# Supplementary material
Source: Hindawi journal article supplement (doi:10.1155/2011/505984)
Supplement: f1 [file 505984.f1.pdf]

## Supplementary Tables

| Gene          | dbSNP ID (rs) | Chromosome position | Strand  |
|---------------|---------------|---------------------|---------|
| <i>CR1</i>    | 9429940       | chr 1 : 207662912   | Forward |
| <i>CR1</i>    | 1571344       | chr 1 : 207670928   | Forward |
| <i>CR1</i>    | 2025935       | chr 1 : 207675655   | Forward |
| <i>CR1</i>    | 4310446       | chr 1 : 207676604   | Forward |
| <i>CR1</i>    | 11117959      | chr 1 : 207684519   | Forward |
| <i>CR1</i>    | 6656401       | chr 1 : 207692049   | Forward |
| <i>CR1</i>    | 10127904      | chr 1 : 207748107   | Forward |
| <i>CR1</i>    | 650877        | chr 1 : 207748793   | Forward |
| <i>CR1</i>    | 3818361       | chr 1 : 207784968   | Forward |
| <i>PS2</i>    | 1150895       | chr 1 : 227056091   | Forward |
| <i>PS2</i>    | 2073489       | chr 1 : 227063671   | Forward |
| <i>PS2</i>    | 1295640       | chr 1 : 227070378   | Forward |
| <i>PS2</i>    | 2802268       | chr 1 : 227084660   | Forward |
| <i>PS2</i>    | 16846644      | chr 1 : 227087243   | Forward |
| <i>PS2</i>    | 12126925      | chr 1 : 227088591   | Forward |
| <i>BIN1</i>   | 4662703       | chr 2 : 127800981   | Reverse |
| <i>BIN1</i>   | 880436        | chr 2 : 127817546   | Reverse |
| <i>BIN1</i>   | 3768857       | chr 2 : 127829282   | Reverse |
| <i>BIN1</i>   | 17014873      | chr 2 : 127830219   | Reverse |
| <i>BIN1</i>   | 2276575       | chr 2 : 127834136   | Reverse |
| <i>BIN1</i>   | 13430599      | chr 2 : 127837041   | Reverse |
| <i>BIN1</i>   | 10194375      | chr 2 : 127839781   | Reverse |
| <i>BIN1</i>   | 13426725      | chr 2 : 127841337   | Reverse |
| <i>BIN1</i>   | 10200967      | chr 2 : 127841769   | Reverse |
| <i>BIN1</i>   | 17014923      | chr 2 : 127841930   | Reverse |
| <i>BIN1</i>   | 6709337       | chr 2 : 127844735   | Reverse |
| <i>BIN1</i>   | 11678252      | chr 2 : 127851697   | Reverse |
| <i>BIN1</i>   | 873270        | chr 2 : 127859418   | Reverse |
| <i>BIN1</i>   | 749008        | chr 2 : 127859441   | Reverse |
| <i>BIN1</i>   | 6743470       | chr 2 : 127868435   | Reverse |
| <i>BIN1</i>   | 4663098       | chr 2 : 127873035   | Reverse |
| <i>BIN1</i>   | 744373        | chr 2 : 127894615   | Reverse |
| <i>CLU</i>    | 7012010       | chr 8 : 27448729    | Reverse |
| <i>CLU</i>    | 10101779      | chr 8 : 27450535    | Reverse |
| <i>CLU</i>    | 10503814      | chr 8 : 27454575    | Reverse |
| <i>CLU</i>    | 11136000      | chr 8 : 27464519    | Reverse |
| <i>CLU</i>    | 9314349       | chr 8 : 27474202    | Reverse |
| <i>CLU</i>    | 492638        | chr 8 : 27479227    | Reverse |
| <i>PICALM</i> | 10898425      | chr 11 : 85647219   | Reverse |
| <i>PICALM</i> | 618679        | chr 11 : 85671702   | Reverse |
| <i>PICALM</i> | 2077815       | chr 11 : 85672383   | Reverse |
| <i>PICALM</i> | 10898427      | chr 11 : 85674046   | Reverse |
| <i>PICALM</i> | 11234495      | chr 11 : 85675434   | Reverse |
| <i>PICALM</i> | 510566        | chr 11 : 85677839   | Reverse |
| <i>PICALM</i> | 10501602      | chr 11 : 85681389   | Reverse |
| <i>PICALM</i> | 10501604      | chr 11 : 85683554   | Reverse |
| <i>PICALM</i> | 713346        | chr 11 : 85688209   | Reverse |
| <i>PICALM</i> | 475639        | chr 11 : 85689785   | Reverse |
| <i>PICALM</i> | 669336        | chr 11 : 85698867   | Reverse |

|                 |          |                   |         |
|-----------------|----------|-------------------|---------|
| <i>PICALM</i>   | 7938033  | chr 11 : 85702130 | Reverse |
| <i>PICALM</i>   | 10792820 | chr 11 : 85703974 | Reverse |
| <i>PICALM</i>   | 527162   | chr 11 : 85715736 | Reverse |
| <i>PICALM</i>   | 680119   | chr 11 : 85716032 | Reverse |
| <i>PICALM</i>   | 10792821 | chr 11 : 85718641 | Reverse |
| <i>PICALM</i>   | 642949   | chr 11 : 85729372 | Reverse |
| <i>PICALM</i>   | 666682   | chr 11 : 85739838 | Reverse |
| <i>PICALM</i>   | 664629   | chr 11 : 85751883 | Reverse |
| <i>PICALM</i>   | 17745273 | chr 11 : 85755538 | Reverse |
| <i>PICALM</i>   | 1941375  | chr 11 : 85757133 | Reverse |
| <i>PICALM</i>   | 677909   | chr 11 : 85757589 | Reverse |
| <i>PICALM</i>   | 11234532 | chr 11 : 85772636 | Reverse |
| <i>PICALM</i>   | 10501608 | chr 11 : 85777841 | Reverse |
| <i>PICALM</i>   | 669556   | chr 11 : 85781322 | Reverse |
| <i>PICALM</i>   | 621942   | chr 11 : 85783738 | Reverse |
| <i>PICALM</i>   | 536841   | chr 11 : 85787824 | Reverse |
| <i>PICALM</i>   | 541458   | chr 11 : 85783738 | Reverse |
| <i>PICALM</i>   | 3851179  | chr 11 : 85868640 | Reverse |
| <i>PS1</i>      | 362412   | chr 14 : 73571406 | Forward |
| <i>PS1</i>      | 214273   | chr 14 : 73616124 | Forward |
| <i>PS1</i>      | 8006497  | chr 14 : 73629732 | Forward |
| <i>PS1</i>      | 362350   | chr 14 : 73631092 | Forward |
| <i>PS1</i>      | 214260   | chr 14 : 73662629 | Forward |
| <i>PS1</i>      | 165933   | chr 14 : 73665354 | Forward |
| <i>PS1</i>      | 362377   | chr 14 : 73678213 | Forward |
| <i>PS1</i>      | 165935   | chr 14 : 73687144 | Forward |
| <i>PS1</i>      | 362346   | chr 14 : 73694590 | Forward |
| <i>TRAPPC6A</i> | 7247764  | chr 19 : 45675873 | Reverse |
| <i>TRAPPC6A</i> | 28555639 | chr 19 : 45676364 | Reverse |
| <i>TRAPPC6A</i> | 12460041 | chr 19 : 45677315 | Reverse |
| intergenic      | 2627641  | chr 19 : 45708758 |         |
| intergenic      | 597668   | chr 19 : 45708888 |         |
| <i>EXOC3L2</i>  | 10422797 | chr 19 : 45726106 | Reverse |
| <i>EXOC3L2</i>  | 346763   | chr 19 : 45729275 | Reverse |
| intergenic      | 17356664 | chr 19 : 45740771 |         |
| <i>MARK4</i>    | 10445572 | chr 19 : 45767214 | Forward |
| <i>MARK4</i>    | 2240672  | chr 19 : 45769575 | Forward |
| <i>MARK4</i>    | 345409   | chr 19 : 45779635 | Forward |
| <i>MARK4</i>    | 11883302 | chr 19 : 45788612 | Forward |
| <i>MARK4</i>    | 344807   | chr 19 : 45799442 | Forward |
| <i>MARK4</i>    | 2306660  | chr 19 : 45802863 | Forward |
| <i>CKM</i>      | 8111989  | chr 19 : 45809208 | Reverse |
| <i>CKM</i>      | 7260463  | chr 19 : 45814860 | Reverse |
| <i>APP</i>      | 2829961  | chr 21 : 27241995 | Reverse |
| <i>APP</i>      | 3787620  | chr 21 : 27255117 | Reverse |
| <i>APP</i>      | 373521   | chr 21 : 27257660 | Reverse |
| <i>APP</i>      | 2829973  | chr 21 : 27260456 | Reverse |
| <i>APP</i>      | 1783025  | chr 21 : 27266763 | Reverse |
| <i>APP</i>      | 380417   | chr 21 : 27272159 | Reverse |
| <i>APP</i>      | 1787438  | chr 21 : 27274089 | Reverse |
| <i>APP</i>      | 17001492 | chr 21 : 27278247 | Reverse |
| <i>APP</i>      | 1783016  | chr 21 : 27280038 | Reverse |

|            |          |                   |         |
|------------|----------|-------------------|---------|
| <b>APP</b> | 396969   | chr 21 : 27281177 | Reverse |
| <b>APP</b> | 214488   | chr 21 : 27287924 | Reverse |
| <b>APP</b> | 383700   | chr 21 : 27298769 | Reverse |
| <b>APP</b> | 2829984  | chr 21 : 27304252 | Reverse |
| <b>APP</b> | 2234983  | chr 21 : 27316874 | Reverse |
| <b>APP</b> | 216779   | chr 21 : 27323704 | Reverse |
| <b>APP</b> | 400603   | chr 21 : 27325288 | Reverse |
| <b>APP</b> | 2829997  | chr 21 : 27326859 | Reverse |
| <b>APP</b> | 440666   | chr 21 : 27328175 | Reverse |
| <b>APP</b> | 2014146  | chr 21 : 27335022 | Reverse |
| <b>APP</b> | 216762   | chr 21 : 27336168 | Reverse |
| <b>APP</b> | 2070657  | chr 21 : 27355017 | Reverse |
| <b>APP</b> | 7276036  | chr 21 : 27361704 | Reverse |
| <b>APP</b> | 2830000  | chr 21 : 27361768 | Reverse |
| <b>APP</b> | 2830001  | chr 21 : 27361908 | Reverse |
| <b>APP</b> | 7278838  | chr 21 : 27374604 | Reverse |
| <b>APP</b> | 2830008  | chr 21 : 27391459 | Reverse |
| <b>APP</b> | 2830012  | chr 21 : 27397607 | Reverse |
| <b>APP</b> | 2226330  | chr 21 : 27399525 | Reverse |
| <b>APP</b> | 2830017  | chr 21 : 27402155 | Reverse |
| <b>APP</b> | 2830018  | chr 21 : 27402193 | Reverse |
| <b>APP</b> | 768039   | chr 21 : 27408020 | Reverse |
| <b>APP</b> | 2830028  | chr 21 : 27427248 | Reverse |
| <b>APP</b> | 3991     | chr 21 : 27428256 | Reverse |
| <b>APP</b> | 2830033  | chr 21 : 27430925 | Reverse |
| <b>APP</b> | 2830036  | chr 21 : 27435525 | Reverse |
| <b>APP</b> | 2830038  | chr 21 : 27442596 | Reverse |
| <b>APP</b> | 7283136  | chr 21 : 27444110 | Reverse |
| <b>APP</b> | 2830040  | chr 21 : 27446432 | Reverse |
| <b>APP</b> | 731523   | chr 21 : 27450172 | Reverse |
| <b>APP</b> | 2830044  | chr 21 : 27454995 | Reverse |
| <b>APP</b> | 2830051  | chr 21 : 27465355 | Reverse |
| <b>APP</b> | 2830052  | chr 21 : 27465597 | Reverse |
| <b>APP</b> | 11702267 | chr 21 : 27468740 | Reverse |
| <b>APP</b> | 2830054  | chr 21 : 27476104 | Reverse |
| <b>APP</b> | 12482262 | chr 21 : 27477294 | Reverse |
| <b>APP</b> | 2256331  | chr 21 : 27478014 | Reverse |
| <b>APP</b> | 3827166  | chr 21 : 27481317 | Reverse |
| <b>APP</b> | 2830058  | chr 21 : 27484968 | Reverse |
| <b>APP</b> | 2830068  | chr 21 : 27496667 | Reverse |
| <b>APP</b> | 2830076  | chr 21 : 27502468 | Reverse |
| <b>APP</b> | 2830079  | chr 21 : 27506241 | Reverse |
| <b>APP</b> | 466609   | chr 21 : 27506317 | Reverse |
| <b>APP</b> | 12482753 | chr 21 : 27513837 | Reverse |
| <b>APP</b> | 375369   | chr 21 : 27514373 | Reverse |
| <b>APP</b> | 2830088  | chr 21 : 27514740 | Reverse |
| <b>APP</b> | 17588612 | chr 21 : 27517203 | Reverse |
| <b>APP</b> | 10460695 | chr 21 : 27520111 | Reverse |
| <b>APP</b> | 2186302  | chr 21 : 27520714 | Reverse |
| <b>APP</b> | 13049230 | chr 21 : 27521417 | Reverse |
| <b>APP</b> | 370345   | chr 21 : 27525258 | Reverse |
| <b>APP</b> | 6516727  | chr 21 : 27525506 | Reverse |

|            |         |                   |         |
|------------|---------|-------------------|---------|
| <b>APP</b> | 2830104 | chr 21 : 27537584 | Reverse |
| <b>APP</b> | 462281  | chr 21 : 27537769 | Reverse |
| <b>APP</b> | 466448  | chr 21 : 27544108 | Reverse |
| <b>APP</b> | 438031  | chr 21 : 27546004 | Reverse |
| <b>APP</b> | 2156079 | chr 21 : 27548330 | Reverse |

**Table S1.** Candidate gene list. The SNPs examined in this study are listed according to their genomic location in dbSNP 132.

| GENE        | dbSNP ID (rs) | Minor Allele | GCA11 |       | GCA70 |       |       | VF    |       |       | MR    |       |       | LM    |       |       |
|-------------|---------------|--------------|-------|-------|-------|-------|-------|-------|-------|-------|-------|-------|-------|-------|-------|-------|
|             |               |              | assoc | APOE  | assoc | GCA11 | APOE  |
| <i>CR1</i>  | 9429940       | 4            | 0.226 | 0.235 | 0.247 | 0.370 | 0.307 | 0.826 | 0.784 | 0.772 | 1.000 | 0.727 | 0.600 | 1.000 | 1.000 | 0.929 |
| <i>CR1</i>  | 1571344       | 2            | 0.857 | 0.778 | 0.278 | 0.085 | 0.288 | 0.326 | 0.317 | 0.339 | 0.778 | 0.571 | 0.395 | 0.058 | 0.061 | 0.054 |
| <i>CR1</i>  | 2025935       | 4            | 1.000 | 0.857 | 1.000 | 0.857 | 0.778 | 0.779 | 0.730 | 0.701 | 0.102 | 0.153 | 0.126 | 0.938 | 0.727 | 0.857 |
| <i>CR1</i>  | 4310446       | 2            | 0.857 | 1.000 | 0.370 | 0.292 | 0.410 | 0.640 | 0.784 | 0.654 | 0.312 | 0.386 | 0.321 | 0.750 | 0.611 | 0.714 |
| <i>CR1</i>  | 11117959      | 3            | 1.000 | 0.778 | 0.857 | 0.432 | 0.889 | 0.256 | 0.487 | 0.284 | 0.875 | 0.455 | 0.600 | 0.354 | 0.159 | 0.267 |
| <i>CR1</i>  | 6656401       | 1            | 0.600 | 0.500 | 0.124 | 0.113 | 0.130 | 0.350 | 0.316 | 0.284 | 0.667 | 0.571 | 0.737 | 0.857 | 0.929 | 0.647 |
| <i>CR1</i>  | 10127904      | 3            | 1.000 | 1.000 | 1.000 | 0.778 | 1.000 | 0.605 | 0.514 | 0.638 | 0.667 | 0.909 | 0.889 | 0.611 | 0.857 | 0.786 |
| <i>CR1</i>  | 650877        | 3            | 0.857 | 0.778 | 1.000 | 0.857 | 0.889 | 0.194 | 0.460 | 0.213 | 0.875 | 0.611 | 0.889 | 0.688 | 0.370 | 0.500 |
| <i>CR1</i>  | 3818361       | 4            | 0.113 | 0.087 | 0.037 | 0.054 | 0.038 | 0.213 | 0.242 | 0.171 | 0.370 | 0.410 | 0.483 | 0.857 | 0.929 | 0.727 |
| <i>PS2</i>  | 1150895       | 2            | 0.441 | 0.600 | 0.692 | 0.611 | 0.778 | 0.442 | 0.333 | 0.417 | 1.000 | 0.818 | 0.727 | 0.279 | 0.312 | 0.441 |
| <i>PS2</i>  | 2073489       | 4            | 0.250 | 0.378 | 0.484 | 0.667 | 0.321 | 0.384 | 0.275 | 0.535 | 0.500 | 0.340 | 0.444 | 0.565 | 0.520 | 0.714 |
| <i>PS2</i>  | 1295640       | 2            | 0.441 | 0.600 | 0.212 | 0.692 | 0.118 | 0.512 | 0.811 | 0.567 | 1.000 | 0.818 | 1.000 | 0.378 | 0.190 | 0.500 |
| <i>PS2</i>  | 2802268       | 3            | 0.238 | 0.244 | 0.182 | 0.139 | 0.120 | 0.709 | 0.892 | 0.756 | 0.322 | 0.167 | 0.238 | 1.000 | 0.857 | 0.929 |
| <i>PS2</i>  | 16846644      | 4            | 0.667 | 0.778 | 0.321 | 0.542 | 0.354 | 0.233 | 0.284 | 0.260 | 0.875 | 1.000 | 0.778 | 1.000 | 1.000 | 1.000 |
| <i>PS2</i>  | 12126925      | 1            | 0.857 | 1.000 | 1.000 | 1.000 | 1.000 | 0.779 | 0.649 | 0.701 | 0.571 | 0.647 | 0.778 | 0.875 | 1.000 | 1.000 |
| <i>BIN1</i> | 4662703       | 3            | 0.412 | 0.643 | 0.341 | 0.190 | 0.209 | 0.778 | 0.667 | 0.857 | 1.000 | 0.857 | 1.000 | 0.625 | 0.588 | 0.857 |
| <i>BIN1</i> | 880436        | 4            | 0.480 | 0.667 | 0.182 | 0.183 | 0.207 | 0.857 | 0.857 | 0.857 | 0.857 | 0.857 | 0.857 | 0.857 | 0.857 | 1.000 |
| <i>BIN1</i> | 3768857       | 1            | 0.778 | 0.625 | 1.000 | 0.482 | 0.778 | 0.234 | 0.667 | 0.188 | 0.424 | 0.727 | 0.857 | 1.000 | 0.375 | 0.727 |
| <i>BIN1</i> | 17014873      | 2            | 0.053 | 0.022 | 0.036 | 0.016 | 0.024 | 0.079 | 0.106 | 0.071 | 0.326 | 0.194 | 0.286 | 0.153 | 0.122 | 0.117 |
| <i>BIN1</i> | 2276575       | 3            | 0.014 | 0.025 | 0.375 | 0.500 | 0.333 | 0.041 | 0.050 | 0.076 | 0.778 | 0.333 | 0.357 | 0.378 | 0.326 | 0.375 |
| <i>BIN1</i> | 13430599      | 4            | 0.014 | 0.025 | 0.375 | 0.500 | 0.333 | 0.041 | 0.050 | 0.076 | 0.778 | 0.333 | 0.357 | 0.378 | 0.326 | 0.375 |
| <i>BIN1</i> | 10194375      | 1            | 0.065 | 0.063 | 0.341 | 0.281 | 0.375 | 0.134 | 0.081 | 0.274 | 0.035 | 0.031 | 0.036 | 0.200 | 0.104 | 0.119 |
| <i>BIN1</i> | 13426725      | 2            | 0.019 | 0.048 | 0.375 | 0.448 | 0.333 | 0.026 | 0.027 | 0.029 | 0.333 | 0.341 | 0.357 | 0.333 | 0.326 | 0.500 |
| <i>BIN1</i> | 10200967      | 2            | 0.233 | 0.239 | 0.188 | 0.464 | 0.438 | 0.464 | 1.000 | 0.579 | 0.012 | 0.031 | 0.019 | 0.643 | 0.857 | 0.727 |
| <i>BIN1</i> | 17014923      | 4            | 0.233 | 0.412 | 0.667 | 0.667 | 0.778 | 0.588 | 0.349 | 0.625 | 0.433 | 0.239 | 0.524 | 0.063 | 0.045 | 0.059 |
| <i>BIN1</i> | 6709337       | 1            | 0.727 | 1.000 | 0.857 | 1.000 | 1.000 | 0.522 | 0.198 | 0.389 | 0.108 | 0.222 | 0.087 | 0.857 | 0.857 | 0.588 |
| <i>BIN1</i> | 11678252      | 3            | 0.326 | 0.357 | 1.000 | 1.000 | 0.778 | 0.625 | 0.500 | 0.448 | 0.239 | 0.217 | 0.167 | 0.524 | 0.433 | 0.643 |
| <i>BIN1</i> | 873270        | 3            | 0.320 | 0.480 | 0.857 | 0.778 | 0.857 | 0.857 | 0.448 | 0.588 | 0.778 | 1.000 | 0.643 | 0.857 | 1.000 | 1.000 |
| <i>BIN1</i> | 749008        | 2            | 1.000 | 1.000 | 1.000 | 0.550 | 1.000 | 0.588 | 0.341 | 0.625 | 1.000 | 0.778 | 0.857 | 0.281 | 0.178 | 0.296 |
| <i>BIN1</i> | 6743470       | 4            | 0.480 | 0.857 | 1.000 | 0.778 | 1.000 | 0.625 | 0.579 | 0.727 | 0.857 | 0.857 | 0.778 | 0.176 | 0.074 | 0.085 |

|               |          |   |       |       |       |       |       |       |       |       |       |       |       |       |       |       |
|---------------|----------|---|-------|-------|-------|-------|-------|-------|-------|-------|-------|-------|-------|-------|-------|-------|
| <b>BIN1</b>   | 4663098  | 4 | 0.778 | 0.857 | 0.778 | 0.727 | 0.857 | 1.000 | 1.000 | 1.000 | 0.048 | 0.113 | 0.055 | 0.857 | 0.778 | 1.000 |
| <b>BIN1</b>   | 744373   | 3 | 1.000 | 0.857 | 0.857 | 1.000 | 0.667 | 0.956 | 0.726 | 0.916 | 0.212 | 0.256 | 0.250 | 0.386 | 0.600 | 0.520 |
| <b>CLU</b>    | 7012010  | 2 | 0.153 | 0.360 | 0.483 | 0.122 | 0.395 | 0.106 | 0.360 | 0.154 | 0.112 | 0.085 | 0.141 | 0.500 | 0.520 | 0.786 |
| <b>CLU</b>    | 10101779 | 2 | 0.312 | 0.857 | 0.483 | 0.137 | 0.571 | 0.188 | 0.460 | 0.244 | 0.175 | 0.094 | 0.250 | 1.000 | 0.647 | 1.000 |
| <b>CLU</b>    | 10503814 | 4 | 0.571 | 0.519 | 0.316 | 0.727 | 0.253 | 0.965 | 0.622 | 0.937 | 0.875 | 0.542 | 0.889 | 0.750 | 0.611 | 0.929 |
| <b>CLU</b>    | 11136000 | 4 | 0.857 | 0.857 | 1.000 | 0.571 | 0.889 | 0.066 | 0.180 | 0.083 | 0.727 | 0.519 | 0.778 | 0.519 | 0.611 | 0.441 |
| <b>CLU</b>    | 9314349  | 3 | 0.128 | 0.092 | 0.455 | 0.322 | 0.542 | 0.523 | 0.595 | 0.433 | 0.520 | 0.312 | 0.386 | 0.070 | 0.111 | 0.074 |
| <b>CLU</b>    | 492638   | 4 | 1.000 | 0.857 | 0.857 | 0.727 | 0.889 | 0.074 | 0.067 | 0.116 | 0.239 | 0.270 | 0.316 | 0.134 | 0.124 | 0.173 |
| <b>PICALM</b> | 10898425 | 4 | 0.154 | 0.297 | 0.778 | 0.857 | 1.000 | 0.733 | 0.973 | 0.835 | 0.727 | 1.000 | 1.000 | 0.688 | 1.000 | 0.786 |
| <b>PICALM</b> | 618679   | 4 | 0.857 | 1.000 | 1.000 | 0.857 | 1.000 | 0.837 | 0.838 | 0.756 | 0.370 | 0.302 | 0.500 | 0.469 | 0.778 | 0.520 |
| <b>PICALM</b> | 2077815  | 3 | 0.857 | 1.000 | 0.857 | 0.857 | 1.000 | 0.779 | 0.703 | 0.724 | 0.312 | 0.270 | 0.500 | 0.432 | 0.354 | 0.519 |
| <b>PICALM</b> | 10898427 | 3 | 0.432 | 0.441 | 0.778 | 0.611 | 0.778 | 0.663 | 0.568 | 0.701 | 0.025 | 0.009 | 0.029 | 1.000 | 0.857 | 1.000 |
| <b>PICALM</b> | 11234495 | 4 | 0.307 | 0.346 | 0.667 | 0.353 | 0.421 | 0.988 | 0.838 | 0.992 | 0.052 | 0.020 | 0.045 | 0.688 | 0.778 | 0.857 |
| <b>PICALM</b> | 510566   | 1 | 1.000 | 0.857 | 0.857 | 0.778 | 0.889 | 0.837 | 0.892 | 0.890 | 0.611 | 0.818 | 0.520 | 0.688 | 0.857 | 0.542 |
| <b>PICALM</b> | 10501602 | 3 | 0.857 | 0.857 | 0.126 | 0.034 | 0.103 | 0.721 | 0.649 | 0.732 | 1.000 | 0.727 | 1.000 | 0.165 | 0.154 | 0.142 |
| <b>PICALM</b> | 10501604 | 1 | 0.611 | 1.000 | 0.727 | 0.692 | 0.778 | 0.454 | 0.514 | 0.488 | 0.006 | 0.007 | 0.010 | 0.346 | 0.410 | 0.410 |
| <b>PICALM</b> | 713346   | 2 | 0.354 | 0.484 | 0.542 | 0.267 | 0.692 | 0.558 | 0.460 | 0.528 | 0.164 | 0.091 | 0.233 | 0.688 | 0.692 | 0.714 |
| <b>PICALM</b> | 475639   | 2 | 0.297 | 0.405 | 0.542 | 0.857 | 0.778 | 0.721 | 0.919 | 0.795 | 0.455 | 0.151 | 0.421 | 1.000 | 0.727 | 0.786 |
| <b>PICALM</b> | 669336   | 1 | 0.857 | 1.000 | 0.469 | 0.571 | 0.400 | 0.523 | 0.784 | 0.551 | 1.000 | 0.727 | 1.000 | 0.444 | 0.692 | 0.444 |
| <b>PICALM</b> | 7938033  | 2 | 0.102 | 0.094 | 0.208 | 0.469 | 0.354 | 0.244 | 0.541 | 0.331 | 0.647 | 0.692 | 0.727 | 0.378 | 0.542 | 0.441 |
| <b>PICALM</b> | 10792820 | 2 | 0.354 | 0.483 | 0.333 | 0.137 | 0.267 | 0.488 | 0.487 | 0.504 | 0.204 | 0.102 | 0.236 | 0.647 | 0.520 | 0.611 |
| <b>PICALM</b> | 527162   | 2 | 0.692 | 1.000 | 1.000 | 0.857 | 1.000 | 0.930 | 0.892 | 0.835 | 0.455 | 0.353 | 0.520 | 0.444 | 0.333 | 0.520 |
| <b>PICALM</b> | 680119   | 4 | 0.081 | 0.157 | 0.159 | 0.857 | 0.231 | 0.465 | 0.811 | 0.520 | 0.778 | 0.322 | 0.889 | 0.410 | 0.778 | 0.542 |
| <b>PICALM</b> | 10792821 | 2 | 0.432 | 0.469 | 0.727 | 0.611 | 0.778 | 0.640 | 0.541 | 0.654 | 0.047 | 0.014 | 0.040 | 1.000 | 0.857 | 1.000 |
| <b>PICALM</b> | 642949   | 2 | 0.161 | 0.275 | 0.565 | 1.000 | 0.727 | 0.616 | 1.000 | 0.654 | 0.571 | 0.256 | 0.520 | 0.647 | 0.727 | 0.611 |
| <b>PICALM</b> | 666682   | 2 | 0.307 | 0.405 | 0.857 | 0.857 | 1.000 | 0.674 | 1.000 | 0.685 | 0.647 | 0.267 | 1.000 | 0.750 | 0.727 | 0.714 |
| <b>PICALM</b> | 664629   | 3 | 0.500 | 0.692 | 0.096 | 0.193 | 0.094 | 0.349 | 0.568 | 0.354 | 0.219 | 0.307 | 0.250 | 0.071 | 0.077 | 0.071 |
| <b>PICALM</b> | 17745273 | 3 | 0.155 | 0.155 | 0.250 | 0.778 | 0.362 | 0.535 | 0.649 | 0.480 | 1.000 | 0.909 | 1.000 | 0.169 | 0.260 | 0.152 |
| <b>PICALM</b> | 1941375  | 3 | 0.520 | 0.727 | 0.778 | 1.000 | 0.611 | 0.523 | 0.811 | 0.567 | 0.253 | 0.667 | 0.247 | 0.239 | 0.353 | 0.253 |
| <b>PICALM</b> | 677909   | 3 | 1.000 | 0.857 | 0.302 | 0.095 | 0.208 | 0.919 | 0.703 | 0.898 | 0.400 | 0.370 | 0.500 | 0.135 | 0.135 | 0.135 |
| <b>PICALM</b> | 11234532 | 1 | 0.288 | 0.346 | 0.692 | 0.500 | 0.778 | 0.581 | 0.333 | 0.339 | 0.046 | 0.034 | 0.077 | 0.611 | 0.455 | 0.611 |
| <b>PICALM</b> | 10501608 | 1 | 0.727 | 1.000 | 0.484 | 0.692 | 0.778 | 0.430 | 0.460 | 0.480 | 0.008 | 0.010 | 0.011 | 0.353 | 0.370 | 0.410 |
| <b>PICALM</b> | 669556   | 3 | 0.857 | 1.000 | 1.000 | 0.857 | 1.000 | 0.954 | 0.946 | 0.898 | 0.875 | 0.354 | 0.520 | 0.611 | 0.857 | 0.647 |
| <b>PICALM</b> | 621942   | 4 | 0.857 | 1.000 | 0.778 | 0.857 | 0.778 | 0.651 | 0.892 | 0.709 | 0.247 | 0.231 | 0.171 | 0.750 | 1.000 | 0.857 |

|                   |            |   |       |       |       |       |       |       |       |       |       |       |       |       |       |       |
|-------------------|------------|---|-------|-------|-------|-------|-------|-------|-------|-------|-------|-------|-------|-------|-------|-------|
| <b>PICALM</b>     | 536841     | 2 | 0.857 | 0.857 | 0.275 | 0.091 | 0.180 | 0.767 | 0.568 | 0.772 | 0.727 | 0.400 | 0.483 | 0.112 | 0.114 | 0.124 |
| <b>PICALM</b>     | 541458     | 2 | 1.000 | 1.000 | 0.274 | 0.132 | 0.149 | 0.769 | 0.726 | 0.739 | 0.583 | 0.483 | 0.571 | 0.139 | 0.130 | 0.180 |
| <b>PICALM</b>     | 3851179    | 1 | 0.667 | 0.778 | 0.086 | 0.075 | 0.096 | 0.694 | 0.695 | 0.643 | 0.917 | 0.857 | 0.895 | 0.520 | 0.500 | 0.297 |
| <b>PS1</b>        | 362412     | 4 | 1.000 | 0.692 | 0.519 | 0.667 | 0.469 | 0.535 | 0.676 | 0.591 | 0.875 | 0.727 | 0.778 | 0.750 | 0.778 | 0.786 |
| <b>PS1</b>        | 214273     | 4 | 0.571 | 0.611 | 0.857 | 1.000 | 0.889 | 0.523 | 0.386 | 0.433 | 1.000 | 0.909 | 0.889 | 0.688 | 0.727 | 0.786 |
| <b>PS1</b>        | 8006497    | 3 | 0.169 | 0.198 | 0.519 | 0.778 | 0.378 | 0.628 | 0.649 | 0.551 | 0.346 | 0.432 | 0.307 | 0.483 | 0.275 | 0.321 |
| <b>PS1</b>        | 362350     | 3 | 1.000 | 1.000 | 0.297 | 0.421 | 0.212 | 0.733 | 1.000 | 0.772 | 0.692 | 0.386 | 0.667 | 0.340 | 0.152 | 0.202 |
| <b>PS1</b>        | 214260     | 1 | 0.483 | 0.354 | 0.778 | 0.778 | 1.000 | 0.733 | 0.568 | 0.685 | 0.647 | 0.600 | 0.600 | 0.346 | 0.370 | 0.455 |
| <b>PS1</b>        | 165933     | 4 | 1.000 | 1.000 | 0.778 | 1.000 | 1.000 | 0.628 | 0.568 | 0.606 | 0.727 | 0.909 | 1.000 | 0.647 | 0.469 | 0.667 |
| <b>PS1</b>        | 362377     | 1 | 0.353 | 0.139 | 1.000 | 0.857 | 0.611 | 0.523 | 0.676 | 0.520 | 1.000 | 1.000 | 1.000 | 0.938 | 1.000 | 0.929 |
| <b>PS1</b>        | 165935     | 3 | 0.173 | 0.228 | 1.000 | 1.000 | 1.000 | 0.628 | 0.676 | 0.669 | 0.386 | 0.362 | 0.484 | 1.000 | 1.000 | 0.929 |
| <b>PS1</b>        | 362346     | 1 | 0.353 | 0.141 | 1.000 | 1.000 | 0.778 | 0.512 | 0.703 | 0.504 | 1.000 | 1.000 | 1.000 | 1.000 | 0.778 | 1.000 |
| <b>TRAPPC6A</b>   | 7247764    | 2 | 0.011 | 0.014 | 0.024 | 0.016 | 0.019 | 0.171 | 0.145 | 0.142 | 0.003 | 0.002 | 0.003 | 0.137 | 0.326 | 0.333 |
| <b>TRAPPC6A</b>   | rs28555639 | 1 | 0.667 | 0.857 | 0.217 | 0.220 | 0.326 | 0.778 | 1.000 | 1.000 | 0.124 | 0.138 | 0.212 | 1.000 | 0.857 | 0.857 |
| <b>TRAPPC6A</b>   | rs12460041 | 2 | 0.143 | 0.143 | 0.130 | 0.212 | 0.100 | 0.727 | 0.857 | 1.000 | 0.118 | 0.182 | 0.095 | 0.327 | 0.524 | 0.438 |
| <b>intergenic</b> | rs2627641  | 2 | 0.667 | 0.482 | 0.239 | 0.296 | 0.349 | 0.857 | 1.000 | 1.000 | 0.778 | 0.400 | 0.857 | 0.237 | 0.366 | 0.228 |
| <b>intergenic</b> | rs597668   | 2 | 0.667 | 0.482 | 0.239 | 0.296 | 0.349 | 1.000 | 1.000 | 1.000 | 0.778 | 0.400 | 0.857 | 0.212 | 0.366 | 0.184 |
| <b>EXOC3L2</b>    | rs10422797 | 2 | 1.000 | 0.857 | 0.778 | 0.182 | 0.524 | 1.000 | 0.778 | 0.857 | 1.000 | 1.000 | 1.000 | 0.857 | 0.857 | 0.857 |
| <b>EXOC3L2</b>    | rs346763   | 1 | 1.000 | 0.857 | 0.778 | 0.162 | 0.524 | 0.857 | 0.778 | 0.667 | 0.857 | 0.857 | 1.000 | 0.667 | 0.857 | 0.857 |
| <b>intergenic</b> | rs17356664 | 4 | 0.246 | 0.389 | 1.000 | 1.000 | 1.000 | 0.378 | 0.341 | 0.349 | 0.464 | 0.400 | 0.279 | 0.448 | 0.643 | 0.482 |
| <b>MARK4</b>      | rs10445572 | 3 | 0.857 | 0.857 | 0.588 | 0.438 | 0.480 | 0.389 | 0.378 | 0.550 | 0.480 | 0.281 | 0.378 | 1.000 | 1.000 | 0.727 |
| <b>MARK4</b>      | rs2240672  | 1 | 0.643 | 0.727 | 0.857 | 1.000 | 1.000 | 0.727 | 0.857 | 0.778 | 0.424 | 0.433 | 0.341 | 0.643 | 0.349 | 0.448 |
| <b>MARK4</b>      | rs345409   | 2 | 0.162 | 0.151 | 1.000 | 0.857 | 0.643 | 1.000 | 1.000 | 1.000 | 0.138 | 0.150 | 0.155 | 0.857 | 0.667 | 0.778 |
| <b>MARK4</b>      | rs11883302 | 2 | 0.038 | 0.057 | 0.302 | 0.236 | 0.274 | 0.095 | 0.174 | 0.105 | 0.012 | 0.011 | 0.016 | 0.579 | 0.424 | 0.778 |
| <b>MARK4</b>      | rs344807   | 4 | 0.857 | 1.000 | 0.857 | 0.625 | 0.857 | 0.667 | 0.625 | 0.667 | 1.000 | 1.000 | 0.857 | 1.000 | 0.643 | 0.643 |
| <b>MARK4</b>      | rs2306660  | 2 | 0.143 | 0.174 | 0.480 | 0.550 | 0.778 | 0.389 | 0.667 | 0.333 | 0.105 | 0.150 | 0.124 | 0.857 | 0.727 | 0.778 |
| <b>CKM</b>        | rs8111989  | 2 | 0.069 | 0.033 | 0.448 | 1.000 | 0.550 | 0.147 | 0.579 | 0.186 | 0.043 | 0.061 | 0.054 | 0.857 | 1.000 | 0.857 |
| <b>CKM</b>        | rs7260463  | 4 | 0.190 | 0.078 | 0.857 | 0.857 | 0.412 | 0.153 | 0.291 | 0.152 | 0.108 | 0.119 | 0.110 | 1.000 | 0.857 | 1.000 |
| <b>APP</b>        | 2829961    | 2 | 0.778 | 0.611 | 0.400 | 0.857 | 0.565 | 0.570 | 0.241 | 0.598 | 0.421 | 0.727 | 0.483 | 0.750 | 1.000 | 0.857 |
| <b>APP</b>        | 3787620    | 2 | 0.386 | 0.247 | 0.727 | 0.378 | 0.727 | 0.861 | 1.000 | 0.740 | 1.000 | 0.667 | 0.778 | 0.455 | 0.483 | 0.714 |
| <b>APP</b>        | 373521     | 1 | 0.727 | 0.727 | 1.000 | 0.857 | 0.727 | 0.826 | 0.541 | 0.882 | 0.778 | 0.909 | 0.571 | 0.750 | 0.400 | 0.714 |
| <b>APP</b>        | 2829973    | 3 | 1.000 | 0.778 | 0.667 | 0.857 | 0.692 | 0.581 | 0.354 | 0.449 | 0.400 | 0.647 | 0.500 | 0.688 | 0.778 | 0.714 |
| <b>APP</b>        | 1783025    | 2 | 0.778 | 0.647 | 0.857 | 0.444 | 0.778 | 0.488 | 0.730 | 0.496 | 1.000 | 0.692 | 1.000 | 1.000 | 0.857 | 0.929 |
| <b>APP</b>        | 380417     | 4 | 1.000 | 0.857 | 0.028 | 0.079 | 0.043 | 0.314 | 0.362 | 0.213 | 0.483 | 0.386 | 0.542 | 0.233 | 0.405 | 0.302 |

|            |          |   |       |       |       |       |       |       |       |       |       |       |       |       |       |       |
|------------|----------|---|-------|-------|-------|-------|-------|-------|-------|-------|-------|-------|-------|-------|-------|-------|
| <b>APP</b> | 1787438  | 4 | 0.857 | 1.000 | 0.241 | 0.432 | 0.267 | 0.454 | 0.595 | 0.433 | 1.000 | 0.909 | 0.727 | 0.231 | 0.484 | 0.611 |
| <b>APP</b> | 17001492 | 2 | 0.455 | 0.857 | 0.444 | 0.260 | 0.600 | 0.361 | 0.514 | 0.291 | 0.091 | 0.231 | 0.158 | 0.813 | 0.647 | 0.600 |
| <b>APP</b> | 1783016  | 4 | 0.857 | 1.000 | 0.353 | 0.455 | 0.500 | 0.070 | 0.137 | 0.113 | 0.159 | 0.244 | 0.155 | 0.688 | 1.000 | 0.929 |
| <b>APP</b> | 396969   | 1 | 0.857 | 0.857 | 0.378 | 0.667 | 0.267 | 0.605 | 0.946 | 0.551 | 0.520 | 0.727 | 0.667 | 0.284 | 0.421 | 0.611 |
| <b>APP</b> | 214488   | 2 | 1.000 | 1.000 | 0.217 | 0.333 | 0.165 | 0.512 | 0.541 | 0.394 | 0.483 | 0.353 | 0.667 | 0.302 | 0.353 | 0.346 |
| <b>APP</b> | 383700   | 1 | 0.857 | 0.857 | 0.378 | 0.667 | 0.267 | 0.605 | 0.946 | 0.551 | 0.520 | 0.727 | 0.667 | 0.284 | 0.421 | 0.611 |
| <b>APP</b> | 2829984  | 4 | 0.611 | 1.000 | 0.400 | 0.333 | 0.500 | 0.628 | 0.811 | 0.630 | 0.284 | 0.312 | 0.288 | 0.520 | 0.692 | 0.714 |
| <b>APP</b> | 2234983  | 1 | 0.727 | 0.727 | 0.267 | 0.279 | 0.226 | 0.605 | 0.676 | 0.488 | 1.000 | 1.000 | 1.000 | 0.600 | 0.565 | 0.647 |
| <b>APP</b> | 216779   | 2 | 1.000 | 0.857 | 0.857 | 1.000 | 0.778 | 0.022 | 0.030 | 0.027 | 0.410 | 0.327 | 0.455 | 0.647 | 0.727 | 0.600 |
| <b>APP</b> | 400603   | 3 | 0.647 | 0.441 | 0.857 | 1.000 | 0.778 | 0.779 | 0.892 | 0.661 | 0.692 | 0.909 | 1.000 | 0.256 | 0.400 | 0.469 |
| <b>APP</b> | 2829997  | 3 | 0.727 | 0.667 | 1.000 | 0.327 | 0.727 | 0.179 | 0.317 | 0.197 | 0.405 | 0.410 | 0.520 | 0.813 | 0.857 | 1.000 |
| <b>APP</b> | 440666   | 4 | 0.778 | 0.520 | 0.484 | 0.284 | 0.611 | 0.837 | 0.838 | 0.764 | 0.875 | 1.000 | 1.000 | 0.875 | 0.857 | 0.857 |
| <b>APP</b> | 2014146  | 3 | 0.441 | 0.421 | 1.000 | 0.727 | 1.000 | 0.093 | 0.177 | 0.173 | 0.727 | 0.727 | 0.778 | 0.098 | 0.138 | 0.162 |
| <b>APP</b> | 216762   | 4 | 0.455 | 0.571 | 0.857 | 0.611 | 0.778 | 0.047 | 0.083 | 0.069 | 1.000 | 0.818 | 0.889 | 0.060 | 0.084 | 0.054 |
| <b>APP</b> | 2070657  | 3 | 0.727 | 0.692 | 0.370 | 0.400 | 0.267 | 0.337 | 0.541 | 0.236 | 0.875 | 0.520 | 1.000 | 0.571 | 1.000 | 0.786 |
| <b>APP</b> | 7276036  | 1 | 0.778 | 0.692 | 0.206 | 0.297 | 0.156 | 0.053 | 0.082 | 0.055 | 1.000 | 0.727 | 1.000 | 0.813 | 0.857 | 0.857 |
| <b>APP</b> | 2830000  | 1 | 0.778 | 0.692 | 0.206 | 0.297 | 0.180 | 0.062 | 0.099 | 0.059 | 1.000 | 0.611 | 1.000 | 0.875 | 0.857 | 0.857 |
| <b>APP</b> | 2830001  | 1 | 0.565 | 0.692 | 0.362 | 0.208 | 0.410 | 0.134 | 0.077 | 0.181 | 0.875 | 0.909 | 0.889 | 0.333 | 0.455 | 0.362 |
| <b>APP</b> | 7278838  | 1 | 0.857 | 0.432 | 0.247 | 0.250 | 0.270 | 0.014 | 0.019 | 0.013 | 0.667 | 0.727 | 1.000 | 0.275 | 0.455 | 0.370 |
| <b>APP</b> | 2830008  | 2 | 0.857 | 0.727 | 0.340 | 0.421 | 0.500 | 0.060 | 0.147 | 0.091 | 1.000 | 1.000 | 1.000 | 0.117 | 0.115 | 0.100 |
| <b>APP</b> | 2830012  | 1 | 0.857 | 0.857 | 0.600 | 0.520 | 0.727 | 0.028 | 0.016 | 0.021 | 0.441 | 0.421 | 0.778 | 0.120 | 0.109 | 0.103 |
| <b>APP</b> | 2226330  | 1 | 0.571 | 1.000 | 0.362 | 0.354 | 0.316 | 0.190 | 0.244 | 0.268 | 0.778 | 0.520 | 0.500 | 0.750 | 0.727 | 0.786 |
| <b>APP</b> | 2830017  | 4 | 0.571 | 1.000 | 0.362 | 0.235 | 0.410 | 0.196 | 0.148 | 0.284 | 0.875 | 0.611 | 0.500 | 0.688 | 0.692 | 0.714 |
| <b>APP</b> | 2830018  | 3 | 0.571 | 1.000 | 0.362 | 0.235 | 0.410 | 0.193 | 0.148 | 0.284 | 0.875 | 0.611 | 0.500 | 0.688 | 0.692 | 0.714 |
| <b>APP</b> | 768039   | 4 | 1.000 | 1.000 | 0.857 | 0.857 | 0.727 | 0.372 | 0.541 | 0.457 | 0.875 | 0.727 | 0.520 | 0.231 | 0.188 | 0.165 |
| <b>APP</b> | 2830028  | 4 | 0.727 | 0.500 | 0.400 | 0.212 | 0.692 | 0.139 | 0.064 | 0.131 | 0.875 | 0.727 | 0.778 | 0.565 | 0.565 | 0.714 |
| <b>APP</b> | 3991     | 4 | 1.000 | 1.000 | 1.000 | 0.857 | 0.889 | 0.372 | 0.241 | 0.472 | 0.542 | 0.400 | 0.600 | 0.875 | 1.000 | 0.929 |
| <b>APP</b> | 2830033  | 4 | 1.000 | 0.778 | 0.647 | 1.000 | 0.484 | 0.872 | 0.568 | 0.929 | 0.611 | 0.410 | 0.647 | 0.432 | 0.519 | 0.244 |
| <b>APP</b> | 2830036  | 4 | 0.647 | 0.520 | 0.241 | 0.278 | 0.400 | 0.198 | 0.432 | 0.205 | 0.600 | 0.692 | 1.000 | 1.000 | 1.000 | 0.857 |
| <b>APP</b> | 2830038  | 3 | 1.000 | 0.857 | 0.857 | 1.000 | 0.692 | 0.226 | 0.117 | 0.236 | 0.692 | 1.000 | 0.778 | 0.688 | 0.692 | 0.600 |
| <b>APP</b> | 7283136  | 2 | 0.857 | 1.000 | 0.778 | 1.000 | 0.692 | 0.802 | 0.378 | 0.622 | 0.778 | 0.190 | 0.432 | 0.875 | 0.483 | 0.786 |
| <b>APP</b> | 2830040  | 4 | 0.146 | 0.190 | 0.267 | 0.226 | 0.370 | 0.314 | 0.354 | 0.409 | 0.875 | 0.909 | 1.000 | 0.346 | 0.274 | 0.484 |
| <b>APP</b> | 731523   | 4 | 0.421 | 0.410 | 0.857 | 0.857 | 0.889 | 0.570 | 0.919 | 0.488 | 1.000 | 0.727 | 1.000 | 0.688 | 1.000 | 0.786 |
| <b>APP</b> | 2830044  | 2 | 0.455 | 0.378 | 1.000 | 1.000 | 0.778 | 0.314 | 0.460 | 0.362 | 0.469 | 0.565 | 0.354 | 0.750 | 1.000 | 0.786 |

|            |          |   |       |       |       |       |       |       |       |       |       |       |       |       |       |       |
|------------|----------|---|-------|-------|-------|-------|-------|-------|-------|-------|-------|-------|-------|-------|-------|-------|
| <b>APP</b> | 2830051  | 2 | 0.692 | 0.692 | 0.147 | 0.370 | 0.210 | 0.314 | 0.134 | 0.433 | 1.000 | 0.542 | 1.000 | 0.688 | 0.727 | 0.520 |
| <b>APP</b> | 2830052  | 2 | 0.156 | 0.164 | 0.103 | 0.200 | 0.140 | 0.640 | 0.946 | 0.693 | 1.000 | 0.909 | 1.000 | 0.134 | 0.250 | 0.128 |
| <b>APP</b> | 11702267 | 4 | 0.692 | 0.692 | 0.727 | 1.000 | 1.000 | 0.231 | 0.333 | 0.260 | 0.275 | 0.212 | 0.267 | 0.938 | 1.000 | 1.000 |
| <b>APP</b> | 2830054  | 3 | 0.312 | 0.250 | 0.611 | 0.778 | 0.441 | 0.721 | 0.676 | 0.740 | 0.778 | 0.818 | 0.778 | 0.600 | 0.400 | 0.370 |
| <b>APP</b> | 12482262 | 3 | 0.857 | 0.520 | 0.520 | 0.778 | 0.520 | 0.198 | 0.147 | 0.148 | 0.105 | 0.083 | 0.086 | 0.260 | 0.157 | 0.275 |
| <b>APP</b> | 2256331  | 3 | 0.778 | 0.519 | 0.778 | 1.000 | 0.727 | 0.767 | 0.541 | 0.748 | 0.727 | 0.692 | 0.889 | 0.267 | 0.231 | 0.233 |
| <b>APP</b> | 3827166  | 3 | 0.647 | 0.571 | 0.076 | 0.082 | 0.123 | 0.767 | 0.649 | 0.677 | 1.000 | 0.909 | 1.000 | 1.000 | 1.000 | 1.000 |
| <b>APP</b> | 2830058  | 2 | 0.647 | 0.571 | 0.076 | 0.082 | 0.123 | 0.767 | 0.649 | 0.677 | 1.000 | 0.909 | 1.000 | 1.000 | 1.000 | 1.000 |
| <b>APP</b> | 2830068  | 4 | 0.340 | 0.226 | 0.354 | 0.354 | 0.354 | 0.954 | 0.973 | 0.890 | 0.875 | 0.909 | 0.889 | 0.340 | 0.182 | 0.270 |
| <b>APP</b> | 2830076  | 4 | 0.400 | 0.244 | 0.279 | 0.288 | 0.228 | 0.686 | 0.703 | 0.677 | 0.778 | 0.909 | 0.778 | 0.542 | 0.340 | 0.288 |
| <b>APP</b> | 2830079  | 3 | 0.647 | 0.727 | 0.052 | 0.075 | 0.123 | 0.605 | 0.595 | 0.622 | 0.778 | 0.500 | 1.000 | 0.875 | 1.000 | 0.857 |
| <b>APP</b> | 466609   | 3 | 0.042 | 0.079 | 0.198 | 0.179 | 0.228 | 0.176 | 0.153 | 0.221 | 0.080 | 0.075 | 0.082 | 0.647 | 0.727 | 0.600 |
| <b>APP</b> | 12482753 | 3 | 1.000 | 0.857 | 0.520 | 0.667 | 0.778 | 0.605 | 0.568 | 0.654 | 0.056 | 0.059 | 0.112 | 0.354 | 0.370 | 0.565 |
| <b>APP</b> | 375369   | 1 | 1.000 | 0.519 | 0.778 | 0.692 | 0.778 | 0.361 | 0.378 | 0.425 | 0.386 | 0.441 | 0.889 | 0.688 | 0.484 | 0.455 |
| <b>APP</b> | 2830088  | 2 | 0.778 | 0.600 | 0.857 | 0.692 | 0.667 | 0.547 | 0.487 | 0.535 | 0.421 | 0.386 | 0.727 | 0.333 | 0.354 | 0.244 |
| <b>APP</b> | 17588612 | 2 | 0.857 | 1.000 | 1.000 | 1.000 | 0.889 | 0.302 | 0.179 | 0.299 | 0.483 | 0.421 | 0.600 | 0.813 | 0.857 | 0.929 |
| <b>APP</b> | 10460695 | 1 | 0.647 | 0.571 | 0.083 | 0.082 | 0.135 | 0.802 | 0.622 | 0.748 | 0.875 | 0.727 | 1.000 | 1.000 | 1.000 | 1.000 |
| <b>APP</b> | 2186302  | 2 | 0.340 | 0.247 | 0.778 | 0.400 | 0.421 | 0.849 | 0.919 | 0.787 | 1.000 | 0.818 | 0.889 | 0.469 | 0.231 | 0.200 |
| <b>APP</b> | 13049230 | 3 | 0.360 | 0.260 | 0.778 | 0.432 | 0.455 | 0.954 | 0.973 | 0.850 | 1.000 | 0.818 | 0.889 | 0.500 | 0.288 | 0.275 |
| <b>APP</b> | 370345   | 2 | 0.284 | 0.202 | 0.321 | 0.857 | 0.275 | 0.570 | 0.595 | 0.575 | 0.317 | 0.692 | 0.333 | 0.611 | 0.484 | 0.421 |
| <b>APP</b> | 6516727  | 3 | 0.312 | 0.235 | 0.857 | 0.857 | 0.455 | 0.721 | 0.811 | 0.740 | 0.483 | 0.444 | 0.692 | 0.519 | 0.253 | 0.353 |
| <b>APP</b> | 2830104  | 3 | 0.571 | 0.571 | 0.073 | 0.113 | 0.157 | 0.616 | 0.595 | 0.591 | 0.778 | 0.667 | 1.000 | 1.000 | 1.000 | 1.000 |
| <b>APP</b> | 462281   | 3 | 1.000 | 0.727 | 0.542 | 0.571 | 0.410 | 0.302 | 0.260 | 0.260 | 1.000 | 0.727 | 0.520 | 0.233 | 0.250 | 0.250 |
| <b>APP</b> | 466448   | 3 | 1.000 | 0.727 | 0.727 | 0.600 | 0.611 | 0.570 | 0.649 | 0.622 | 0.667 | 0.909 | 0.889 | 0.750 | 0.857 | 0.647 |
| <b>APP</b> | 438031   | 2 | 0.169 | 0.190 | 0.031 | 0.029 | 0.028 | 0.802 | 0.757 | 0.772 | 1.000 | 0.909 | 1.000 | 0.688 | 0.611 | 0.857 |
| <b>APP</b> | 2156079  | 1 | 0.117 | 0.114 | 0.400 | 0.857 | 0.354 | 0.954 | 0.919 | 0.961 | 1.000 | 0.909 | 0.889 | 0.079 | 0.168 | 0.085 |

**Table S2.** Linear Regression Analyses of Polymorphisms with Cognitive Phenotypes in LBC1936 dataset. Results shown are p values following adaptive permutation and were considered significant if  $p < 0.00056$ . The following abbreviations are used: GCA11, general cognitive ability at age 11 (MHT adjusted for age); GCA70, general cognitive ability at age 70 (MHT adjusted for age); LM, logical memory; MR, matrix reasoning; VF, verbal fluency.

| GENE        | dbSNP ID (rs) | Minor Allele | GCA11               |                     | GCA70               |        |                     |        | VF                  |        |                     |         | MR                  |        |                     |        | LM                  |        |                     |        |
|-------------|---------------|--------------|---------------------|---------------------|---------------------|--------|---------------------|--------|---------------------|--------|---------------------|---------|---------------------|--------|---------------------|--------|---------------------|--------|---------------------|--------|
|             |               |              | APOE $\epsilon$ 4 + | APOE $\epsilon$ 4 - | APOE $\epsilon$ 4 + |        | APOE $\epsilon$ 4 - |        | APOE $\epsilon$ 4 + |        | APOE $\epsilon$ 4 - |         | APOE $\epsilon$ 4 + |        | APOE $\epsilon$ 4 - |        | APOE $\epsilon$ 4 + |        | APOE $\epsilon$ 4 - |        |
|             |               |              | assoc               | assoc               | assoc               | GCA1 1 | assoc               | GCA1 1 | assoc               | GCA1 1 | asso c              | GCA1 11 | assoc               | GCA1 1 |
| <i>CR1</i>  | 9429940       | 4            | 0.40                | 0.32                | 0.29                | 0.50   | 0.73                | 0.67   | 0.79                | 0.63   | 0.91                | 0.92    | 1.00                | 0.97   | 0.78                | 0.73   | 0.60                | 0.91   | 0.79                | 0.79   |
| <i>CR1</i>  | 1571344       | 2            | 0.78                | 0.73                | 0.78                | 0.78   | 0.26                | 0.11   | 0.54                | 0.63   | 0.61                | 0.33    | 0.34                | 0.35   | 0.12                | 0.11   | 0.24                | 0.23   | 0.24                | 0.21   |
| <i>CR1</i>  | 2025935       | 4            | 1.00                | 0.54                | 0.54                | 0.57   | 0.40                | 0.17   | 0.02                | 0.03   | 0.09                | 0.04    | 0.20                | 0.14   | 0.42                | 0.82   | 0.80                | 1.00   | 0.36                | 0.35   |
| <i>CR1</i>  | 4310446       | 2            | 0.61                | 0.78                | 0.78                | 0.69   | 0.44                | 0.65   | 0.09                | 0.15   | 0.91                | 0.83    | 0.48                | 0.44   | 0.67                | 0.54   | 0.50                | 0.40   | 0.86                | 0.79   |
| <i>CR1</i>  | 11117959      | 3            | 0.86                | 0.78                | 0.69                | 0.52   | 0.78                | 0.60   | 0.18                | 0.11   | 0.73                | 0.83    | 0.90                | 0.79   | 0.54                | 0.33   | 0.20                | 0.18   | 0.40                | 0.52   |
| <i>CR1</i>  | 6656401       | 1            | 0.86                | 0.86                | 0.60                | 0.73   | 0.21                | 0.26   | 0.67                | 0.89   | 0.13                | 0.14    | 0.91                | 1.00   | 0.69                | 0.43   | 0.24                | 0.26   | 0.81                | 0.83   |
| <i>CR1</i>  | 10127904      | 3            | 1.00                | 1.00                | 0.78                | 1.00   | 1.00                | 0.21   | 0.21                | 0.24   | 0.21                | 0.08    | 0.31                | 0.32   | 0.57                | 0.61   | 0.80                | 0.91   | 1.00                | 0.71   |
| <i>CR1</i>  | 650877        | 3            | 0.86                | 0.67                | 0.69                | 0.61   | 0.78                | 0.86   | 0.20                | 0.12   | 0.54                | 0.92    | 0.90                | 0.77   | 0.61                | 0.40   | 0.16                | 0.21   | 0.57                | 0.52   |
| <i>CR1</i>  | 3818361       | 4            | 0.86                | 0.12                | 0.44                | 0.52   | 0.10                | 0.20   | 0.52                | 0.78   | 0.05                | 0.07    | 0.91                | 1.00   | 0.32                | 0.30   | 0.52                | 0.54   | 0.68                | 0.67   |
| <i>PS2</i>  | 1150895       | 2            | 0.28                | 0.15                | 1.00                | 0.86   | 0.41                | 0.65   | 0.06                | 0.03   | 0.57                | 0.57    | 0.86                | 1.00   | 0.89                | 0.91   | 0.87                | 0.73   | 0.22                | 0.13   |
| <i>PS2</i>  | 2073489       | 4            | 0.73                | 0.28                | 0.54                | 0.32   | 0.13                | 0.30   | 0.02                | 0.03   | 0.82                | 0.92    | 0.93                | 0.92   | 0.73                | 0.40   | 0.30                | 0.32   | 1.00                | 0.79   |
| <i>PS2</i>  | 1295640       | 2            | 0.61                | 0.35                | 0.54                | 0.57   | 0.09                | 0.23   | 0.05                | 0.03   | 0.11                | 0.18    | 0.52                | 0.59   | 0.78                | 0.73   | 0.23                | 0.17   | 0.45                | 0.48   |
| <i>PS2</i>  | 2802268       | 3            | 0.33                | 0.08                | 0.10                | 0.36   | 0.01                | 0.05   | 0.14                | 0.26   | 0.73                | 0.60    | 0.86                | 0.92   | 0.44                | 0.27   | 0.80                | 0.82   | 0.93                | 0.71   |
| <i>PS2</i>  | 16846644      | 4            | 0.61                | 0.86                | 1.00                | 0.86   | 0.28                | 0.52   | 0.35                | 0.25   | 0.16                | 0.18    | 0.62                | 0.54   | 0.89                | 0.73   | 0.41                | 0.36   | 0.71                | 0.79   |
| <i>PS2</i>  | 12126925      | 1            | 0.39                | 0.69                | 0.54                | 0.69   | 0.78                | 0.73   | 0.98                | 0.93   | 0.43                | 0.57    | 0.86                | 0.90   | 0.27                | 0.67   | 0.93                | 0.82   | 0.93                | 0.93   |
| <i>BIN1</i> | 4662703       | 3            | 0.86                | 0.86                | 0.78                | 0.86   | 0.45                | 0.36   | 0.86                | 0.59   | 0.43                | 0.36    | 0.78                | 0.48   | 1.00                | 1.00   | 0.78                | 0.52   | 0.86                | 0.86   |
| <i>BIN1</i> | 880436        | 4            | 1.00                | 0.78                | 0.86                | 1.00   | 0.48                | 0.40   | 0.52                | 0.59   | 0.48                | 0.50    | 0.73                | 0.73   | 1.00                | 1.00   | 0.78                | 0.78   | 1.00                | 1.00   |
| <i>BIN1</i> | 3768857       | 1            | 0.59                | 0.63                | 0.58                | 0.86   | 0.73                | 1.00   | 0.05                | 0.11   | 0.34                | 0.67    | 0.78                | 0.86   | 0.38                | 0.44   | 1.00                | 0.38   | 0.86                | 0.86   |
| <i>BIN1</i> | 17014873      | 2            | 0.04                | 0.30                | 0.06                | 0.01   | 0.25                | 0.39   | 0.73                | 1.00   | 0.01                | 0.02    | 0.18                | 0.12   | 0.78                | 0.86   | 0.09                | 0.05   | 0.55                | 0.48   |
| <i>BIN1</i> | 2276575       | 3            | 0.16                | 0.07                | 0.86                | 0.67   | 0.43                | 0.86   | 0.15                | 0.06   | 0.15                | 0.29    | 0.86                | 1.00   | 0.23                | 0.78   | 0.78                | 1.00   | 0.14                | 0.18   |
| <i>BIN1</i> | 13430599      | 4            | 0.16                | 0.07                | 0.86                | 0.67   | 0.43                | 0.86   | 0.15                | 0.06   | 0.15                | 0.29    | 0.86                | 1.00   | 0.23                | 0.78   | 0.78                | 1.00   | 0.14                | 0.18   |
| <i>BIN1</i> | 10194375      | 1            | 0.38                | 0.36                | 0.86                | 0.86   | 0.40                | 0.86   | 0.50                | 0.21   | 0.23                | 0.24    | 1.00                | 0.86   | 0.10                | 0.09   | 0.67                | 0.73   | 0.21                | 0.38   |
| <i>BIN1</i> | 13426725      | 2            | 0.17                | 0.07                | 0.78                | 0.86   | 0.41                | 0.73   | 0.14                | 0.06   | 0.10                | 0.13    | 1.00                | 1.00   | 0.20                | 0.18   | 0.58                | 1.00   | 0.15                | 0.16   |
| <i>BIN1</i> | 10200967      | 2            | 1.00                | 0.19                | 0.12                | 0.03   | 0.02                | 0.03   | 1.00                | 0.45   | 0.52                | 0.67    | 0.38                | 0.48   | 0.04                | 0.05   | 0.78                | 1.00   | 0.86                | 1.00   |
| <i>BIN1</i> | 17014923      | 4            | 0.09                | 1.00                | 0.04                | 0.00   | 0.35                | 0.20   | 0.10                | 0.04   | 0.73                | 0.67    | 0.63                | 0.64   | 0.38                | 0.44   | 0.03                | 0.01   | 0.67                | 0.86   |
| <i>BIN1</i> | 6709337       | 1            | 0.35                | 1.00                | 0.12                | 0.04   | 0.40                | 0.23   | 0.25                | 0.05   | 0.86                | 0.86    | 0.86                | 0.59   | 0.48                | 0.32   | 0.35                | 0.73   | 0.37                | 0.20   |
| <i>BIN1</i> | 11678252      | 3            | 0.11                | 0.58                | 0.05                | 0.02   | 0.38                | 0.28   | 0.11                | 0.06   | 0.86                | 0.67    | 0.78                | 0.52   | 0.64                | 0.63   | 0.27                | 0.30   | 1.00                | 0.86   |

|               |          |   |      |      |      |      |      |      |      |      |      |      |      |      |      |      |      |      |      |      |
|---------------|----------|---|------|------|------|------|------|------|------|------|------|------|------|------|------|------|------|------|------|------|
| <b>BIN1</b>   | 873270   | 3 | 0.33 | 0.67 | 0.73 | 1.00 | 0.73 | 0.67 | 0.86 | 0.78 | 0.73 | 0.67 | 0.86 | 1.00 | 0.78 | 0.86 | 0.02 | 0.04 | 0.27 | 0.21 |
| <b>BIN1</b>   | 749008   | 2 | 0.52 | 0.67 | 0.33 | 0.02 | 0.36 | 0.33 | 0.23 | 0.09 | 0.78 | 0.78 | 0.86 | 0.86 | 1.00 | 0.86 | 0.86 | 0.86 | 0.16 | 0.13 |
| <b>BIN1</b>   | 6743470  | 4 | 0.30 | 1.00 | 0.11 | 0.02 | 0.22 | 0.23 | 0.08 | 0.05 | 0.63 | 0.50 | 1.00 | 0.86 | 0.73 | 1.00 | 0.06 | 0.03 | 0.63 | 0.52 |
| <b>BIN1</b>   | 4663098  | 4 | 0.78 | 0.67 | 0.07 | 0.02 | 0.17 | 0.13 | 0.52 | 0.30 | 1.00 | 0.78 | 0.86 | 1.00 | 0.08 | 0.06 | 0.59 | 0.86 | 1.00 | 0.86 |
| <b>BIN1</b>   | 744373   | 3 | 1.00 | 0.57 | 0.86 | 0.67 | 1.00 | 1.00 | 0.80 | 0.65 | 0.75 | 0.43 | 0.50 | 0.54 | 0.69 | 0.77 | 0.18 | 0.17 | 0.87 | 0.61 |
| <b>CLU</b>    | 7012010  | 2 | 0.86 | 0.16 | 1.00 | 0.73 | 0.21 | 0.08 | 0.10 | 0.19 | 0.57 | 0.75 | 0.72 | 0.90 | 0.02 | 0.01 | 1.00 | 0.91 | 0.71 | 0.43 |
| <b>CLU</b>    | 10101779 | 2 | 0.47 | 0.27 | 1.00 | 0.73 | 0.26 | 0.10 | 0.20 | 0.30 | 0.57 | 0.83 | 0.69 | 0.90 | 0.03 | 0.01 | 0.87 | 0.73 | 0.86 | 1.00 |
| <b>CLU</b>    | 10503814 | 4 | 1.00 | 0.52 | 0.21 | 0.41 | 0.44 | 0.69 | 0.63 | 0.90 | 0.91 | 0.60 | 0.86 | 0.77 | 0.89 | 0.91 | 0.29 | 0.20 | 0.67 | 0.79 |
| <b>CLU</b>    | 11136000 | 4 | 0.37 | 0.23 | 0.54 | 0.86 | 0.43 | 0.31 | 0.05 | 0.04 | 0.50 | 0.75 | 0.86 | 0.97 | 0.57 | 0.31 | 0.80 | 0.91 | 0.44 | 0.47 |
| <b>CLU</b>    | 9314349  | 3 | 0.23 | 0.25 | 0.29 | 0.16 | 1.00 | 0.78 | 0.70 | 0.56 | 0.33 | 0.39 | 0.72 | 0.49 | 0.32 | 0.26 | 0.17 | 0.30 | 0.22 | 0.22 |
| <b>CLU</b>    | 492638   | 4 | 0.40 | 0.44 | 0.35 | 0.78 | 0.86 | 1.00 | 0.22 | 0.45 | 0.22 | 0.14 | 0.79 | 0.51 | 0.67 | 0.45 | 0.61 | 0.24 | 0.24 | 0.24 |
| <b>PICALM</b> | 10898425 | 4 | 0.12 | 0.78 | 1.00 | 0.78 | 0.50 | 0.45 | 0.13 | 0.12 | 0.32 | 0.22 | 0.48 | 0.49 | 0.89 | 0.73 | 0.67 | 0.82 | 0.79 | 0.50 |
| <b>PICALM</b> | 618679   | 4 | 0.52 | 0.86 | 0.89 | 1.00 | 0.69 | 1.00 | 0.59 | 0.35 | 0.73 | 0.92 | 0.83 | 0.69 | 0.25 | 0.23 | 0.54 | 0.52 | 0.15 | 0.13 |
| <b>PICALM</b> | 2077815  | 3 | 0.52 | 0.86 | 0.89 | 1.00 | 0.69 | 1.00 | 0.59 | 0.35 | 0.73 | 1.00 | 0.83 | 0.69 | 0.18 | 0.23 | 0.54 | 0.52 | 0.14 | 0.11 |
| <b>PICALM</b> | 10898427 | 3 | 0.11 | 0.86 | 0.18 | 0.20 | 0.08 | 0.02 | 0.25 | 0.28 | 0.19 | 0.11 | 0.18 | 0.24 | 0.03 | 0.01 | 0.35 | 0.33 | 0.33 | 0.30 |
| <b>PICALM</b> | 11234495 | 4 | 0.15 | 1.00 | 0.40 | 0.32 | 0.07 | 0.01 | 0.39 | 0.28 | 0.57 | 0.25 | 0.07 | 0.18 | 0.10 | 0.07 | 0.61 | 0.73 | 0.65 | 0.18 |
| <b>PICALM</b> | 510566   | 1 | 0.44 | 0.60 | 0.89 | 0.47 | 0.86 | 0.86 | 0.88 | 0.43 | 1.00 | 1.00 | 0.43 | 0.59 | 1.00 | 0.91 | 0.40 | 0.82 | 0.79 | 0.79 |
| <b>PICALM</b> | 10501602 | 3 | 0.36 | 0.23 | 0.78 | 0.78 | 0.11 | 0.03 | 0.21 | 0.20 | 0.17 | 0.04 | 0.72 | 0.74 | 0.45 | 0.35 | 0.80 | 0.73 | 0.04 | 0.02 |
| <b>PICALM</b> | 10501604 | 1 | 0.78 | 1.00 | 0.78 | 0.32 | 0.11 | 0.05 | 0.53 | 0.39 | 0.18 | 0.10 | 0.03 | 0.06 | 0.06 | 0.02 | 0.65 | 0.73 | 0.28 | 0.30 |
| <b>PICALM</b> | 713346   | 2 | 0.18 | 1.00 | 1.00 | 1.00 | 0.33 | 0.09 | 0.76 | 0.86 | 0.50 | 0.32 | 0.66 | 0.67 | 0.09 | 0.05 | 1.00 | 0.91 | 0.67 | 0.50 |
| <b>PICALM</b> | 475639   | 2 | 0.07 | 0.73 | 0.41 | 0.78 | 0.21 | 0.06 | 0.53 | 0.68 | 0.91 | 0.57 | 0.76 | 0.56 | 0.16 | 0.15 | 0.35 | 0.44 | 0.26 | 0.20 |
| <b>PICALM</b> | 669336   | 1 | 0.31 | 0.48 | 0.06 | 0.21 | 1.00 | 1.00 | 0.44 | 0.85 | 0.82 | 0.92 | 0.59 | 0.95 | 0.57 | 0.82 | 0.05 | 0.09 | 0.61 | 0.44 |
| <b>PICALM</b> | 7938033  | 2 | 0.21 | 0.33 | 0.28 | 0.52 | 0.52 | 0.78 | 0.84 | 1.00 | 0.21 | 0.32 | 0.72 | 0.74 | 1.00 | 0.91 | 0.73 | 0.91 | 0.65 | 0.67 |
| <b>PICALM</b> | 10792820 | 2 | 0.17 | 1.00 | 0.89 | 0.86 | 0.30 | 0.05 | 0.89 | 0.90 | 0.48 | 0.35 | 0.55 | 0.51 | 0.12 | 0.07 | 0.80 | 0.82 | 0.67 | 0.45 |
| <b>PICALM</b> | 527162   | 2 | 0.52 | 1.00 | 0.89 | 1.00 | 0.69 | 0.86 | 0.59 | 0.35 | 0.65 | 0.75 | 0.83 | 0.69 | 0.20 | 0.27 | 0.54 | 0.52 | 0.11 | 0.10 |
| <b>PICALM</b> | 680119   | 4 | 0.28 | 0.31 | 0.19 | 0.35 | 0.57 | 1.00 | 0.52 | 0.44 | 0.39 | 0.57 | 0.76 | 0.69 | 0.69 | 0.82 | 0.80 | 1.00 | 0.86 | 0.79 |
| <b>PICALM</b> | 10792821 | 2 | 0.10 | 0.86 | 0.18 | 0.21 | 0.06 | 0.02 | 0.30 | 0.29 | 0.19 | 0.12 | 0.17 | 0.27 | 0.04 | 0.02 | 0.32 | 0.28 | 0.33 | 0.24 |
| <b>PICALM</b> | 642949   | 2 | 0.01 | 1.00 | 0.11 | 0.26 | 0.37 | 0.13 | 0.14 | 0.35 | 0.91 | 0.67 | 0.97 | 0.62 | 0.22 | 0.13 | 0.09 | 0.20 | 0.67 | 0.54 |
| <b>PICALM</b> | 666682   | 2 | 0.10 | 0.86 | 0.69 | 1.00 | 0.25 | 0.12 | 0.60 | 0.78 | 1.00 | 0.75 | 0.79 | 0.59 | 0.28 | 0.28 | 0.45 | 0.42 | 0.29 | 0.19 |
| <b>PICALM</b> | 664629   | 3 | 0.35 | 0.86 | 0.25 | 0.86 | 0.15 | 0.19 | 0.73 | 0.38 | 0.24 | 0.14 | 0.21 | 0.41 | 0.65 | 0.48 | 0.16 | 0.32 | 0.30 | 0.32 |
| <b>PICALM</b> | 17745273 | 3 | 0.43 | 0.30 | 0.16 | 0.25 | 0.78 | 0.78 | 0.80 | 0.99 | 0.82 | 1.00 | 0.72 | 0.69 | 0.57 | 1.00 | 0.80 | 1.00 | 0.10 | 0.12 |
| <b>PICALM</b> | 1941375  | 3 | 0.11 | 0.60 | 0.69 | 0.78 | 1.00 | 1.00 | 0.79 | 0.76 | 0.73 | 0.75 | 0.08 | 0.17 | 0.89 | 1.00 | 0.06 | 0.13 | 1.00 | 0.79 |
| <b>PICALM</b> | 677909   | 3 | 0.27 | 0.61 | 1.00 | 0.86 | 0.16 | 0.11 | 0.72 | 0.74 | 0.61 | 0.83 | 1.00 | 1.00 | 0.16 | 0.18 | 0.54 | 0.50 | 0.01 | 0.01 |
| <b>PICALM</b> | 11234532 | 1 | 0.32 | 0.86 | 0.61 | 0.45 | 0.47 | 0.14 | 0.09 | 0.11 | 0.05 | 0.02 | 0.09 | 0.13 | 0.12 | 0.10 | 0.87 | 1.00 | 0.71 | 0.28 |

|                   |          |   |      |      |      |      |      |      |      |      |      |      |      |      |      |      |      |      |      |      |
|-------------------|----------|---|------|------|------|------|------|------|------|------|------|------|------|------|------|------|------|------|------|------|
| <i>PICALM</i>     | 10501608 | 1 | 0.78 | 1.00 | 0.78 | 0.32 | 0.09 | 0.04 | 0.52 | 0.34 | 0.16 | 0.09 | 0.03 | 0.06 | 0.07 | 0.03 | 0.67 | 0.82 | 0.28 | 0.24 |
| <i>PICALM</i>     | 669556   | 3 | 0.52 | 1.00 | 0.89 | 1.00 | 0.86 | 0.86 | 0.59 | 0.35 | 0.65 | 0.65 | 0.83 | 0.69 | 0.28 | 0.27 | 0.54 | 0.52 | 0.23 | 0.18 |
| <i>PICALM</i>     | 621942   | 4 | 0.35 | 0.69 | 1.00 | 0.52 | 0.73 | 1.00 | 0.62 | 1.00 | 0.91 | 0.92 | 0.12 | 0.17 | 0.89 | 0.91 | 0.47 | 1.00 | 0.79 | 0.79 |
| <i>PICALM</i>     | 536841   | 2 | 0.48 | 0.86 | 0.78 | 0.39 | 0.21 | 0.16 | 0.66 | 0.65 | 0.73 | 0.75 | 0.93 | 0.97 | 0.23 | 0.21 | 0.57 | 0.57 | 0.02 | 0.01 |
| <i>PICALM</i>     | 541458   | 2 | 0.86 | 0.57 | 0.60 | 0.41 | 0.18 | 0.11 | 0.57 | 0.78 | 0.48 | 0.48 | 0.91 | 1.00 | 0.26 | 0.20 | 0.60 | 0.52 | 0.02 | 0.01 |
| <i>PICALM</i>     | 3851179  | 1 | 0.86 | 0.86 | 0.04 | 0.08 | 0.52 | 0.61 | 0.31 | 0.78 | 0.57 | 0.82 | 0.82 | 0.89 | 0.92 | 1.00 | 0.73 | 1.00 | 0.48 | 0.18 |
| <i>PS1</i>        | 362412   | 4 | 0.86 | 0.47 | 1.00 | 0.78 | 0.26 | 0.39 | 0.58 | 0.66 | 0.73 | 0.52 | 0.24 | 0.15 | 0.52 | 0.60 | 0.87 | 0.69 | 0.22 | 0.40 |
| <i>PS1</i>        | 214273   | 4 | 0.78 | 1.00 | 0.69 | 0.73 | 0.86 | 1.00 | 0.95 | 0.99 | 0.67 | 0.47 | 0.44 | 0.40 | 0.33 | 0.52 | 0.40 | 0.45 | 0.08 | 0.09 |
| <i>PS1</i>        | 8006497  | 3 | 0.02 | 1.00 | 0.13 | 0.14 | 0.86 | 1.00 | 0.68 | 0.69 | 0.21 | 0.35 | 0.13 | 0.11 | 0.89 | 0.73 | 0.12 | 0.10 | 0.01 | 0.01 |
| <i>PS1</i>        | 362350   | 3 | 0.52 | 0.61 | 0.78 | 0.86 | 0.08 | 0.14 | 0.62 | 0.90 | 0.73 | 0.92 | 0.21 | 0.17 | 0.89 | 0.91 | 0.21 | 0.12 | 0.86 | 0.52 |
| <i>PS1</i>        | 214260   | 1 | 1.00 | 0.44 | 0.78 | 0.78 | 1.00 | 1.00 | 0.77 | 0.65 | 0.50 | 0.60 | 0.86 | 0.92 | 0.60 | 0.40 | 0.93 | 0.82 | 0.37 | 0.27 |
| <i>PS1</i>        | 165933   | 4 | 0.73 | 1.00 | 0.89 | 1.00 | 1.00 | 1.00 | 0.79 | 0.88 | 0.40 | 0.60 | 0.97 | 0.97 | 1.00 | 0.69 | 0.87 | 1.00 | 0.79 | 0.67 |
| <i>PS1</i>        | 362377   | 1 | 1.00 | 0.12 | 0.50 | 0.35 | 0.16 | 0.33 | 0.48 | 0.54 | 0.35 | 0.50 | 0.10 | 0.11 | 0.11 | 0.18 | 0.35 | 0.21 | 0.26 | 0.57 |
| <i>PS1</i>        | 165935   | 3 | 0.17 | 1.00 | 0.73 | 1.00 | 1.00 | 0.86 | 0.51 | 0.74 | 0.60 | 0.83 | 0.86 | 0.72 | 0.60 | 0.52 | 0.73 | 1.00 | 0.61 | 0.65 |
| <i>PS1</i>        | 362346   | 1 | 1.00 | 0.12 | 0.50 | 0.35 | 0.19 | 0.35 | 0.48 | 0.54 | 0.33 | 0.50 | 0.10 | 0.11 | 0.11 | 0.21 | 0.35 | 0.21 | 0.40 | 0.57 |
| <i>TRAPPC6A</i>   | 7247764  | 2 | 0.02 | 0.23 | 0.58 | 1.00 | 0.02 | 0.01 | 0.64 | 0.78 | 0.09 | 0.05 | 0.07 | 0.13 | 0.02 | 0.01 | 0.44 | 0.63 | 0.27 | 0.11 |
| <i>TRAPPC6A</i>   | 28555639 | 1 | 0.59 | 0.86 | 1.00 | 0.59 | 0.16 | 0.12 | 0.48 | 0.64 | 0.29 | 0.45 | 0.86 | 1.00 | 0.08 | 0.11 | 0.73 | 1.00 | 0.86 | 0.86 |
| <i>TRAPPC6A</i>   | 12460041 | 2 | 0.11 | 0.41 | 0.59 | 1.00 | 0.08 | 0.05 | 0.40 | 0.21 | 0.41 | 0.67 | 0.15 | 0.30 | 0.11 | 0.12 | 0.32 | 0.78 | 0.28 | 0.50 |
| <i>intergenic</i> | 2627641  | 2 | 1.00 | 0.52 | 0.28 | 0.33 | 0.86 | 0.55 | 0.86 | 1.00 | 0.64 | 0.78 | 0.86 | 0.64 | 0.26 | 0.20 | 0.30 | 0.20 | 0.64 | 0.43 |
| <i>intergenic</i> | 597668   | 2 | 1.00 | 0.55 | 0.28 | 0.33 | 0.86 | 0.55 | 0.86 | 1.00 | 0.73 | 0.78 | 0.86 | 0.64 | 0.26 | 0.20 | 0.30 | 0.20 | 0.78 | 0.43 |
| <i>EXOC3L2</i>    | 10422797 | 2 | 0.73 | 0.86 | 0.59 | 0.23 | 0.63 | 0.59 | 0.10 | 0.08 | 0.33 | 0.43 | 1.00 | 1.00 | 0.58 | 0.86 | 0.67 | 0.48 | 0.18 | 0.22 |
| <i>EXOC3L2</i>    | 346763   | 1 | 0.63 | 0.78 | 0.78 | 0.27 | 0.67 | 0.52 | 0.06 | 0.05 | 0.27 | 0.43 | 0.78 | 1.00 | 0.73 | 0.86 | 0.86 | 0.73 | 0.18 | 0.23 |
| <i>intergenic</i> | 17356664 | 4 | 1.00 | 0.16 | 0.15 | 0.24 | 0.48 | 0.30 | 1.00 | 1.00 | 0.15 | 0.12 | 0.52 | 0.86 | 0.48 | 0.25 | 0.46 | 0.50 | 1.00 | 1.00 |
| <i>MARK4</i>      | 10445572 | 3 | 0.52 | 0.86 | 0.73 | 0.86 | 0.58 | 0.63 | 0.78 | 1.00 | 0.20 | 0.33 | 0.58 | 0.78 | 0.09 | 0.08 | 0.14 | 0.23 | 0.86 | 0.86 |
| <i>MARK4</i>      | 2240672  | 1 | 1.00 | 0.67 | 0.36 | 0.38 | 0.64 | 1.00 | 0.23 | 0.16 | 0.86 | 1.00 | 1.00 | 1.00 | 0.13 | 0.28 | 0.86 | 0.73 | 0.12 | 0.08 |
| <i>MARK4</i>      | 345409   | 2 | 0.86 | 0.19 | 0.59 | 0.59 | 0.50 | 0.36 | 0.37 | 0.22 | 0.73 | 0.86 | 0.78 | 1.00 | 0.03 | 0.04 | 0.45 | 0.59 | 0.86 | 0.63 |
| <i>MARK4</i>      | 11883302 | 2 | 0.43 | 0.06 | 0.30 | 0.25 | 0.06 | 0.15 | 1.00 | 0.73 | 0.02 | 0.03 | 0.78 | 0.73 | 0.00 | 0.00 | 0.08 | 0.06 | 0.55 | 0.86 |
| <i>MARK4</i>      | 344807   | 4 | 0.39 | 0.86 | 0.86 | 0.64 | 0.63 | 0.67 | 0.19 | 0.21 | 1.00 | 0.86 | 0.52 | 0.52 | 0.29 | 0.30 | 0.27 | 0.26 | 0.63 | 0.73 |
| <i>MARK4</i>      | 2306660  | 2 | 0.45 | 0.08 | 0.30 | 0.42 | 0.17 | 0.33 | 0.27 | 0.24 | 0.06 | 0.12 | 0.64 | 0.86 | 0.00 | 0.01 | 0.78 | 0.64 | 0.50 | 0.63 |
| <i>CKM</i>        | 8111989  | 2 | 1.00 | 0.01 | 0.33 | 0.28 | 0.10 | 0.15 | 0.64 | 0.64 | 0.14 | 0.17 | 0.33 | 0.52 | 0.06 | 0.07 | 0.40 | 0.52 | 0.73 | 0.86 |
| <i>CKM</i>        | 7260463  | 4 | 1.00 | 0.04 | 0.59 | 0.46 | 0.17 | 0.25 | 0.44 | 0.41 | 0.22 | 0.29 | 0.39 | 0.59 | 0.09 | 0.13 | 0.28 | 0.41 | 1.00 | 1.00 |
| <i>APP</i>        | 2829961  | 2 | 0.78 | 0.78 | 0.89 | 0.15 | 0.30 | 0.23 | 0.24 | 0.06 | 1.00 | 1.00 | 0.66 | 0.95 | 0.54 | 0.44 | 0.73 | 0.50 | 0.67 | 0.61 |
| <i>APP</i>        | 3787620  | 2 | 0.78 | 0.25 | 0.43 | 0.15 | 0.86 | 0.86 | 0.78 | 0.99 | 0.82 | 0.83 | 0.55 | 0.39 | 0.78 | 0.91 | 0.87 | 0.73 | 0.30 | 0.34 |
| <i>APP</i>        | 373521   | 1 | 0.78 | 0.45 | 0.57 | 0.08 | 0.48 | 0.50 | 0.38 | 0.16 | 0.91 | 0.92 | 0.66 | 1.00 | 0.67 | 1.00 | 0.57 | 0.27 | 0.93 | 0.61 |

|     |          |   |      |      |      |      |      |      |      |      |      |      |      |      |      |      |      |      |      |      |
|-----|----------|---|------|------|------|------|------|------|------|------|------|------|------|------|------|------|------|------|------|------|
| APP | 2829973  | 3 | 0.78 | 1.00 | 0.65 | 0.27 | 0.42 | 0.33 | 0.07 | 0.04 | 0.65 | 0.57 | 0.69 | 0.79 | 0.73 | 0.82 | 0.61 | 0.42 | 0.86 | 0.71 |
| APP | 1783025  | 2 | 0.52 | 0.44 | 0.48 | 0.23 | 0.78 | 0.78 | 0.44 | 0.61 | 0.91 | 0.83 | 0.97 | 0.79 | 0.89 | 0.73 | 0.54 | 0.73 | 0.93 | 1.00 |
| APP | 380417   | 4 | 0.06 | 0.33 | 0.02 | 0.04 | 0.40 | 0.48 | 0.00 | 0.01 | 0.57 | 0.44 | 0.83 | 0.97 | 0.39 | 0.31 | 0.02 | 0.04 | 1.00 | 1.00 |
| APP | 1787438  | 4 | 0.34 | 0.54 | 0.15 | 0.37 | 0.57 | 0.61 | 0.21 | 0.39 | 1.00 | 0.92 | 1.00 | 0.77 | 1.00 | 0.91 | 0.93 | 1.00 | 0.14 | 0.19 |
| APP | 17001492 | 2 | 0.24 | 0.12 | 0.22 | 0.11 | 1.00 | 0.86 | 0.11 | 0.12 | 0.02 | 0.02 | 0.66 | 0.69 | 0.05 | 0.06 | 0.02 | 0.01 | 0.23 | 0.48 |
| APP | 1783016  | 4 | 1.00 | 0.86 | 0.27 | 0.42 | 0.54 | 0.86 | 0.18 | 0.26 | 0.33 | 0.42 | 0.69 | 0.79 | 0.15 | 0.12 | 0.87 | 0.82 | 0.79 | 0.93 |
| APP | 396969   | 1 | 0.20 | 0.48 | 0.12 | 0.40 | 0.86 | 0.86 | 0.30 | 0.63 | 1.00 | 0.92 | 0.72 | 0.95 | 0.78 | 0.82 | 0.40 | 0.91 | 0.65 | 0.67 |
| APP | 214488   | 2 | 0.02 | 0.14 | 0.04 | 0.07 | 0.86 | 1.00 | 0.01 | 0.02 | 0.54 | 0.44 | 0.41 | 0.74 | 0.36 | 0.26 | 0.01 | 0.03 | 1.00 | 0.67 |
| APP | 383700   | 1 | 0.20 | 0.48 | 0.12 | 0.40 | 0.86 | 0.86 | 0.30 | 0.63 | 1.00 | 0.92 | 0.72 | 0.95 | 0.78 | 0.82 | 0.40 | 0.91 | 0.65 | 0.67 |
| APP | 2829984  | 4 | 0.14 | 0.50 | 0.27 | 0.20 | 0.78 | 1.00 | 0.04 | 0.04 | 0.54 | 0.30 | 0.72 | 0.79 | 0.22 | 0.09 | 0.01 | 0.01 | 0.45 | 0.57 |
| APP | 2234983  | 1 | 0.65 | 0.86 | 0.22 | 0.23 | 0.44 | 1.00 | 0.55 | 0.40 | 0.73 | 0.83 | 0.41 | 0.46 | 0.89 | 0.82 | 0.14 | 0.07 | 1.00 | 0.86 |
| APP | 216779   | 2 | 0.31 | 0.86 | 0.44 | 0.57 | 1.00 | 0.73 | 0.02 | 0.02 | 0.18 | 0.21 | 0.62 | 0.69 | 0.38 | 0.47 | 0.20 | 0.15 | 0.79 | 0.67 |
| APP | 400603   | 3 | 0.05 | 0.60 | 0.11 | 0.33 | 0.44 | 0.52 | 0.14 | 0.43 | 0.73 | 0.83 | 0.52 | 0.85 | 0.89 | 1.00 | 0.14 | 0.40 | 0.79 | 0.71 |
| APP | 2829997  | 3 | 0.02 | 0.40 | 0.65 | 0.86 | 0.78 | 0.52 | 0.14 | 0.28 | 0.82 | 0.42 | 0.23 | 0.40 | 1.00 | 0.73 | 0.87 | 0.91 | 0.86 | 0.71 |
| APP | 440666   | 4 | 0.05 | 0.48 | 1.00 | 0.48 | 0.28 | 0.48 | 0.78 | 0.86 | 0.69 | 0.83 | 0.18 | 0.40 | 0.67 | 0.91 | 0.73 | 0.33 | 1.00 | 0.57 |
| APP | 2014146  | 3 | 0.29 | 1.00 | 0.73 | 0.52 | 0.86 | 1.00 | 0.97 | 0.84 | 0.17 | 0.29 | 0.83 | 0.82 | 0.78 | 0.73 | 0.13 | 0.12 | 0.50 | 0.40 |
| APP | 216762   | 4 | 0.78 | 0.86 | 0.42 | 0.45 | 0.67 | 1.00 | 0.25 | 0.30 | 0.24 | 0.38 | 0.79 | 0.85 | 1.00 | 0.91 | 0.01 | 0.01 | 0.79 | 0.54 |
| APP | 2070657  | 3 | 0.50 | 1.00 | 0.33 | 0.50 | 0.41 | 0.86 | 0.47 | 0.60 | 0.37 | 0.45 | 0.93 | 0.82 | 1.00 | 0.57 | 0.20 | 0.41 | 1.00 | 0.86 |
| APP | 7276036  | 1 | 0.57 | 1.00 | 0.35 | 0.86 | 0.24 | 0.60 | 0.19 | 0.24 | 0.28 | 0.25 | 0.86 | 0.74 | 0.89 | 0.73 | 0.17 | 0.48 | 0.86 | 0.61 |
| APP | 2830000  | 1 | 0.57 | 1.00 | 0.35 | 0.86 | 0.24 | 0.65 | 0.19 | 0.24 | 0.28 | 0.27 | 0.86 | 0.74 | 0.89 | 1.00 | 0.17 | 0.48 | 1.00 | 0.57 |
| APP | 2830001  | 1 | 0.86 | 0.61 | 0.89 | 0.78 | 0.48 | 0.38 | 0.23 | 0.12 | 0.37 | 0.52 | 0.59 | 0.77 | 0.61 | 0.61 | 0.87 | 1.00 | 0.39 | 0.39 |
| APP | 7278838  | 1 | 1.00 | 0.86 | 1.00 | 1.00 | 0.18 | 0.22 | 0.47 | 0.53 | 0.02 | 0.03 | 0.69 | 0.72 | 0.21 | 0.28 | 0.12 | 0.18 | 0.60 | 0.93 |
| APP | 2830008  | 2 | 0.86 | 1.00 | 0.78 | 0.73 | 0.27 | 0.23 | 0.89 | 0.84 | 0.04 | 0.09 | 0.52 | 0.41 | 0.39 | 0.65 | 0.21 | 0.22 | 0.18 | 0.24 |
| APP | 2830012  | 1 | 0.60 | 0.78 | 0.78 | 0.48 | 0.35 | 0.36 | 0.75 | 0.83 | 0.03 | 0.03 | 0.45 | 0.46 | 0.73 | 0.69 | 0.73 | 0.82 | 0.13 | 0.14 |
| APP | 2226330  | 1 | 0.86 | 0.52 | 0.89 | 0.73 | 0.61 | 0.57 | 0.26 | 0.20 | 0.73 | 0.92 | 0.79 | 0.72 | 0.52 | 0.67 | 0.40 | 0.69 | 0.27 | 0.26 |
| APP | 2830017  | 4 | 0.86 | 0.52 | 0.89 | 0.73 | 0.57 | 0.42 | 0.26 | 0.20 | 0.82 | 0.75 | 0.79 | 0.67 | 0.78 | 0.73 | 0.40 | 0.69 | 0.21 | 0.26 |
| APP | 2830018  | 3 | 0.86 | 0.52 | 0.89 | 0.73 | 0.57 | 0.42 | 0.26 | 0.20 | 0.82 | 0.75 | 0.79 | 0.72 | 0.78 | 0.73 | 0.40 | 0.69 | 0.21 | 0.26 |
| APP | 768039   | 4 | 1.00 | 1.00 | 0.45 | 0.32 | 0.86 | 1.00 | 0.39 | 0.23 | 0.09 | 0.08 | 0.45 | 0.49 | 1.00 | 0.82 | 0.50 | 0.47 | 0.43 | 0.48 |
| APP | 2830028  | 4 | 0.39 | 0.32 | 0.04 | 0.04 | 0.02 | 0.01 | 0.14 | 0.17 | 0.01 | 0.00 | 0.90 | 0.90 | 0.89 | 0.73 | 0.61 | 0.52 | 0.27 | 0.23 |
| APP | 3991     | 4 | 0.73 | 0.86 | 0.69 | 1.00 | 1.00 | 0.86 | 0.60 | 0.59 | 0.52 | 0.38 | 0.02 | 0.02 | 0.69 | 0.82 | 0.93 | 0.73 | 0.86 | 0.93 |
| APP | 2830033  | 4 | 1.00 | 0.78 | 0.60 | 0.86 | 0.67 | 1.00 | 0.98 | 0.79 | 0.91 | 0.69 | 0.04 | 0.04 | 0.67 | 0.82 | 0.34 | 0.39 | 0.57 | 0.71 |
| APP | 2830036  | 4 | 0.07 | 0.08 | 0.01 | 0.01 | 0.00 | 0.01 | 0.13 | 0.19 | 0.04 | 0.07 | 0.40 | 0.46 | 1.00 | 0.73 | 0.67 | 0.32 | 0.71 | 0.93 |
| APP | 2830038  | 3 | 0.57 | 0.86 | 0.04 | 0.08 | 0.69 | 0.22 | 0.23 | 0.38 | 0.04 | 0.03 | 0.86 | 0.72 | 0.89 | 0.57 | 0.35 | 0.52 | 0.71 | 1.00 |
| APP | 7283136  | 2 | 0.67 | 0.57 | 1.00 | 1.00 | 0.86 | 0.35 | 0.67 | 0.74 | 0.33 | 0.06 | 0.28 | 0.26 | 1.00 | 0.67 | 0.93 | 1.00 | 0.93 | 0.32 |

|     |          |   |      |      |      |      |      |      |      |      |      |      |      |      |      |      |      |      |      |      |
|-----|----------|---|------|------|------|------|------|------|------|------|------|------|------|------|------|------|------|------|------|------|
| APP | 2830040  | 4 | 0.48 | 0.23 | 0.47 | 1.00 | 0.19 | 0.18 | 0.57 | 0.79 | 0.22 | 0.23 | 0.93 | 0.90 | 1.00 | 0.82 | 0.15 | 0.30 | 0.08 | 0.10 |
| APP | 731523   | 4 | 0.45 | 0.67 | 1.00 | 0.44 | 1.00 | 0.86 | 0.90 | 0.55 | 0.67 | 0.69 | 0.83 | 0.79 | 1.00 | 0.73 | 0.73 | 0.91 | 1.00 | 0.93 |
| APP | 2830044  | 2 | 0.86 | 0.40 | 0.20 | 0.17 | 0.36 | 0.34 | 0.34 | 0.38 | 0.10 | 0.17 | 0.10 | 0.04 | 1.00 | 0.91 | 0.80 | 0.73 | 0.61 | 0.71 |
| APP | 2830051  | 2 | 0.42 | 0.40 | 0.30 | 0.35 | 0.24 | 0.73 | 0.84 | 0.76 | 0.73 | 0.33 | 0.69 | 0.54 | 1.00 | 1.00 | 0.67 | 0.91 | 0.36 | 0.38 |
| APP | 2830052  | 2 | 0.69 | 0.18 | 0.11 | 0.15 | 0.52 | 1.00 | 0.87 | 0.86 | 0.73 | 1.00 | 0.12 | 0.16 | 0.54 | 0.65 | 0.38 | 0.27 | 0.35 | 0.40 |
| APP | 11702267 | 4 | 0.44 | 1.00 | 0.89 | 1.00 | 1.00 | 0.86 | 0.78 | 0.78 | 0.12 | 0.14 | 0.32 | 0.28 | 0.57 | 0.73 | 0.44 | 0.69 | 0.71 | 0.71 |
| APP | 2830054  | 3 | 0.69 | 0.57 | 0.48 | 0.78 | 1.00 | 0.78 | 0.74 | 0.85 | 0.48 | 0.67 | 0.55 | 0.38 | 0.48 | 0.40 | 0.28 | 0.19 | 0.93 | 0.86 |
| APP | 12482262 | 3 | 0.27 | 1.00 | 1.00 | 1.00 | 0.73 | 0.61 | 0.16 | 0.17 | 0.50 | 0.69 | 0.25 | 0.20 | 0.20 | 0.22 | 0.20 | 0.22 | 0.02 | 0.01 |
| APP | 2256331  | 3 | 0.54 | 0.86 | 0.61 | 0.78 | 0.57 | 0.50 | 0.55 | 0.63 | 0.40 | 0.52 | 0.62 | 0.74 | 0.65 | 0.40 | 0.50 | 0.39 | 0.47 | 0.37 |
| APP | 3827166  | 3 | 1.00 | 0.67 | 0.33 | 0.48 | 0.15 | 0.08 | 0.87 | 0.98 | 0.73 | 0.92 | 0.72 | 0.64 | 1.00 | 0.82 | 0.57 | 0.91 | 0.79 | 1.00 |
| APP | 2830058  | 2 | 1.00 | 0.67 | 0.33 | 0.48 | 0.15 | 0.08 | 0.87 | 0.98 | 0.73 | 0.92 | 0.72 | 0.64 | 1.00 | 0.82 | 0.57 | 0.91 | 0.79 | 1.00 |
| APP | 2830068  | 4 | 0.86 | 0.40 | 0.28 | 0.32 | 0.86 | 0.60 | 0.45 | 0.53 | 0.52 | 0.61 | 0.59 | 0.35 | 0.60 | 0.73 | 0.80 | 0.54 | 0.36 | 0.28 |
| APP | 2830076  | 4 | 0.86 | 0.35 | 0.31 | 0.40 | 0.52 | 0.86 | 0.76 | 0.86 | 0.50 | 0.52 | 0.79 | 0.72 | 0.73 | 1.00 | 0.67 | 0.54 | 0.79 | 0.48 |
| APP | 2830079  | 3 | 0.65 | 0.41 | 0.41 | 0.47 | 0.11 | 0.06 | 0.85 | 0.84 | 0.65 | 0.92 | 0.44 | 0.46 | 0.89 | 0.60 | 0.93 | 1.00 | 0.71 | 0.60 |
| APP | 466609   | 3 | 0.86 | 0.07 | 0.52 | 0.43 | 0.12 | 0.13 | 0.94 | 0.95 | 0.11 | 0.10 | 0.33 | 0.41 | 0.36 | 0.22 | 0.93 | 0.82 | 0.28 | 0.67 |
| APP | 12482753 | 3 | 0.32 | 0.69 | 0.89 | 0.86 | 0.57 | 0.86 | 0.44 | 0.53 | 0.82 | 1.00 | 0.35 | 0.32 | 0.10 | 0.07 | 0.18 | 0.18 | 0.05 | 0.06 |
| APP | 375369   | 1 | 0.61 | 0.67 | 0.78 | 0.61 | 0.60 | 0.44 | 0.84 | 0.93 | 0.36 | 0.65 | 0.90 | 0.79 | 0.69 | 0.57 | 0.50 | 0.50 | 0.93 | 0.79 |
| APP | 2830088  | 2 | 0.65 | 0.73 | 0.67 | 0.61 | 0.52 | 0.28 | 0.62 | 0.66 | 0.36 | 0.38 | 0.97 | 0.97 | 0.61 | 0.50 | 0.61 | 0.57 | 0.50 | 0.41 |
| APP | 17588612 | 2 | 0.86 | 0.86 | 0.47 | 0.24 | 0.45 | 0.19 | 0.99 | 0.90 | 0.16 | 0.07 | 0.83 | 0.85 | 0.28 | 0.28 | 0.24 | 0.13 | 0.86 | 0.71 |
| APP | 10460695 | 1 | 0.86 | 0.67 | 0.35 | 0.67 | 0.15 | 0.08 | 0.77 | 0.90 | 0.73 | 0.92 | 0.79 | 0.74 | 1.00 | 0.82 | 0.54 | 0.91 | 0.79 | 1.00 |
| APP | 2186302  | 2 | 0.86 | 0.40 | 0.36 | 0.39 | 0.78 | 0.86 | 0.53 | 0.50 | 0.44 | 0.32 | 0.76 | 0.51 | 0.73 | 0.73 | 0.67 | 0.52 | 0.42 | 0.32 |
| APP | 13049230 | 3 | 0.86 | 0.57 | 0.36 | 0.39 | 1.00 | 1.00 | 0.67 | 0.60 | 0.52 | 0.52 | 0.79 | 0.74 | 0.89 | 0.91 | 0.65 | 0.50 | 0.71 | 0.39 |
| APP | 370345   | 2 | 0.57 | 0.40 | 0.40 | 0.48 | 0.57 | 0.60 | 0.85 | 0.86 | 0.41 | 0.38 | 0.93 | 0.92 | 0.57 | 0.36 | 0.35 | 0.36 | 0.93 | 0.93 |
| APP | 6516727  | 3 | 0.65 | 0.50 | 0.40 | 0.40 | 0.86 | 0.78 | 0.70 | 0.61 | 0.37 | 0.32 | 0.83 | 0.64 | 0.48 | 0.37 | 0.44 | 0.38 | 0.71 | 0.43 |
| APP | 2830104  | 3 | 1.00 | 0.54 | 0.60 | 0.67 | 0.11 | 0.08 | 0.92 | 0.84 | 0.60 | 0.92 | 0.52 | 0.44 | 1.00 | 1.00 | 0.93 | 1.00 | 1.00 | 0.93 |
| APP | 462281   | 3 | 0.86 | 1.00 | 0.78 | 1.00 | 0.57 | 0.54 | 0.16 | 0.11 | 1.00 | 0.92 | 0.19 | 0.11 | 0.89 | 0.82 | 0.80 | 0.67 | 0.10 | 0.08 |
| APP | 466448   | 3 | 1.00 | 0.86 | 1.00 | 0.86 | 0.57 | 0.31 | 0.96 | 0.90 | 0.65 | 0.69 | 0.62 | 0.54 | 1.00 | 0.82 | 0.87 | 1.00 | 0.86 | 0.86 |
| APP | 438031   | 2 | 0.45 | 0.33 | 0.10 | 0.09 | 0.11 | 0.11 | 0.59 | 0.66 | 0.73 | 0.83 | 0.42 | 0.30 | 1.00 | 0.91 | 0.31 | 0.40 | 0.86 | 1.00 |
| APP | 2156079  | 1 | 0.54 | 0.21 | 0.37 | 0.41 | 0.86 | 1.00 | 0.96 | 0.90 | 0.69 | 1.00 | 0.72 | 0.62 | 0.73 | 0.57 | 0.37 | 0.40 | 0.18 | 0.17 |

**Table S3.** Linear Regression Analyses of Polymorphisms with Cognitive Phenotypes in APOE stratified LBC1936 dataset. Results shown are p values following adaptive permutation and were considered significant if  $p < 0.00056$ . The following abbreviations are used: GCA11, general cognitive ability at age 11 (MHT adjusted for age); GCA70, general cognitive ability at age 70 (MHT adjusted for age); LM, logical memory; MR, matrix reasoning; VF, verbal fluency.

| Gene       | dbSNP ID (rs)                | HAPLOTYPE | GCA11 | GCA 70 | VF    | MR    | LM    |
|------------|------------------------------|-----------|-------|--------|-------|-------|-------|
| <b>CR1</b> | 9429940 1571344 2025935      | 244       | 0.972 | 0.886  | 0.768 | 0.118 | 0.991 |
| <b>CR1</b> | 9429940 1571344 2025935      | 222       | 0.876 | 0.222  | 0.319 | 0.417 | 0.058 |
| <b>CR1</b> | 9429940 1571344 2025935      | 442       | 0.211 | 0.272  | 0.843 | 0.556 | 0.946 |
| <b>CR1</b> | 9429940 1571344 2025935      | 242       | 0.481 | 0.868  | 0.435 | 0.562 | 0.216 |
| <b>CR1</b> | 1571344 2025935 4310446      | 422       | 0.526 | 0.347  | 0.673 | 0.258 | 0.537 |
| <b>CR1</b> | 1571344 2025935 4310446      | 444       | 0.888 | 0.945  | 0.815 | 0.126 | 0.902 |
| <b>CR1</b> | 1571344 2025935 4310446      | 224       | 0.939 | 0.164  | 0.291 | 0.398 | 0.094 |
| <b>CR1</b> | 1571344 2025935 4310446      | 424       | 0.708 | 0.871  | 0.204 | 0.936 | 0.473 |
| <b>CR1</b> | 2025935 4310446 11117959     | 443       | 0.421 | 0.349  | 0.124 | 0.821 | 0.766 |
| <b>CR1</b> | 2025935 4310446 11117959     | 243       | 0.785 | 0.604  | 0.472 | 0.536 | 0.249 |
| <b>CR1</b> | 2025935 4310446 11117959     | 221       | 0.656 | 0.299  | 0.768 | 0.274 | 0.601 |
| <b>CR1</b> | 2025935 4310446 11117959     | 441       | 0.771 | 0.857  | 0.919 | 0.127 | 0.800 |
| <b>CR1</b> | 2025935 4310446 11117959     | 241       | 0.533 | 0.239  | 0.265 | 0.269 | 0.592 |
| <b>CR1</b> | 4310446 rs11117959 rs6656401 | 211       | 0.938 | 0.288  | 0.933 | 0.747 | 0.539 |
| <b>CR1</b> | 4310446 rs11117959 rs6656401 | 411       | 0.089 | 0.267  | 0.033 | 0.174 | 0.691 |
| <b>CR1</b> | 4310446 11117959 6656401     | 233       | 0.123 | 0.309  | 0.837 | 0.977 | 0.351 |
| <b>CR1</b> | 4310446 11117959 6656401     | 433       | 0.842 | 0.869  | 0.275 | 0.577 | 0.324 |
| <b>CR1</b> | 4310446 11117959 6656401     | 213       | 0.828 | 0.732  | 0.484 | 0.106 | 0.628 |
| <b>CR1</b> | 4310446 11117959 6656401     | 413       | 0.387 | 0.165  | 0.778 | 0.894 | 0.662 |
| <b>CR1</b> | 11117959 6656401 10127904    | 133       | 0.703 | 0.926  | 0.821 | 0.745 | 0.415 |
| <b>CR1</b> | 11117959 6656401 10127904    | 114       | 0.364 | 0.108  | 0.218 | 0.595 | 0.870 |
| <b>CR1</b> | 11117959 6656401 10127904    | 334       | 0.853 | 0.734  | 0.264 | 0.575 | 0.269 |
| <b>CR1</b> | 11117959 6656401 10127904    | 134       | 0.222 | 0.143  | 0.804 | 0.253 | 0.153 |
| <b>CR1</b> | 6656401 10127904 650877      | 343       | 0.745 | 0.858  | 0.199 | 0.832 | 0.454 |
| <b>CR1</b> | 6656401 10127904 650877      | 331       | 0.695 | 0.940  | 0.882 | 0.757 | 0.440 |
| <b>CR1</b> | 6656401 10127904 650877      | 141       | 0.357 | 0.103  | 0.185 | 0.610 | 0.831 |
| <b>CR1</b> | 6656401 10127904 650877      | 341       | 0.417 | 0.292  | 0.765 | 0.402 | 0.277 |
| <b>CR1</b> | 10127904 650877 3818361      | 414       | 0.095 | 0.041  | 0.166 | 0.339 | 0.810 |
| <b>CR1</b> | 10127904 650877 3818361      | 432       | 0.745 | 0.858  | 0.199 | 0.832 | 0.454 |
| <b>CR1</b> | 10127904 650877 3818361      | 312       | 0.708 | 0.922  | 0.750 | 0.783 | 0.498 |
| <b>CR1</b> | 10127904 650877 3818361      | 412       | 0.130 | 0.136  | 0.850 | 0.209 | 0.136 |
| <b>PS2</b> | 1150895 2073489 1295640      | 222       | 0.587 | 0.461  | 0.339 | 0.818 | 0.296 |
| <b>PS2</b> | 1150895 2073489 1295640      | 422       | 0.755 | 0.349  | 0.152 | 0.789 | 0.871 |
| <b>PS2</b> | 1150895 2073489 1295640      | 444       | 0.230 | 0.311  | 0.538 | 0.576 | 0.610 |
| <b>PS2</b> | 1150895 2073489 1295640      | 424       | 0.475 | 0.562  | 0.063 | 0.318 | 0.398 |
| <b>PS2</b> | 2073489 1295640 2802268      | 443       | 0.214 | 0.140  | 0.734 | 0.262 | 0.950 |
| <b>PS2</b> | 2073489 1295640 2802268      | 224       | 0.482 | 0.155  | 0.605 | 0.954 | 0.330 |
| <b>PS2</b> | 2073489 1295640 2802268      | 444       | 0.824 | 0.869  | 0.228 | 0.687 | 0.622 |
| <b>PS2</b> | 2073489 1295640 2802268      | 244       | 0.475 | 0.562  | 0.063 | 0.318 | 0.398 |
| <b>PS2</b> | 1295640 2802268 16846644     | 244       | 0.581 | 0.385  | 0.242 | 0.816 | 0.964 |
| <b>PS2</b> | 1295640 2802268 16846644     | 433       | 0.214 | 0.140  | 0.734 | 0.262 | 0.950 |
| <b>PS2</b> | 1295640 2802268 16846644     | 243       | 0.788 | 0.426  | 0.539 | 0.859 | 0.220 |

|             |                             |     |       |       |       |       |       |
|-------------|-----------------------------|-----|-------|-------|-------|-------|-------|
| <b>PS2</b>  | 1295640 2802268 16846644    | 443 | 0.762 | 0.792 | 0.789 | 0.301 | 0.315 |
| <b>PS2</b>  | 2802268 16846644 12126925   | 331 | 0.892 | 0.296 | 0.947 | 0.553 | 0.909 |
| <b>PS2</b>  | 2802268 16846644 12126925   | 431 | 0.990 | 0.694 | 0.589 | 0.415 | 0.968 |
| <b>PS2</b>  | 2802268 16846644 12126925   | 443 | 0.546 | 0.333 | 0.185 | 0.798 | 0.928 |
| <b>PS2</b>  | 2802268 16846644 12126925   | 333 | 0.202 | 0.197 | 0.707 | 0.179 | 0.924 |
| <b>PS2</b>  | 2802268 16846644 12126925   | 433 | 0.584 | 0.888 | 0.223 | 0.073 | 0.948 |
| <b>BIN1</b> | 4662703 880436 3768857      | 341 | 0.563 | 0.945 | 0.147 | 0.607 | 0.838 |
| <b>BIN1</b> | 4662703 880436 3768857      | 343 | 0.104 | 0.105 | 0.078 | 0.425 | 0.842 |
| <b>BIN1</b> | 4662703 880436 3768857      | 123 | 0.363 | 0.181 | 0.710 | 0.894 | 0.645 |
| <b>BIN1</b> | 880436 3768857 17014873     | 232 | 0.047 | 0.029 | 0.087 | 0.289 | 0.120 |
| <b>BIN1</b> | 880436 3768857 17014873     | 411 | 0.610 | 0.865 | 0.169 | 0.609 | 0.871 |
| <b>BIN1</b> | 880436 3768857 17014873     | 431 | 0.104 | 0.118 | 0.088 | 0.400 | 0.938 |
| <b>BIN1</b> | 880436 3768857 17014873     | 231 | 0.820 | 0.917 | 0.526 | 0.665 | 0.593 |
| <b>BIN1</b> | 3768857 17014873 2276575    | 323 | 0.028 | 0.031 | 0.051 | 0.112 | 0.086 |
| <b>BIN1</b> | 3768857 17014873 2276575 *  | 313 | 0.000 | 0.057 | 0.002 | 0.085 | 0.038 |
| <b>BIN1</b> | 3768857 17014873 2276575    | 321 | 0.364 | 0.226 | 0.546 | 0.919 | 0.617 |
| <b>BIN1</b> | 3768857 17014873 2276575    | 111 | 0.469 | 0.997 | 0.184 | 0.442 | 0.781 |
| <b>BIN1</b> | 3768857 17014873 2276575    | 311 | 0.341 | 0.831 | 0.801 | 0.931 | 0.362 |
| <b>BIN1</b> | 17014873 2276575 13430599   | 234 | 0.036 | 0.036 | 0.060 | 0.114 | 0.076 |
| <b>BIN1</b> | 17014873 2276575 13430599 * | 134 | 0.000 | 0.057 | 0.002 | 0.075 | 0.039 |
| <b>BIN1</b> | 17014873 2276575 13430599   | 213 | 0.339 | 0.202 | 0.475 | 0.867 | 0.560 |
| <b>BIN1</b> | 17014873 2276575 13430599   | 113 | 0.070 | 0.818 | 0.130 | 0.421 | 0.431 |
| <b>BIN1</b> | 2276575 13430599 10194375   | 341 | 0.016 | 0.358 | 0.038 | 0.325 | 0.225 |
| <b>BIN1</b> | 2276575 13430599 10194375   | 131 | 0.942 | 0.774 | 0.990 | 0.091 | 0.510 |
| <b>BIN1</b> | 2276575 13430599 10194375   | 132 | 0.068 | 0.369 | 0.125 | 0.036 | 0.159 |
| <b>BIN1</b> | 13430599 10194375 13426725  | 412 | 0.019 | 0.333 | 0.030 | 0.315 | 0.189 |
| <b>BIN1</b> | 13430599 10194375 13426725  | 314 | 0.991 | 0.753 | 0.924 | 0.078 | 0.425 |
| <b>BIN1</b> | 13430599 10194375 13426725  | 324 | 0.068 | 0.371 | 0.126 | 0.036 | 0.162 |
| <b>BIN1</b> | 10194375 13426725 10200967  | 242 | 0.165 | 0.253 | 0.581 | 0.013 | 0.656 |
| <b>BIN1</b> | 10194375 13426725 10200967  | 124 | 0.021 | 0.327 | 0.021 | 0.343 | 0.234 |
| <b>BIN1</b> | 10194375 13426725 10200967  | 144 | 0.956 | 0.781 | 0.863 | 0.080 | 0.472 |
| <b>BIN1</b> | 10194375 13426725 10200967  | 244 | 0.574 | 0.939 | 0.286 | 0.913 | 0.305 |
| <b>BIN1</b> | 13426725 10200967 17014923  | 444 | 0.297 | 0.666 | 0.412 | 0.364 | 0.062 |
| <b>BIN1</b> | 13426725 10200967 17014923  | 422 | 0.155 | 0.233 | 0.527 | 0.012 | 0.655 |
| <b>BIN1</b> | 13426725 10200967 17014923  | 242 | 0.025 | 0.364 | 0.028 | 0.351 | 0.269 |
| <b>BIN1</b> | 13426725 10200967 17014923  | 442 | 0.734 | 0.493 | 0.643 | 0.029 | 0.319 |
| <b>BIN1</b> | 10200967 17014923 6709337   | 221 | 0.158 | 0.254 | 0.516 | 0.013 | 0.553 |
| <b>BIN1</b> | 10200967 17014923 6709337   | 421 | 0.036 | 0.405 | 0.064 | 0.490 | 0.236 |
| <b>BIN1</b> | 10200967 17014923 6709337   | 442 | 0.297 | 0.666 | 0.412 | 0.364 | 0.062 |
| <b>BIN1</b> | 10200967 17014923 6709337 * | 422 | 0.643 | 0.455 | 0.841 | 0.019 | 0.336 |
| <b>BIN1</b> | 17014923 6709337 11678252   | 423 | 0.292 | 0.723 | 0.444 | 0.314 | 0.059 |
| <b>BIN1</b> | 17014923 6709337 11678252   | 223 | 0.902 | 0.612 | 0.920 | 0.012 | 0.384 |
| <b>BIN1</b> | 17014923 6709337 11678252   | 211 | 0.623 | 0.775 | 0.376 | 0.150 | 0.685 |
| <b>BIN1</b> | 17014923 6709337 11678252   | 221 | 0.456 | 0.748 | 0.746 | 0.802 | 0.687 |
| <b>BIN1</b> | 6709337 11678252 873270     | 213 | 0.399 | 0.808 | 0.771 | 0.704 | 0.658 |

|               |                            |     |       |       |       |       |       |
|---------------|----------------------------|-----|-------|-------|-------|-------|-------|
| <b>BIN1</b>   | 6709337 11678252 873270    | 231 | 0.362 | 0.848 | 0.637 | 0.148 | 0.488 |
| <b>BIN1</b>   | 6709337 11678252 873270    | 111 | 0.623 | 0.775 | 0.376 | 0.150 | 0.685 |
| <b>BIN1</b>   | 11678252 873270 749008     | 132 | 0.399 | 0.808 | 0.771 | 0.704 | 0.658 |
| <b>BIN1</b>   | 11678252 873270 749008     | 312 | 0.571 | 0.822 | 0.561 | 0.786 | 0.068 |
| <b>BIN1</b>   | 11678252 873270 749008     | 314 | 0.504 | 0.706 | 0.960 | 0.080 | 0.376 |
| <b>BIN1</b>   | 11678252 873270 749008     | 114 | 0.706 | 0.763 | 0.442 | 0.127 | 0.716 |
| <b>BIN1</b>   | 873270 749008 6743470      | 124 | 0.523 | 0.804 | 0.549 | 0.816 | 0.058 |
| <b>BIN1</b>   | 873270 749008 6743470      | 144 | 0.877 | 0.557 | 0.783 | 0.091 | 0.461 |
| <b>BIN1</b>   | 873270 749008 6743470      | 323 | 0.393 | 0.808 | 0.704 | 0.773 | 0.685 |
| <b>BIN1</b>   | 873270 749008 6743470      | 143 | 0.821 | 0.923 | 0.431 | 0.714 | 0.325 |
| <b>BIN1</b>   | 749008 6743470 4663098     | 434 | 0.646 | 0.649 | 0.846 | 0.049 | 0.601 |
| <b>BIN1</b>   | 749008 6743470 4663098     | 242 | 0.521 | 0.812 | 0.631 | 0.906 | 0.065 |
| <b>BIN1</b>   | 749008 6743470 4663098     | 442 | 0.929 | 0.454 | 0.779 | 0.131 | 0.615 |
| <b>BIN1</b>   | 749008 6743470 4663098     | 232 | 0.374 | 0.865 | 0.613 | 0.922 | 0.697 |
| <b>BIN1</b>   | 749008 6743470 4663098     | 432 | 0.864 | 0.794 | 0.340 | 0.181 | 0.138 |
| <b>BIN1</b>   | 6743470 4663098 744373     | 322 | 0.893 | 0.785 | 0.987 | 0.110 | 0.361 |
| <b>BIN1</b>   | 6743470 4663098 744373     | 344 | 0.664 | 0.755 | 0.993 | 0.122 | 0.658 |
| <b>BIN1</b>   | 6743470 4663098 744373     | 424 | 0.536 | 0.915 | 0.559 | 0.862 | 0.080 |
| <b>BIN1</b>   | 6743470 4663098 744373     | 324 | 0.275 | 0.832 | 0.521 | 0.955 | 0.255 |
| <b>CLU</b>    | 7012010 10101779 10503814  | 224 | 0.665 | 0.390 | 0.827 | 0.970 | 0.822 |
| <b>CLU</b>    | 7012010 10101779 10503814  | 222 | 0.224 | 0.190 | 0.237 | 0.161 | 0.969 |
| <b>CLU</b>    | 7012010 10101779 10503814  | 242 | 0.276 | 0.825 | 0.285 | 0.904 | 0.501 |
| <b>CLU</b>    | 7012010 10101779 10503814  | 442 | 0.212 | 0.438 | 0.158 | 0.163 | 0.778 |
| <b>CLU</b>    | 10101779 10503814 11136000 | 424 | 0.512 | 0.775 | 0.094 | 0.790 | 0.546 |
| <b>CLU</b>    | 10101779 10503814 11136000 | 242 | 0.576 | 0.329 | 0.775 | 0.917 | 0.893 |
| <b>CLU</b>    | 10101779 10503814 11136000 | 222 | 0.244 | 0.187 | 0.240 | 0.165 | 0.924 |
| <b>CLU</b>    | 10101779 10503814 11136000 | 422 | 0.847 | 0.697 | 0.473 | 0.301 | 0.469 |
| <b>CLU</b>    | 10503814 11136000 9314349  | 243 | 0.240 | 0.811 | 0.009 | 0.459 | 0.036 |
| <b>CLU</b>    | 10503814 11136000 9314349  | 423 | 0.319 | 0.097 | 0.555 | 0.967 | 0.990 |
| <b>CLU</b>    | 10503814 11136000 9314349  | 223 | 0.448 | 0.759 | 0.492 | 0.447 | 0.471 |
| <b>CLU</b>    | 10503814 11136000 9314349  | 241 | 0.974 | 0.622 | 0.763 | 0.892 | 0.619 |
| <b>CLU</b>    | 10503814 11136000 9314349  | 221 | 0.114 | 0.258 | 0.193 | 0.361 | 0.140 |
| <b>CLU</b>    | 11136000 9314349 492638    | 434 | 0.631 | 0.249 | 0.003 | 0.387 | 0.282 |
| <b>CLU</b>    | 11136000 9314349 492638    | 414 | 0.806 | 0.793 | 0.316 | 0.604 | 0.467 |
| <b>CLU</b>    | 11136000 9314349 492638    | 214 | 0.977 | 0.671 | 0.742 | 0.454 | 0.047 |
| <b>CLU</b>    | 11136000 9314349 492638    | 433 | 0.069 | 0.409 | 0.197 | 0.684 | 0.127 |
| <b>CLU</b>    | 11136000 9314349 492638    | 233 | 0.458 | 0.555 | 0.418 | 0.507 | 0.287 |
| <b>CLU</b>    | 11136000 9314349 492638    | 413 | 0.363 | 0.540 | 0.500 | 0.331 | 0.500 |
| <b>CLU</b>    | 11136000 9314349 492638    | 213 | 0.118 | 0.271 | 0.128 | 0.158 | 0.453 |
| <b>PICALM</b> | 10898425 618679 2077815    | 443 | 0.837 | 0.730 | 0.750 | 0.924 | 0.834 |
| <b>PICALM</b> | 10898425 618679 2077815    | 243 | 0.681 | 0.825 | 0.949 | 0.305 | 0.393 |
| <b>PICALM</b> | 10898425 618679 2077815    | 431 | 0.174 | 0.991 | 0.862 | 0.801 | 0.741 |
| <b>PICALM</b> | 10898425 618679 2077815    | 231 | 0.214 | 0.946 | 0.698 | 0.287 | 0.360 |
| <b>PICALM</b> | 618679 2077815 10898427    | 313 | 0.372 | 0.728 | 0.727 | 0.021 | 0.987 |
| <b>PICALM</b> | 618679 2077815 10898427    | 431 | 0.794 | 0.970 | 0.845 | 0.356 | 0.523 |

|               |                           |     |       |       |       |       |       |
|---------------|---------------------------|-----|-------|-------|-------|-------|-------|
| <i>PICALM</i> | 618679 2077815 10898427   | 311 | 0.550 | 0.814 | 0.931 | 0.257 | 0.568 |
| <i>PICALM</i> | 2077815 10898427 11234495 | 134 | 0.370 | 0.728 | 0.705 | 0.021 | 0.986 |
| <i>PICALM</i> | 2077815 10898427 11234495 | 114 | 0.552 | 0.416 | 0.366 | 0.809 | 0.322 |
| <i>PICALM</i> | 2077815 10898427 11234495 | 312 | 0.852 | 0.945 | 0.793 | 0.317 | 0.474 |
| <i>PICALM</i> | 2077815 10898427 11234495 | 112 | 0.405 | 0.575 | 0.803 | 0.300 | 0.864 |
| <i>PICALM</i> | 10898427 11234495 510566  | 121 | 0.937 | 0.868 | 0.841 | 0.534 | 0.557 |
| <i>PICALM</i> | 10898427 11234495 510566  | 342 | 0.373 | 0.729 | 0.735 | 0.022 | 0.987 |
| <i>PICALM</i> | 10898427 11234495 510566  | 142 | 0.554 | 0.417 | 0.359 | 0.804 | 0.323 |
| <i>PICALM</i> | 10898427 11234495 510566  | 122 | 0.310 | 0.645 | 0.802 | 0.216 | 0.911 |
| <i>PICALM</i> | 11234495 510566 10501602  | 223 | 0.740 | 0.090 | 0.725 | 0.807 | 0.185 |
| <i>PICALM</i> | 11234495 510566 10501602  | 211 | 0.949 | 0.838 | 0.822 | 0.531 | 0.565 |
| <i>PICALM</i> | 11234495 510566 10501602  | 421 | 0.265 | 0.485 | 0.956 | 0.039 | 0.664 |
| <i>PICALM</i> | 11234495 510566 10501602  | 221 | 0.197 | 0.512 | 0.634 | 0.256 | 0.314 |
| <i>PICALM</i> | 510566 10501602 10501604  | 211 | 0.664 | 0.590 | 0.529 | 0.008 | 0.395 |
| <i>PICALM</i> | 510566 10501602 10501604  | 233 | 0.723 | 0.099 | 0.727 | 0.801 | 0.181 |
| <i>PICALM</i> | 510566 10501602 10501604  | 113 | 0.938 | 0.866 | 0.828 | 0.529 | 0.557 |
| <i>PICALM</i> | 510566 10501602 10501604  | 213 | 0.523 | 0.422 | 0.936 | 0.162 | 0.476 |
| <i>PICALM</i> | 10501602 10501604 713346  | 112 | 0.657 | 0.725 | 0.546 | 0.005 | 0.401 |
| <i>PICALM</i> | 10501602 10501604 713346  | 132 | 0.468 | 0.538 | 0.873 | 0.123 | 0.670 |
| <i>PICALM</i> | 10501602 10501604 713346  | 331 | 0.745 | 0.090 | 0.726 | 0.827 | 0.179 |
| <i>PICALM</i> | 10501602 10501604 713346  | 131 | 0.312 | 0.732 | 0.714 | 0.238 | 0.649 |
| <i>PICALM</i> | 10501604 713346 475639    | 122 | 0.657 | 0.725 | 0.546 | 0.005 | 0.401 |
| <i>PICALM</i> | 10501604 713346 475639    | 322 | 0.450 | 0.517 | 0.875 | 0.118 | 0.674 |
| <i>PICALM</i> | 10501604 713346 475639    | 312 | 0.635 | 0.622 | 0.278 | 0.821 | 0.647 |
| <i>PICALM</i> | 10501604 713346 475639    | 314 | 0.258 | 0.723 | 0.738 | 0.293 | 0.953 |
| <i>PICALM</i> | 713346 475639 669336      | 121 | 0.856 | 0.395 | 0.500 | 0.947 | 0.458 |
| <i>PICALM</i> | 713346 475639 669336      | 223 | 0.386 | 0.487 | 0.534 | 0.133 | 0.635 |
| <i>PICALM</i> | 713346 475639 669336      | 123 | 0.535 | 0.312 | 0.393 | 0.480 | 0.585 |
| <i>PICALM</i> | 713346 475639 669336      | 143 | 0.258 | 0.723 | 0.738 | 0.293 | 0.953 |
| <i>PICALM</i> | 475639 669336 7938033     | 212 | 0.901 | 0.073 | 0.064 | 0.641 | 0.155 |
| <i>PICALM</i> | 475639 669336 7938033     | 232 | 0.234 | 0.290 | 0.892 | 0.280 | 0.466 |
| <i>PICALM</i> | 475639 669336 7938033     | 432 | 0.359 | 0.024 | 0.481 | 0.192 | 0.141 |
| <i>PICALM</i> | 475639 669336 7938033     | 211 | 0.785 | 0.978 | 0.841 | 0.866 | 0.919 |
| <i>PICALM</i> | 475639 669336 7938033     | 431 | 0.068 | 0.257 | 0.406 | 0.810 | 0.354 |
| <i>PICALM</i> | 669336 7938033 10792820   | 322 | 0.336 | 0.405 | 0.579 | 0.174 | 0.561 |
| <i>PICALM</i> | 669336 7938033 10792820   | 121 | 0.933 | 0.096 | 0.085 | 0.582 | 0.213 |
| <i>PICALM</i> | 669336 7938033 10792820   | 321 | 0.282 | 0.083 | 0.277 | 0.141 | 0.228 |
| <i>PICALM</i> | 669336 7938033 10792820   | 111 | 0.717 | 0.837 | 0.967 | 0.849 | 0.850 |
| <i>PICALM</i> | 669336 7938033 10792820   | 311 | 0.065 | 0.212 | 0.390 | 0.821 | 0.316 |
| <i>PICALM</i> | 7938033 10792820 527162   | 112 | 0.796 | 0.770 | 0.913 | 0.804 | 0.658 |
| <i>PICALM</i> | 7938033 10792820 527162   | 224 | 0.336 | 0.405 | 0.579 | 0.174 | 0.561 |
| <i>PICALM</i> | 7938033 10792820 527162   | 214 | 0.344 | 0.039 | 0.112 | 0.613 | 0.176 |
| <i>PICALM</i> | 7938033 10792820 527162   | 114 | 0.168 | 0.379 | 0.414 | 0.860 | 0.228 |
| <i>PICALM</i> | 10792820 527162 680119    | 124 | 0.843 | 0.793 | 0.877 | 0.816 | 0.631 |
| <i>PICALM</i> | 10792820 527162 680119    | 144 | 0.074 | 0.143 | 0.471 | 0.708 | 0.154 |

|        |                          |     |       |       |       |       |       |
|--------|--------------------------|-----|-------|-------|-------|-------|-------|
| PICALM | 10792820 527162 680119   | 242 | 0.382 | 0.367 | 0.531 | 0.162 | 0.580 |
| PICALM | 10792820 527162 680119   | 142 | 0.379 | 0.041 | 0.275 | 0.781 | 0.270 |
| PICALM | 527162 680119 10792821   | 422 | 0.374 | 0.722 | 0.692 | 0.028 | 0.980 |
| PICALM | 527162 680119 10792821   | 244 | 0.850 | 0.803 | 0.885 | 0.813 | 0.628 |
| PICALM | 527162 680119 10792821   | 444 | 0.073 | 0.140 | 0.465 | 0.711 | 0.153 |
| PICALM | 527162 680119 10792821   | 424 | 0.366 | 0.134 | 0.397 | 0.387 | 0.570 |
| PICALM | 680119 10792821 642949   | 222 | 0.369 | 0.725 | 0.694 | 0.029 | 0.976 |
| PICALM | 680119 10792821 642949   | 242 | 0.361 | 0.312 | 0.270 | 0.102 | 0.462 |
| PICALM | 680119 10792821 642949   | 444 | 0.103 | 0.157 | 0.472 | 0.622 | 0.421 |
| PICALM | 680119 10792821 642949   | 244 | 0.856 | 0.306 | 0.812 | 0.886 | 0.809 |
| PICALM | 10792821 642949 666682   | 222 | 0.369 | 0.725 | 0.694 | 0.029 | 0.976 |
| PICALM | 10792821 642949 666682   | 422 | 0.379 | 0.336 | 0.258 | 0.101 | 0.407 |
| PICALM | 10792821 642949 666682   | 442 | 0.778 | 0.306 | 0.876 | 0.914 | 0.276 |
| PICALM | 10792821 642949 666682   | 444 | 0.242 | 0.789 | 0.726 | 0.504 | 0.860 |
| PICALM | 642949 666682 664629     | 223 | 0.104 | 0.202 | 0.178 | 0.106 | 0.069 |
| PICALM | 642949 666682 664629     | 423 | 0.608 | 0.598 | 0.562 | 0.825 | 0.911 |
| PICALM | 642949 666682 664629     | 443 | 0.620 | 0.093 | 0.641 | 0.580 | 0.215 |
| PICALM | 642949 666682 664629     | 221 | 0.773 | 0.492 | 0.521 | 0.015 | 0.351 |
| PICALM | 642949 666682 664629     | 421 | 0.868 | 0.258 | 0.628 | 0.921 | 0.075 |
| PICALM | 642949 666682 664629     | 441 | 0.339 | 0.424 | 0.491 | 0.711 | 0.537 |
| PICALM | 666682 664629 17745273   | 413 | 0.130 | 0.256 | 0.499 | 0.936 | 0.137 |
| PICALM | 666682 664629 17745273   | 231 | 0.315 | 0.539 | 0.332 | 0.206 | 0.207 |
| PICALM | 666682 664629 17745273   | 431 | 0.719 | 0.073 | 0.841 | 0.609 | 0.202 |
| PICALM | 666682 664629 17745273   | 211 | 0.664 | 0.317 | 0.591 | 0.033 | 0.138 |
| PICALM | 666682 664629 17745273   | 411 | 0.730 | 0.918 | 0.941 | 0.589 | 0.472 |
| PICALM | 664629 17745273 1941375  | 313 | 0.630 | 0.671 | 0.474 | 0.330 | 0.292 |
| PICALM | 664629 17745273 1941375  | 131 | 0.128 | 0.253 | 0.496 | 0.937 | 0.137 |
| PICALM | 664629 17745273 1941375  | 311 | 0.767 | 0.065 | 0.656 | 0.408 | 0.156 |
| PICALM | 664629 17745273 1941375  | 111 | 0.658 | 0.431 | 0.735 | 0.128 | 0.405 |
| PICALM | 17745273 1941375 677909  | 113 | 0.965 | 0.219 | 0.895 | 0.426 | 0.174 |
| PICALM | 17745273 1941375 677909  | 131 | 0.506 | 0.633 | 0.477 | 0.255 | 0.248 |
| PICALM | 17745273 1941375 677909  | 311 | 0.130 | 0.256 | 0.499 | 0.936 | 0.137 |
| PICALM | 17745273 1941375 677909  | 111 | 0.478 | 0.416 | 0.827 | 0.044 | 0.180 |
| PICALM | 1941375 677909 11234532  | 111 | 0.220 | 0.795 | 0.480 | 0.058 | 0.483 |
| PICALM | 1941375 677909 11234532  | 133 | 0.964 | 0.227 | 0.932 | 0.422 | 0.182 |
| PICALM | 1941375 677909 11234532  | 313 | 0.502 | 0.611 | 0.492 | 0.257 | 0.234 |
| PICALM | 1941375 677909 11234532  | 113 | 0.125 | 0.133 | 0.805 | 0.571 | 0.050 |
| PICALM | 677909 11234532 10501608 | 111 | 0.220 | 0.795 | 0.480 | 0.058 | 0.483 |
| PICALM | 677909 11234532 10501608 | 131 | 0.325 | 0.583 | 0.940 | 0.118 | 0.667 |
| PICALM | 677909 11234532 10501608 | 333 | 0.957 | 0.224 | 0.926 | 0.418 | 0.180 |
| PICALM | 677909 11234532 10501608 | 133 | 0.726 | 0.494 | 0.690 | 0.224 | 0.565 |
| PICALM | 11234532 10501608 669556 | 333 | 0.720 | 0.959 | 0.984 | 0.449 | 0.632 |
| PICALM | 11234532 10501608 669556 | 111 | 0.220 | 0.795 | 0.480 | 0.058 | 0.483 |
| PICALM | 11234532 10501608 669556 | 311 | 0.325 | 0.583 | 0.940 | 0.118 | 0.667 |
| PICALM | 11234532 10501608 669556 | 331 | 0.969 | 0.622 | 0.600 | 0.141 | 0.751 |

|               |                           |     |       |       |       |       |       |
|---------------|---------------------------|-----|-------|-------|-------|-------|-------|
| <b>PICALM</b> | 10501608 669556 621942    | 314 | 0.829 | 0.728 | 0.621 | 0.160 | 0.797 |
| <b>PICALM</b> | 10501608 669556 621942    | 333 | 0.720 | 0.959 | 0.984 | 0.449 | 0.632 |
| <b>PICALM</b> | 10501608 669556 621942    | 113 | 0.690 | 0.569 | 0.522 | 0.010 | 0.387 |
| <b>PICALM</b> | 10501608 669556 621942    | 313 | 0.824 | 0.854 | 0.927 | 0.811 | 0.929 |
| <b>PICALM</b> | 669556 621942 536841      | 332 | 0.720 | 0.959 | 0.984 | 0.449 | 0.632 |
| <b>PICALM</b> | 669556 621942 536841      | 132 | 0.519 | 0.052 | 0.656 | 0.998 | 0.125 |
| <b>PICALM</b> | 669556 621942 536841      | 144 | 0.829 | 0.730 | 0.621 | 0.161 | 0.799 |
| <b>PICALM</b> | 669556 621942 536841      | 134 | 0.743 | 0.137 | 0.494 | 0.082 | 0.120 |
| <b>PICALM</b> | 621942 536841 541458      | 322 | 0.876 | 0.193 | 0.777 | 0.541 | 0.144 |
| <b>PICALM</b> | 621942 536841 541458      | 444 | 0.829 | 0.730 | 0.621 | 0.161 | 0.799 |
| <b>PICALM</b> | 621942 536841 541458      | 344 | 0.744 | 0.137 | 0.499 | 0.082 | 0.118 |
| <b>PICALM</b> | 536841 541458 3851179     | 221 | 0.914 | 0.133 | 0.479 | 0.347 | 0.143 |
| <b>PICALM</b> | 536841 541458 3851179     | 441 | 0.374 | 0.604 | 0.631 | 0.187 | 0.298 |
| <b>PICALM</b> | 536841 541458 3851179     | 223 | 0.861 | 0.542 | 0.138 | 0.267 | 0.938 |
| <b>PICALM</b> | 536841 541458 3851179     | 443 | 0.518 | 0.129 | 0.999 | 0.871 | 0.426 |
| <b>PS1</b>    | 362412 214273 8006497     | 223 | 0.171 | 0.478 | 0.599 | 0.366 | 0.328 |
| <b>PS1</b>    | 362412 214273 8006497     | 241 | 0.680 | 0.813 | 0.464 | 0.941 | 0.715 |
| <b>PS1</b>    | 362412 214273 8006497     | 421 | 0.623 | 0.544 | 0.667 | 0.775 | 0.694 |
| <b>PS1</b>    | 362412 214273 8006497     | 221 | 0.537 | 0.692 | 0.401 | 0.475 | 0.717 |
| <b>PS1</b>    | 214273 8006497 362350     | 213 | 0.952 | 0.246 | 0.719 | 0.629 | 0.269 |
| <b>PS1</b>    | 214273 8006497 362350     | 231 | 0.171 | 0.478 | 0.599 | 0.366 | 0.328 |
| <b>PS1</b>    | 214273 8006497 362350     | 411 | 0.684 | 0.791 | 0.436 | 0.901 | 0.723 |
| <b>PS1</b>    | 214273 8006497 362350     | 211 | 0.341 | 0.463 | 0.750 | 0.823 | 0.461 |
| <b>PS1</b>    | 8006497 362350 214260     | 131 | 0.852 | 0.297 | 0.842 | 0.642 | 0.245 |
| <b>PS1</b>    | 8006497 362350 214260     | 111 | 0.369 | 0.670 | 0.473 | 0.826 | 0.975 |
| <b>PS1</b>    | 8006497 362350 214260     | 313 | 0.171 | 0.478 | 0.599 | 0.366 | 0.328 |
| <b>PS1</b>    | 8006497 362350 214260     | 113 | 0.993 | 0.418 | 0.997 | 0.968 | 0.236 |
| <b>PS1</b>    | 362350 214260 165933      | 134 | 0.980 | 0.917 | 0.538 | 0.842 | 0.549 |
| <b>PS1</b>    | 362350 214260 165933      | 312 | 0.852 | 0.297 | 0.842 | 0.642 | 0.245 |
| <b>PS1</b>    | 362350 214260 165933      | 112 | 0.369 | 0.670 | 0.473 | 0.826 | 0.975 |
| <b>PS1</b>    | 362350 214260 165933      | 132 | 0.559 | 0.733 | 0.479 | 0.782 | 0.854 |
| <b>PS1</b>    | 214260 165933 362377      | 121 | 0.288 | 0.759 | 0.519 | 0.934 | 0.900 |
| <b>PS1</b>    | 214260 165933 362377      | 343 | 0.965 | 0.931 | 0.555 | 0.845 | 0.547 |
| <b>PS1</b>    | 214260 165933 362377      | 123 | 0.972 | 0.375 | 0.913 | 0.550 | 0.329 |
| <b>PS1</b>    | 214260 165933 362377      | 323 | 0.517 | 0.778 | 0.431 | 0.788 | 0.830 |
| <b>PS1</b>    | 165933 362377 165935      | 233 | 0.268 | 0.871 | 0.570 | 0.490 | 0.962 |
| <b>PS1</b>    | 165933 362377 165935      | 211 | 0.288 | 0.759 | 0.519 | 0.934 | 0.900 |
| <b>PS1</b>    | 165933 362377 165935      | 431 | 0.899 | 0.818 | 0.485 | 0.948 | 0.590 |
| <b>PS1</b>    | 165933 362377 165935      | 231 | 0.609 | 0.657 | 0.133 | 0.404 | 0.721 |
| <b>PS1</b>    | 362377 165935 362346      | 111 | 0.288 | 0.759 | 0.519 | 0.934 | 0.900 |
| <b>PS1</b>    | 362377 165935 362346      | 333 | 0.217 | 0.954 | 0.623 | 0.434 | 0.998 |
| <b>PS1</b>    | 362377 165935 362346      | 313 | 0.569 | 0.807 | 0.382 | 0.471 | 0.942 |
| <b>chr 19</b> | 7247764 28555639 12460041 | 242 | 0.127 | 0.103 | 0.849 | 0.081 | 0.361 |
| <b>chr 19</b> | 7247764 28555639 12460041 | 414 | 0.535 | 0.284 | 0.660 | 0.152 | 0.967 |
| <b>chr 19</b> | 7247764 28555639 12460041 | 244 | 0.054 | 0.178 | 0.072 | 0.015 | 0.506 |

|        |                           |     |       |       |       |       |       |
|--------|---------------------------|-----|-------|-------|-------|-------|-------|
| chr 19 | 7247764 28555639 12460041 | 444 | 0.120 | 0.346 | 0.128 | 0.000 | 0.337 |
| chr 19 | 28555639 12460041 2627641 | 142 | 0.391 | 0.083 | 0.555 | 0.480 | 0.778 |
| chr 19 | 28555639 12460041 2627641 | 442 | 0.870 | 0.831 | 0.642 | 0.780 | 0.294 |
| chr 19 | 28555639 12460041 2627641 | 424 | 0.103 | 0.066 | 0.912 | 0.118 | 0.284 |
| chr 19 | 28555639 12460041 2627641 | 144 | 0.832 | 0.853 | 0.338 | 0.181 | 0.810 |
| chr 19 | 28555639 12460041 2627641 | 444 | 0.758 | 0.986 | 0.477 | 0.027 | 0.873 |
| chr 19 | 12460041 2627641 597668   | 422 | 0.545 | 0.277 | 0.939 | 0.549 | 0.280 |
| chr 19 | 12460041 2627641 597668   | 244 | 0.100 | 0.065 | 0.873 | 0.117 | 0.286 |
| chr 19 | 12460041 2627641 597668   | 444 | 0.653 | 0.902 | 0.891 | 0.128 | 0.710 |
| chr 19 | 2627641 597668 10422797   | 222 | 0.460 | 0.660 | 0.596 | 0.925 | 0.905 |
| chr 19 | 2627641 597668 10422797   | 442 | 0.383 | 0.258 | 0.838 | 0.908 | 0.818 |
| chr 19 | 2627641 597668 10422797   | 224 | 0.720 | 0.179 | 0.880 | 0.453 | 0.243 |
| chr 19 | 2627641 597668 10422797   | 444 | 0.747 | 0.458 | 0.987 | 0.535 | 0.235 |
| chr 19 | 597668 10422797 346763    | 221 | 0.438 | 0.664 | 0.587 | 0.942 | 0.923 |
| chr 19 | 597668 10422797 346763    | 421 | 0.378 | 0.252 | 0.848 | 0.916 | 0.827 |
| chr 19 | 597668 10422797 346763    | 243 | 0.782 | 0.173 | 0.783 | 0.490 | 0.302 |
| chr 19 | 597668 10422797 346763    | 443 | 0.750 | 0.460 | 0.990 | 0.533 | 0.237 |
| chr 19 | 10422797 346763 17356664  | 434 | 0.349 | 0.891 | 0.322 | 0.241 | 0.545 |
| chr 19 | 10422797 346763 17356664  | 212 | 0.868 | 0.243 | 0.651 | 0.714 | 0.980 |
| chr 19 | 10422797 346763 17356664  | 432 | 0.389 | 0.787 | 0.250 | 0.259 | 0.439 |
| chr 19 | 346763 17356664 10445572  | 343 | 0.867 | 0.742 | 0.160 | 0.331 | 0.700 |
| chr 19 | 346763 17356664 10445572  | 323 | 0.799 | 0.505 | 0.975 | 0.524 | 0.966 |
| chr 19 | 346763 17356664 10445572  | 341 | 0.259 | 0.968 | 0.621 | 0.367 | 0.607 |
| chr 19 | 346763 17356664 10445572  | 121 | 0.467 | 0.289 | 0.671 | 0.512 | 0.854 |
| chr 19 | 346763 17356664 10445572  | 321 | 0.227 | 0.306 | 0.185 | 0.054 | 0.367 |
| chr 19 | 17356664 10445572 2240672 | 431 | 0.889 | 0.606 | 0.077 | 0.666 | 0.669 |
| chr 19 | 17356664 10445572 2240672 | 411 | 0.534 | 0.531 | 0.772 | 0.669 | 0.141 |
| chr 19 | 17356664 10445572 2240672 | 211 | 0.320 | 0.747 | 0.519 | 0.138 | 0.337 |
| chr 19 | 17356664 10445572 2240672 | 433 | 0.782 | 0.274 | 0.891 | 0.229 | 0.396 |
| chr 19 | 17356664 10445572 2240672 | 233 | 0.780 | 0.547 | 0.798 | 0.723 | 0.899 |
| chr 19 | 17356664 10445572 2240672 | 413 | 0.300 | 0.944 | 0.837 | 0.629 | 0.683 |
| chr 19 | 17356664 10445572 2240672 | 213 | 0.370 | 0.592 | 0.451 | 0.644 | 0.911 |
| chr 19 | 10445572 2240672 345409   | 312 | 0.583 | 0.391 | 0.050 | 0.470 | 0.524 |
| chr 19 | 10445572 2240672 345409   | 112 | 0.563 | 0.615 | 0.843 | 0.221 | 0.642 |
| chr 19 | 10445572 2240672 345409   | 332 | 0.095 | 0.443 | 0.812 | 0.127 | 0.902 |
| chr 19 | 10445572 2240672 345409   | 132 | 0.511 | 0.861 | 0.550 | 0.608 | 0.783 |
| chr 19 | 10445572 2240672 345409   | 334 | 0.389 | 0.579 | 0.893 | 0.252 | 0.644 |
| chr 19 | 10445572 2240672 345409   | 134 | 0.535 | 0.865 | 0.815 | 0.701 | 0.931 |
| chr 19 | 2240672 345409 11883302   | 122 | 0.103 | 0.344 | 0.217 | 0.068 | 0.597 |
| chr 19 | 2240672 345409 11883302   | 322 | 0.201 | 0.610 | 0.463 | 0.290 | 0.933 |
| chr 19 | 2240672 345409 11883302   | 342 | 0.434 | 0.927 | 0.679 | 0.248 | 0.867 |
| chr 19 | 2240672 345409 11883302   | 124 | 0.128 | 0.190 | 0.002 | 0.135 | 0.770 |
| chr 19 | 2240672 345409 11883302   | 344 | 0.239 | 0.689 | 0.985 | 0.096 | 0.584 |
| chr 19 | 345409 11883302 344807    | 224 | 0.435 | 0.651 | 0.434 | 0.128 | 0.418 |
| chr 19 | 345409 11883302 344807    | 444 | 0.680 | 0.682 | 0.656 | 0.674 | 0.530 |

|               |                         |     |       |       |       |       |       |
|---------------|-------------------------|-----|-------|-------|-------|-------|-------|
| <b>chr 19</b> | 345409 11883302 344807  | 222 | 0.034 | 0.278 | 0.157 | 0.048 | 0.808 |
| <b>chr 19</b> | 345409 11883302 344807  | 422 | 0.440 | 0.999 | 0.922 | 0.239 | 0.975 |
| <b>chr 19</b> | 345409 11883302 344807  | 242 | 0.152 | 0.190 | 0.002 | 0.167 | 0.898 |
| <b>chr 19</b> | 345409 11883302 344807  | 442 | 0.361 | 0.932 | 0.658 | 0.150 | 0.965 |
| <b>chr 19</b> | 11883302 344807 2306660 | 222 | 0.136 | 0.481 | 0.223 | 0.058 | 0.497 |
| <b>chr 19</b> | 11883302 344807 2306660 | 422 | 0.444 | 0.918 | 0.232 | 0.289 | 0.196 |
| <b>chr 19</b> | 11883302 344807 2306660 | 244 | 0.535 | 0.488 | 0.352 | 0.113 | 0.571 |
| <b>chr 19</b> | 11883302 344807 2306660 | 444 | 0.632 | 0.618 | 0.719 | 0.607 | 0.608 |
| <b>chr 19</b> | 11883302 344807 2306660 | 224 | 0.310 | 0.510 | 0.574 | 0.442 | 0.612 |
| <b>chr 19</b> | 11883302 344807 2306660 | 424 | 0.156 | 0.501 | 0.092 | 0.076 | 0.724 |
| <b>chr 19</b> | 344807 2306660 8111989  | 242 | 0.107 | 0.643 | 0.379 | 0.061 | 0.819 |
| <b>chr 19</b> | 344807 2306660 8111989  | 224 | 0.210 | 0.510 | 0.390 | 0.119 | 0.760 |
| <b>chr 19</b> | 344807 2306660 8111989  | 444 | 0.963 | 0.933 | 0.364 | 0.942 | 0.717 |
| <b>chr 19</b> | 344807 2306660 8111989  | 244 | 0.292 | 0.830 | 0.456 | 0.488 | 0.822 |
| <b>chr 19</b> | 2306660 8111989 7260463 | 424 | 0.080 | 0.587 | 0.209 | 0.081 | 0.859 |
| <b>chr 19</b> | 2306660 8111989 7260463 | 244 | 0.437 | 0.145 | 0.448 | 0.758 | 0.721 |
| <b>chr 19</b> | 2306660 8111989 7260463 | 423 | 0.356 | 0.568 | 0.907 | 0.220 | 0.805 |
| <b>chr 19</b> | 2306660 8111989 7260463 | 243 | 0.107 | 0.205 | 0.232 | 0.081 | 0.861 |
| <b>chr 19</b> | 2306660 8111989 7260463 | 443 | 0.648 | 0.864 | 0.854 | 0.622 | 0.667 |
| <b>APP</b>    | 2829961 3787620 373521  | 411 | 0.882 | 0.692 | 0.931 | 0.450 | 0.800 |
| <b>APP</b>    | 2829961 3787620 373521  | 222 | 0.330 | 0.509 | 0.977 | 0.790 | 0.521 |
| <b>APP</b>    | 2829961 3787620 373521  | 212 | 0.956 | 0.306 | 0.397 | 0.274 | 0.698 |
| <b>APP</b>    | 2829961 3787620 373521  | 412 | 0.681 | 0.543 | 0.334 | 0.694 | 0.535 |
| <b>APP</b>    | 3787620 373521 2829973  | 123 | 0.960 | 0.684 | 0.500 | 0.477 | 0.717 |
| <b>APP</b>    | 3787620 373521 2829973  | 111 | 0.712 | 0.849 | 0.880 | 0.535 | 0.642 |
| <b>APP</b>    | 3787620 373521 2829973  | 221 | 0.412 | 0.627 | 0.798 | 0.874 | 0.487 |
| <b>APP</b>    | 3787620 373521 2829973  | 121 | 0.672 | 0.834 | 0.565 | 0.965 | 0.381 |
| <b>APP</b>    | 373521 2829973 1783025  | 212 | 0.766 | 0.980 | 0.417 | 0.921 | 0.851 |
| <b>APP</b>    | 373521 2829973 1783025  | 234 | 0.985 | 0.678 | 0.489 | 0.493 | 0.699 |
| <b>APP</b>    | 373521 2829973 1783025  | 114 | 0.749 | 0.809 | 0.944 | 0.522 | 0.676 |
| <b>APP</b>    | 2829973 1783025 380417  | 124 | 0.511 | 0.082 | 0.057 | 0.726 | 0.486 |
| <b>APP</b>    | 2829973 1783025 380417  | 344 | 0.123 | 0.825 | 0.748 | 0.489 | 0.658 |
| <b>APP</b>    | 2829973 1783025 380417  | 144 | 0.871 | 0.111 | 0.389 | 0.143 | 0.172 |
| <b>APP</b>    | 2829973 1783025 380417  | 122 | 0.228 | 0.030 | 0.317 | 0.480 | 0.494 |
| <b>APP</b>    | 2829973 1783025 380417  | 342 | 0.672 | 0.599 | 0.476 | 0.391 | 0.752 |
| <b>APP</b>    | 2829973 1783025 380417  | 142 | 0.815 | 0.303 | 0.711 | 0.937 | 0.831 |
| <b>APP</b>    | 1783025 380417 1787438  | 244 | 0.724 | 0.267 | 0.206 | 0.476 | 0.089 |
| <b>APP</b>    | 1783025 380417 1787438  | 444 | 0.823 | 0.359 | 0.720 | 0.306 | 0.479 |
| <b>APP</b>    | 1783025 380417 1787438  | 243 | 0.515 | 0.165 | 0.161 | 0.856 | 0.436 |
| <b>APP</b>    | 1783025 380417 1787438  | 443 | 0.478 | 0.462 | 0.683 | 0.251 | 0.141 |
| <b>APP</b>    | 1783025 380417 1787438  | 223 | 0.189 | 0.024 | 0.270 | 0.537 | 0.438 |
| <b>APP</b>    | 1783025 380417 1787438  | 423 | 0.485 | 0.600 | 0.730 | 0.348 | 0.596 |
| <b>APP</b>    | 380417 1787438 17001492 | 432 | 0.663 | 0.181 | 0.375 | 0.187 | 0.792 |
| <b>APP</b>    | 380417 1787438 17001492 | 441 | 0.827 | 0.138 | 0.332 | 0.921 | 0.272 |
| <b>APP</b>    | 380417 1787438 17001492 | 431 | 0.664 | 0.548 | 0.042 | 0.857 | 0.691 |

|            |                          |     |       |       |       |       |       |
|------------|--------------------------|-----|-------|-------|-------|-------|-------|
| <b>APP</b> | 380417 1787438 17001492  | 231 | 0.902 | 0.079 | 0.285 | 0.431 | 0.253 |
| <b>APP</b> | 1787438 17001492 1783016 | 414 | 0.265 | 0.001 | 0.003 | 0.939 | 0.343 |
| <b>APP</b> | 1787438 17001492 1783016 | 314 | 0.900 | 0.837 | 0.310 | 0.122 | 0.959 |
| <b>APP</b> | 1787438 17001492 1783016 | 322 | 0.417 | 0.489 | 0.375 | 0.114 | 0.791 |
| <b>APP</b> | 1787438 17001492 1783016 | 412 | 0.733 | 0.893 | 0.775 | 0.918 | 0.447 |
| <b>APP</b> | 1787438 17001492 1783016 | 312 | 0.833 | 0.166 | 0.381 | 0.622 | 0.406 |
| <b>APP</b> | 17001492 1783016 396969  | 121 | 0.796 | 0.286 | 0.609 | 0.594 | 0.312 |
| <b>APP</b> | 17001492 1783016 396969  | 143 | 0.673 | 0.287 | 0.080 | 0.152 | 0.761 |
| <b>APP</b> | 17001492 1783016 396969  | 223 | 0.449 | 0.495 | 0.333 | 0.128 | 0.754 |
| <b>APP</b> | 17001492 1783016 396969  | 123 | 0.910 | 0.064 | 0.209 | 0.474 | 0.328 |
| <b>APP</b> | 1783016 396969 214488    | 212 | 0.796 | 0.286 | 0.609 | 0.594 | 0.312 |
| <b>APP</b> | 1783016 396969 214488    | 232 | 0.838 | 0.389 | 0.589 | 0.296 | 0.583 |
| <b>APP</b> | 1783016 396969 214488    | 434 | 0.673 | 0.287 | 0.080 | 0.152 | 0.761 |
| <b>APP</b> | 1783016 396969 214488    | 234 | 0.715 | 0.045 | 0.039 | 0.409 | 0.254 |
| <b>APP</b> | 396969 214488 383700     | 121 | 0.796 | 0.286 | 0.609 | 0.594 | 0.312 |
| <b>APP</b> | 396969 214488 383700     | 323 | 0.838 | 0.390 | 0.590 | 0.294 | 0.585 |
| <b>APP</b> | 396969 214488 383700     | 343 | 0.988 | 0.158 | 0.436 | 0.640 | 0.260 |
| <b>APP</b> | 214488 383700 2829984    | 234 | 0.830 | 0.394 | 0.645 | 0.381 | 0.485 |
| <b>APP</b> | 214488 383700 2829984    | 212 | 0.796 | 0.286 | 0.609 | 0.594 | 0.312 |
| <b>APP</b> | 214488 383700 2829984    | 432 | 0.992 | 0.156 | 0.449 | 0.550 | 0.285 |
| <b>APP</b> | 383700 2829984 2234983   | 321 | 0.655 | 0.268 | 0.655 | 0.976 | 0.458 |
| <b>APP</b> | 383700 2829984 2234983   | 343 | 0.807 | 0.388 | 0.664 | 0.303 | 0.529 |
| <b>APP</b> | 383700 2829984 2234983   | 123 | 0.796 | 0.286 | 0.609 | 0.594 | 0.312 |
| <b>APP</b> | 383700 2829984 2234983   | 323 | 0.730 | 0.749 | 0.820 | 0.728 | 0.678 |
| <b>APP</b> | 2829984 2234983 216779   | 432 | 0.537 | 0.408 | 0.070 | 0.912 | 0.473 |
| <b>APP</b> | 2829984 2234983 216779   | 232 | 0.306 | 0.686 | 0.125 | 0.122 | 0.970 |
| <b>APP</b> | 2829984 2234983 216779   | 211 | 0.655 | 0.268 | 0.655 | 0.976 | 0.458 |
| <b>APP</b> | 2829984 2234983 216779   | 431 | 0.457 | 0.635 | 0.467 | 0.241 | 0.791 |
| <b>APP</b> | 2829984 2234983 216779   | 231 | 0.851 | 0.639 | 0.611 | 0.921 | 0.867 |
| <b>APP</b> | 2234983 216779 400603    | 313 | 0.592 | 0.709 | 0.721 | 0.868 | 0.337 |
| <b>APP</b> | 2234983 216779 400603    | 321 | 0.808 | 0.753 | 0.021 | 0.330 | 0.594 |
| <b>APP</b> | 2234983 216779 400603    | 111 | 0.655 | 0.268 | 0.655 | 0.976 | 0.458 |
| <b>APP</b> | 2234983 216779 400603    | 311 | 0.588 | 0.603 | 0.261 | 0.505 | 0.811 |
| <b>APP</b> | 216779 400603 2829997    | 133 | 0.592 | 0.709 | 0.721 | 0.868 | 0.337 |
| <b>APP</b> | 216779 400603 2829997    | 213 | 0.810 | 0.744 | 0.021 | 0.320 | 0.586 |
| <b>APP</b> | 216779 400603 2829997    | 113 | 0.509 | 0.385 | 0.797 | 0.919 | 0.462 |
| <b>APP</b> | 216779 400603 2829997    | 111 | 0.472 | 0.751 | 0.200 | 0.461 | 0.802 |
| <b>APP</b> | 400603 2829997 440666    | 334 | 0.592 | 0.709 | 0.721 | 0.868 | 0.337 |
| <b>APP</b> | 400603 2829997 440666    | 134 | 0.624 | 0.238 | 0.663 | 0.981 | 0.414 |
| <b>APP</b> | 400603 2829997 440666    | 132 | 0.994 | 0.433 | 0.010 | 0.238 | 0.506 |
| <b>APP</b> | 400603 2829997 440666    | 112 | 0.472 | 0.751 | 0.200 | 0.461 | 0.802 |
| <b>APP</b> | 2829997 440666 2014146   | 343 | 0.233 | 0.449 | 0.491 | 0.195 | 0.011 |
| <b>APP</b> | 2829997 440666 2014146   | 323 | 0.907 | 0.410 | 0.059 | 0.140 | 0.650 |
| <b>APP</b> | 2829997 440666 2014146   | 123 | 0.314 | 0.622 | 0.021 | 0.640 | 0.189 |
| <b>APP</b> | 2829997 440666 2014146   | 341 | 0.601 | 0.311 | 0.739 | 0.825 | 0.642 |

|            |                         |     |       |       |       |       |       |
|------------|-------------------------|-----|-------|-------|-------|-------|-------|
| <b>APP</b> | 2829997 440666 2014146  | 321 | 0.923 | 0.659 | 0.037 | 0.629 | 0.575 |
| <b>APP</b> | 2829997 440666 2014146  | 121 | 0.747 | 0.421 | 0.280 | 0.810 | 0.278 |
| <b>APP</b> | 440666 2014146 216762   | 434 | 0.043 | 0.044 | 0.140 | 0.101 | 0.041 |
| <b>APP</b> | 440666 2014146 216762   | 234 | 0.296 | 0.783 | 0.081 | 0.956 | 0.240 |
| <b>APP</b> | 440666 2014146 216762   | 414 | 0.818 | 0.040 | 0.181 | 0.481 | 0.369 |
| <b>APP</b> | 440666 2014146 216762   | 412 | 0.425 | 0.631 | 0.498 | 0.766 | 0.191 |
| <b>APP</b> | 440666 2014146 216762   | 212 | 0.753 | 0.414 | 0.095 | 0.834 | 0.226 |
| <b>APP</b> | 2014146 216762 2070657  | 123 | 0.684 | 0.168 | 0.275 | 0.979 | 0.573 |
| <b>APP</b> | 2014146 216762 2070657  | 341 | 0.470 | 0.947 | 0.131 | 0.796 | 0.108 |
| <b>APP</b> | 2014146 216762 2070657  | 141 | 0.899 | 0.082 | 0.342 | 0.714 | 0.457 |
| <b>APP</b> | 2014146 216762 2070657  | 121 | 0.573 | 0.971 | 0.187 | 0.986 | 0.083 |
| <b>APP</b> | 216762 2070657 7276036  | 231 | 0.766 | 0.261 | 0.306 | 0.935 | 0.665 |
| <b>APP</b> | 216762 2070657 7276036  | 411 | 0.713 | 0.511 | 0.048 | 0.567 | 0.814 |
| <b>APP</b> | 216762 2070657 7276036  | 211 | 0.604 | 0.601 | 0.578 | 0.629 | 0.336 |
| <b>APP</b> | 216762 2070657 7276036  | 413 | 0.499 | 0.262 | 0.011 | 0.911 | 0.052 |
| <b>APP</b> | 216762 2070657 7276036  | 213 | 0.491 | 0.924 | 0.222 | 0.902 | 0.045 |
| <b>APP</b> | 2070657 7276036 2830000 | 311 | 0.719 | 0.251 | 0.273 | 0.927 | 0.616 |
| <b>APP</b> | 2070657 7276036 2830000 | 111 | 0.574 | 0.452 | 0.090 | 0.920 | 0.483 |
| <b>APP</b> | 2070657 7276036 2830000 | 132 | 0.950 | 0.149 | 0.079 | 0.985 | 0.851 |
| <b>APP</b> | 7276036 2830000 2830001 | 111 | 0.543 | 0.433 | 0.134 | 0.893 | 0.381 |
| <b>APP</b> | 7276036 2830000 2830001 | 113 | 0.708 | 0.257 | 0.231 | 0.914 | 0.565 |
| <b>APP</b> | 7276036 2830000 2830001 | 323 | 0.930 | 0.154 | 0.072 | 0.967 | 0.877 |
| <b>APP</b> | 2830000 2830001 7278838 | 111 | 0.841 | 0.275 | 0.067 | 0.654 | 0.361 |
| <b>APP</b> | 2830000 2830001 7278838 | 131 | 0.826 | 0.718 | 0.352 | 0.244 | 0.392 |
| <b>APP</b> | 2830000 2830001 7278838 | 231 | 0.311 | 0.356 | 0.095 | 0.069 | 0.204 |
| <b>APP</b> | 2830000 2830001 7278838 | 132 | 0.385 | 0.193 | 0.449 | 0.228 | 0.895 |
| <b>APP</b> | 2830000 2830001 7278838 | 232 | 0.475 | 0.060 | 0.007 | 0.295 | 0.368 |
| <b>APP</b> | 2830001 7278838 2830008 | 312 | 0.548 | 0.320 | 0.078 | 0.741 | 0.106 |
| <b>APP</b> | 2830001 7278838 2830008 | 322 | 0.252 | 0.876 | 0.617 | 0.388 | 0.997 |
| <b>APP</b> | 2830001 7278838 2830008 | 114 | 0.772 | 0.268 | 0.081 | 0.453 | 0.243 |
| <b>APP</b> | 2830001 7278838 2830008 | 324 | 0.937 | 0.265 | 0.025 | 0.940 | 0.287 |
| <b>APP</b> | 7278838 2830008 2830012 | 121 | 0.652 | 0.398 | 0.148 | 0.771 | 0.145 |
| <b>APP</b> | 7278838 2830008 2830012 | 221 | 0.561 | 0.958 | 0.750 | 0.427 | 0.814 |
| <b>APP</b> | 7278838 2830008 2830012 | 141 | 0.379 | 0.543 | 0.130 | 0.696 | 0.328 |
| <b>APP</b> | 7278838 2830008 2830012 | 241 | 0.926 | 0.520 | 0.277 | 0.338 | 0.157 |
| <b>APP</b> | 7278838 2830008 2830012 | 123 | 0.579 | 0.571 | 0.233 | 0.116 | 0.420 |
| <b>APP</b> | 7278838 2830008 2830012 | 243 | 0.905 | 0.372 | 0.004 | 0.831 | 0.072 |
| <b>APP</b> | 2830008 2830012 2226330 | 411 | 0.434 | 0.331 | 0.230 | 0.608 | 0.697 |
| <b>APP</b> | 2830008 2830012 2226330 | 212 | 0.825 | 0.424 | 0.190 | 0.643 | 0.139 |
| <b>APP</b> | 2830008 2830012 2226330 | 412 | 0.938 | 0.416 | 0.181 | 0.303 | 0.350 |
| <b>APP</b> | 2830008 2830012 2226330 | 232 | 0.652 | 0.515 | 0.217 | 0.144 | 0.451 |
| <b>APP</b> | 2830008 2830012 2226330 | 432 | 0.988 | 0.419 | 0.007 | 0.747 | 0.056 |
| <b>APP</b> | 2830012 2226330 2830017 | 114 | 0.434 | 0.331 | 0.230 | 0.608 | 0.697 |
| <b>APP</b> | 2830012 2226330 2830017 | 122 | 0.882 | 0.823 | 0.058 | 0.315 | 0.059 |
| <b>APP</b> | 2830012 2226330 2830017 | 322 | 0.890 | 0.570 | 0.021 | 0.401 | 0.096 |

|            |                         |     |       |       |       |       |       |
|------------|-------------------------|-----|-------|-------|-------|-------|-------|
| <b>APP</b> | 2226330 2830017 2830018 | 143 | 0.434 | 0.331 | 0.230 | 0.608 | 0.697 |
| <b>APP</b> | 2226330 2830017 2830018 | 221 | 0.434 | 0.337 | 0.214 | 0.696 | 0.619 |
| <b>APP</b> | 2830017 2830018 768039  | 214 | 0.983 | 0.824 | 0.432 | 0.683 | 0.219 |
| <b>APP</b> | 2830017 2830018 768039  | 432 | 0.428 | 0.340 | 0.210 | 0.688 | 0.630 |
| <b>APP</b> | 2830017 2830018 768039  | 212 | 0.807 | 0.588 | 0.738 | 0.599 | 0.177 |
| <b>APP</b> | 2830018 768039 2830028  | 124 | 0.497 | 0.546 | 0.140 | 0.793 | 0.831 |
| <b>APP</b> | 2830018 768039 2830028  | 143 | 0.974 | 0.828 | 0.502 | 0.566 | 0.183 |
| <b>APP</b> | 2830018 768039 2830028  | 323 | 0.364 | 0.584 | 0.554 | 0.814 | 0.101 |
| <b>APP</b> | 2830018 768039 2830028  | 123 | 0.736 | 0.305 | 0.354 | 0.474 | 0.270 |
| <b>APP</b> | 768039 2830028 3991     | 434 | 0.981 | 0.374 | 0.962 | 0.884 | 0.241 |
| <b>APP</b> | 768039 2830028 3991     | 234 | 0.936 | 0.558 | 0.380 | 0.302 | 0.375 |
| <b>APP</b> | 768039 2830028 3991     | 243 | 0.515 | 0.430 | 0.086 | 0.752 | 0.589 |
| <b>APP</b> | 768039 2830028 3991     | 433 | 0.959 | 0.497 | 0.473 | 0.574 | 0.369 |
| <b>APP</b> | 768039 2830028 3991     | 233 | 0.556 | 0.134 | 0.894 | 0.893 | 0.997 |
| <b>APP</b> | 2830028 3991 2830033    | 344 | 0.937 | 0.922 | 0.437 | 0.412 | 0.818 |
| <b>APP</b> | 2830028 3991 2830033    | 334 | 0.228 | 0.259 | 0.243 | 0.728 | 0.136 |
| <b>APP</b> | 2830028 3991 2830033    | 432 | 0.520 | 0.422 | 0.103 | 0.843 | 0.555 |
| <b>APP</b> | 2830028 3991 2830033    | 332 | 0.328 | 0.217 | 0.223 | 0.718 | 0.186 |
| <b>APP</b> | 3991 2830033 2830036    | 324 | 0.670 | 0.260 | 0.228 | 0.632 | 0.995 |
| <b>APP</b> | 3991 2830033 2830036    | 442 | 0.937 | 0.922 | 0.437 | 0.412 | 0.818 |
| <b>APP</b> | 3991 2830033 2830036    | 342 | 0.228 | 0.259 | 0.243 | 0.728 | 0.136 |
| <b>APP</b> | 3991 2830033 2830036    | 322 | 0.433 | 0.148 | 0.429 | 0.366 | 0.400 |
| <b>APP</b> | 2830033 2830036 2830038 | 243 | 0.730 | 0.260 | 0.217 | 0.648 | 0.978 |
| <b>APP</b> | 2830033 2830036 2830038 | 223 | 0.562 | 0.065 | 0.812 | 0.784 | 0.502 |
| <b>APP</b> | 2830033 2830036 2830038 | 421 | 0.639 | 0.558 | 0.876 | 0.567 | 0.325 |
| <b>APP</b> | 2830033 2830036 2830038 | 221 | 0.679 | 0.833 | 0.322 | 0.454 | 0.685 |
| <b>APP</b> | 2830036 2830038 7283136 | 232 | 0.913 | 0.676 | 0.721 | 0.414 | 0.936 |
| <b>APP</b> | 2830036 2830038 7283136 | 434 | 0.730 | 0.260 | 0.217 | 0.648 | 0.978 |
| <b>APP</b> | 2830036 2830038 7283136 | 234 | 0.429 | 0.052 | 0.984 | 0.671 | 0.293 |
| <b>APP</b> | 2830036 2830038 7283136 | 214 | 0.977 | 0.725 | 0.239 | 0.826 | 0.592 |
| <b>APP</b> | 2830038 7283136 2830040 | 144 | 0.110 | 0.284 | 0.366 | 0.933 | 0.363 |
| <b>APP</b> | 2830038 7283136 2830040 | 322 | 0.913 | 0.676 | 0.721 | 0.414 | 0.936 |
| <b>APP</b> | 2830038 7283136 2830040 | 342 | 0.872 | 0.882 | 0.277 | 0.509 | 0.550 |
| <b>APP</b> | 2830038 7283136 2830040 | 142 | 0.362 | 0.376 | 0.484 | 0.813 | 0.336 |
| <b>APP</b> | 7283136 2830040 731523  | 224 | 0.437 | 0.694 | 0.496 | 0.971 | 0.561 |
| <b>APP</b> | 7283136 2830040 731523  | 442 | 0.111 | 0.287 | 0.364 | 0.937 | 0.365 |
| <b>APP</b> | 7283136 2830040 731523  | 222 | 0.571 | 0.804 | 0.422 | 0.368 | 0.664 |
| <b>APP</b> | 7283136 2830040 731523  | 422 | 0.255 | 0.272 | 0.677 | 0.595 | 0.537 |
| <b>APP</b> | 2830040 731523 2830044  | 422 | 0.111 | 0.286 | 0.366 | 0.938 | 0.364 |
| <b>APP</b> | 2830040 731523 2830044  | 222 | 0.796 | 0.808 | 0.599 | 0.367 | 0.974 |
| <b>APP</b> | 2830040 731523 2830044  | 244 | 0.437 | 0.694 | 0.496 | 0.971 | 0.561 |
| <b>APP</b> | 2830040 731523 2830044  | 224 | 0.454 | 0.685 | 0.263 | 0.413 | 0.568 |
| <b>APP</b> | 731523 2830044 2830051  | 442 | 0.437 | 0.694 | 0.496 | 0.971 | 0.561 |
| <b>APP</b> | 731523 2830044 2830051  | 242 | 0.681 | 0.191 | 0.345 | 0.958 | 0.466 |
| <b>APP</b> | 731523 2830044 2830051  | 224 | 0.586 | 0.837 | 0.287 | 0.438 | 0.583 |

|            |                           |     |       |       |       |       |       |
|------------|---------------------------|-----|-------|-------|-------|-------|-------|
| <b>APP</b> | 731523 2830044 2830051    | 244 | 0.290 | 0.160 | 0.689 | 0.391 | 0.260 |
| <b>APP</b> | 2830044 2830051 2830052   | 442 | 0.197 | 0.135 | 0.895 | 0.856 | 0.126 |
| <b>APP</b> | 2830044 2830051 2830052   | 424 | 0.438 | 0.146 | 0.519 | 0.966 | 0.312 |
| <b>APP</b> | 2830044 2830051 2830052   | 244 | 0.495 | 0.795 | 0.193 | 0.592 | 0.591 |
| <b>APP</b> | 2830044 2830051 2830052   | 444 | 0.980 | 0.885 | 0.701 | 0.408 | 0.833 |
| <b>APP</b> | 2830051 2830052 11702267  | 424 | 0.386 | 0.894 | 0.285 | 0.225 | 0.867 |
| <b>APP</b> | 2830051 2830052 11702267  | 422 | 0.038 | 0.073 | 0.826 | 0.445 | 0.082 |
| <b>APP</b> | 2830051 2830052 11702267  | 242 | 0.470 | 0.125 | 0.451 | 0.908 | 0.432 |
| <b>APP</b> | 2830051 2830052 11702267  | 442 | 0.405 | 0.784 | 0.304 | 0.874 | 0.411 |
| <b>APP</b> | 2830052 11702267 2830054  | 243 | 0.365 | 0.871 | 0.308 | 0.230 | 0.865 |
| <b>APP</b> | 2830052 11702267 2830054  | 223 | 0.126 | 0.167 | 0.588 | 0.754 | 0.052 |
| <b>APP</b> | 2830052 11702267 2830054  | 423 | 0.947 | 0.581 | 0.793 | 0.213 | 0.176 |
| <b>APP</b> | 2830052 11702267 2830054  | 424 | 0.125 | 0.216 | 0.527 | 0.397 | 0.505 |
| <b>APP</b> | 11702267 2830054 12482262 | 233 | 0.324 | 0.335 | 0.117 | 0.082 | 0.210 |
| <b>APP</b> | 11702267 2830054 12482262 | 431 | 0.591 | 0.888 | 0.252 | 0.279 | 0.908 |
| <b>APP</b> | 11702267 2830054 12482262 | 231 | 0.316 | 0.662 | 0.340 | 0.676 | 0.192 |
| <b>APP</b> | 11702267 2830054 12482262 | 241 | 0.393 | 0.477 | 0.791 | 0.614 | 0.447 |
| <b>APP</b> | 2830054 12482262 2256331  | 333 | 0.728 | 0.885 | 0.248 | 0.102 | 0.752 |
| <b>APP</b> | 2830054 12482262 2256331  | 313 | 0.447 | 0.496 | 0.866 | 0.885 | 0.181 |
| <b>APP</b> | 2830054 12482262 2256331  | 413 | 0.694 | 0.162 | 0.778 | 0.865 | 0.983 |
| <b>APP</b> | 2830054 12482262 2256331  | 334 | 0.291 | 0.219 | 0.258 | 0.361 | 0.145 |
| <b>APP</b> | 2830054 12482262 2256331  | 414 | 0.573 | 0.826 | 0.661 | 0.547 | 0.476 |
| <b>APP</b> | 12482262 2256331 3827166  | 133 | 0.425 | 0.085 | 0.698 | 0.887 | 0.984 |
| <b>APP</b> | 12482262 2256331 3827166  | 334 | 0.749 | 0.861 | 0.535 | 0.076 | 0.846 |
| <b>APP</b> | 12482262 2256331 3827166  | 134 | 0.324 | 0.353 | 0.918 | 0.923 | 0.198 |
| <b>APP</b> | 12482262 2256331 3827166  | 344 | 0.592 | 0.306 | 0.160 | 0.339 | 0.120 |
| <b>APP</b> | 12482262 2256331 3827166  | 144 | 0.513 | 0.994 | 0.505 | 0.516 | 0.446 |
| <b>APP</b> | 2256331 3827166 2830058   | 332 | 0.425 | 0.085 | 0.698 | 0.887 | 0.984 |
| <b>APP</b> | 2256331 3827166 2830058   | 344 | 0.296 | 0.384 | 0.963 | 0.607 | 0.223 |
| <b>APP</b> | 2256331 3827166 2830058   | 444 | 0.614 | 0.781 | 0.769 | 0.697 | 0.243 |
| <b>APP</b> | 3827166 2830058 2830068   | 444 | 0.302 | 0.339 | 0.940 | 0.796 | 0.213 |
| <b>APP</b> | 3827166 2830058 2830068   | 322 | 0.449 | 0.085 | 0.698 | 0.878 | 0.985 |
| <b>APP</b> | 3827166 2830058 2830068   | 442 | 0.628 | 0.839 | 0.749 | 0.885 | 0.236 |
| <b>APP</b> | 2830058 2830068 2830076   | 444 | 0.397 | 0.458 | 0.985 | 0.839 | 0.238 |
| <b>APP</b> | 2830058 2830068 2830076   | 424 | 0.656 | 0.278 | 0.188 | 0.896 | 0.549 |
| <b>APP</b> | 2830058 2830068 2830076   | 222 | 0.449 | 0.085 | 0.698 | 0.878 | 0.985 |
| <b>APP</b> | 2830058 2830068 2830076   | 422 | 0.532 | 0.928 | 0.468 | 0.883 | 0.316 |
| <b>APP</b> | 2830068 2830076 2830079   | 223 | 0.493 | 0.063 | 0.616 | 0.607 | 0.755 |
| <b>APP</b> | 2830068 2830076 2830079   | 441 | 0.400 | 0.453 | 0.975 | 0.823 | 0.236 |
| <b>APP</b> | 2830068 2830076 2830079   | 241 | 0.656 | 0.278 | 0.188 | 0.895 | 0.549 |
| <b>APP</b> | 2830068 2830076 2830079   | 221 | 0.529 | 0.944 | 0.420 | 0.538 | 0.436 |
| <b>APP</b> | 2830076 2830079 466609    | 213 | 0.044 | 0.183 | 0.169 | 0.090 | 0.531 |
| <b>APP</b> | 2830076 2830079 466609    | 234 | 0.493 | 0.063 | 0.616 | 0.607 | 0.755 |
| <b>APP</b> | 2830076 2830079 466609    | 414 | 0.355 | 0.260 | 0.636 | 0.835 | 0.344 |
| <b>APP</b> | 2830076 2830079 466609    | 214 | 0.112 | 0.561 | 0.109 | 0.120 | 0.295 |

|            |                           |     |       |       |       |       |       |
|------------|---------------------------|-----|-------|-------|-------|-------|-------|
| <b>APP</b> | 2830079 466609 12482753   | 343 | 0.830 | 0.682 | 0.649 | 0.057 | 0.447 |
| <b>APP</b> | 2830079 466609 12482753   | 131 | 0.044 | 0.185 | 0.167 | 0.092 | 0.533 |
| <b>APP</b> | 2830079 466609 12482753   | 341 | 0.415 | 0.069 | 0.725 | 0.832 | 0.977 |
| <b>APP</b> | 2830079 466609 12482753   | 141 | 0.389 | 0.567 | 0.167 | 0.109 | 0.852 |
| <b>APP</b> | 466609 12482753 375369    | 431 | 0.817 | 0.708 | 0.647 | 0.054 | 0.459 |
| <b>APP</b> | 466609 12482753 375369    | 411 | 0.654 | 0.901 | 0.548 | 0.879 | 0.433 |
| <b>APP</b> | 466609 12482753 375369    | 313 | 0.044 | 0.185 | 0.167 | 0.092 | 0.533 |
| <b>APP</b> | 466609 12482753 375369    | 413 | 0.090 | 0.571 | 0.125 | 0.099 | 0.338 |
| <b>APP</b> | 12482753 375369 2830088   | 312 | 0.818 | 0.707 | 0.647 | 0.054 | 0.458 |
| <b>APP</b> | 12482753 375369 2830088   | 112 | 0.746 | 0.717 | 0.685 | 0.936 | 0.248 |
| <b>APP</b> | 12482753 375369 2830088   | 114 | 0.710 | 0.371 | 0.374 | 0.701 | 0.286 |
| <b>APP</b> | 12482753 375369 2830088   | 134 | 0.629 | 0.828 | 0.447 | 0.497 | 0.499 |
| <b>APP</b> | 375369 2830088 17588612   | 122 | 0.859 | 0.924 | 0.287 | 0.512 | 0.655 |
| <b>APP</b> | 375369 2830088 17588612   | 124 | 0.768 | 0.671 | 0.239 | 0.321 | 0.456 |
| <b>APP</b> | 375369 2830088 17588612   | 144 | 0.710 | 0.371 | 0.374 | 0.701 | 0.286 |
| <b>APP</b> | 375369 2830088 17588612   | 344 | 0.629 | 0.828 | 0.447 | 0.497 | 0.499 |
| <b>APP</b> | 2830088 17588612 10460695 | 241 | 0.414 | 0.085 | 0.732 | 0.842 | 0.973 |
| <b>APP</b> | 2830088 17588612 10460695 | 223 | 0.846 | 0.947 | 0.295 | 0.531 | 0.645 |
| <b>APP</b> | 2830088 17588612 10460695 | 243 | 0.343 | 0.420 | 0.291 | 0.201 | 0.429 |
| <b>APP</b> | 2830088 17588612 10460695 | 443 | 0.695 | 0.653 | 0.595 | 0.543 | 0.339 |
| <b>APP</b> | 17588612 10460695 2186302 | 232 | 0.837 | 0.967 | 0.296 | 0.540 | 0.634 |
| <b>APP</b> | 17588612 10460695 2186302 | 432 | 0.363 | 0.327 | 0.351 | 0.485 | 0.285 |
| <b>APP</b> | 17588612 10460695 2186302 | 414 | 0.414 | 0.085 | 0.732 | 0.842 | 0.973 |
| <b>APP</b> | 17588612 10460695 2186302 | 434 | 0.728 | 0.757 | 0.681 | 0.914 | 0.235 |
| <b>APP</b> | 10460695 2186302 13049230 | 323 | 0.340 | 0.443 | 0.881 | 0.802 | 0.219 |
| <b>APP</b> | 10460695 2186302 13049230 | 141 | 0.414 | 0.085 | 0.732 | 0.842 | 0.973 |
| <b>APP</b> | 10460695 2186302 13049230 | 341 | 0.728 | 0.757 | 0.681 | 0.914 | 0.235 |
| <b>APP</b> | 2186302 13049230 370345   | 232 | 0.340 | 0.443 | 0.881 | 0.802 | 0.219 |
| <b>APP</b> | 2186302 13049230 370345   | 412 | 0.616 | 0.766 | 0.267 | 0.118 | 0.177 |
| <b>APP</b> | 2186302 13049230 370345   | 414 | 0.268 | 0.344 | 0.529 | 0.393 | 0.488 |
| <b>APP</b> | 13049230 370345 6516727   | 323 | 0.343 | 0.446 | 0.884 | 0.808 | 0.223 |
| <b>APP</b> | 13049230 370345 6516727   | 123 | 0.938 | 0.802 | 0.542 | 0.083 | 0.474 |
| <b>APP</b> | 13049230 370345 6516727   | 121 | 0.592 | 0.346 | 0.269 | 0.687 | 0.300 |
| <b>APP</b> | 13049230 370345 6516727   | 141 | 0.271 | 0.346 | 0.528 | 0.395 | 0.491 |
| <b>APP</b> | 370345 6516727 2830104    | 233 | 0.351 | 0.151 | 0.693 | 0.751 | 0.910 |
| <b>APP</b> | 370345 6516727 2830104    | 413 | 0.657 | 0.161 | 0.491 | 0.874 | 0.895 |
| <b>APP</b> | 370345 6516727 2830104    | 231 | 0.238 | 0.319 | 0.681 | 0.487 | 0.319 |
| <b>APP</b> | 370345 6516727 2830104    | 211 | 0.586 | 0.339 | 0.264 | 0.674 | 0.301 |
| <b>APP</b> | 370345 6516727 2830104    | 411 | 0.424 | 0.964 | 0.293 | 0.349 | 0.555 |
| <b>APP</b> | 6516727 2830104 462281    | 113 | 0.754 | 0.430 | 0.302 | 0.660 | 0.261 |
| <b>APP</b> | 6516727 2830104 462281    | 331 | 0.351 | 0.151 | 0.693 | 0.750 | 0.910 |
| <b>APP</b> | 6516727 2830104 462281    | 131 | 0.657 | 0.161 | 0.491 | 0.874 | 0.895 |
| <b>APP</b> | 6516727 2830104 462281    | 311 | 0.238 | 0.319 | 0.681 | 0.487 | 0.319 |
| <b>APP</b> | 6516727 2830104 462281    | 111 | 0.463 | 0.996 | 0.306 | 0.348 | 0.570 |
| <b>APP</b> | 2830104 462281 466448     | 133 | 0.753 | 0.421 | 0.292 | 0.650 | 0.261 |
| <b>APP</b> | 2830104 462281 466448     | 313 | 0.482 | 0.086 | 0.529 | 0.855 | 0.913 |
| <b>APP</b> | 2830104 462281 466448     | 113 | 0.371 | 0.704 | 0.791 | 0.925 | 0.398 |

|            |         |        |         |     |       |       |       |       |       |
|------------|---------|--------|---------|-----|-------|-------|-------|-------|-------|
| <b>APP</b> | 2830104 | 462281 | 466448  | 111 | 0.636 | 0.565 | 0.700 | 0.705 | 0.662 |
| <b>APP</b> | 462281  | 466448 | 438031  | 132 | 0.136 | 0.026 | 0.844 | 0.976 | 0.587 |
| <b>APP</b> | 462281  | 466448 | 438031  | 334 | 0.753 | 0.421 | 0.292 | 0.650 | 0.261 |
| <b>APP</b> | 462281  | 466448 | 438031  | 134 | 0.132 | 0.422 | 0.969 | 0.839 | 0.239 |
| <b>APP</b> | 462281  | 466448 | 438031  | 114 | 0.644 | 0.562 | 0.645 | 0.735 | 0.674 |
| <b>APP</b> | 466448  | 438031 | 2156079 | 341 | 0.082 | 0.430 | 0.935 | 0.913 | 0.100 |
| <b>APP</b> | 466448  | 438031 | 2156079 | 323 | 0.149 | 0.030 | 0.870 | 0.997 | 0.579 |
| <b>APP</b> | 466448  | 438031 | 2156079 | 343 | 0.753 | 0.550 | 0.522 | 0.305 | 0.051 |
| <b>APP</b> | 466448  | 438031 | 2156079 | 143 | 0.644 | 0.562 | 0.645 | 0.735 | 0.674 |

**S4. Haplotype analyses of Cognitive Phenotypes in LBC1936 dataset.** Results shown are p values and were considered significant if  $p < 0.00056$ . \* indicates a p value significant at corrected threshold level  $p \leq 0.00056$ . The following abbreviations are used: GCA11, general cognitive ability at age 11 (MHT adjusted for age); GCA70, general cognitive ability at age 70 (MHT adjusted for age); LM, logical memory; MR, matrix reasoning; VF, verbal fluency.

| Gene       | dbSNP ID (rs) |          |          | HAPLOTYPE | GCA11 | GCA70 | VF    | MR    | LM    |
|------------|---------------|----------|----------|-----------|-------|-------|-------|-------|-------|
| <b>CR1</b> | 9429940       | 1571344  | 2025935  | 244       | 0.931 | 0.442 | 0.027 | 0.154 | 0.821 |
| <b>CR1</b> | 9429940       | 1571344  | 2025935  | 222       | 0.594 | 0.786 | 0.634 | 0.444 | 0.208 |
| <b>CR1</b> | 9429940       | 1571344  | 2025935  | 442       | 0.366 | 0.290 | 0.708 | 0.920 | 0.768 |
| <b>CR1</b> | 9429940       | 1571344  | 2025935  | 242       | 0.362 | 0.181 | 0.122 | 0.073 | 0.218 |
| <b>CR1</b> | 1571344       | 2025935  | 4310446  | 422       | 0.746 | 0.965 | 0.074 | 0.432 | 0.153 |
| <b>CR1</b> | 1571344       | 2025935  | 4310446  | 444       | 0.931 | 0.442 | 0.027 | 0.154 | 0.821 |
| <b>CR1</b> | 1571344       | 2025935  | 4310446  | 224       | 0.661 | 0.382 | 0.569 | 0.454 | 0.566 |
| <b>CR1</b> | 1571344       | 2025935  | 4310446  | 424       | 0.581 | 0.578 | 0.717 | 0.207 | 0.872 |
| <b>CR1</b> | 2025935       | 4310446  | 11117959 | 443       | 0.338 | 0.508 | 0.999 | 0.382 | 0.921 |
| <b>CR1</b> | 2025935       | 4310446  | 11117959 | 243       | 0.632 | 0.519 | 0.107 | 0.891 | 0.127 |
| <b>CR1</b> | 2025935       | 4310446  | 11117959 | 221       | 0.822 | 0.736 | 0.084 | 0.354 | 0.364 |
| <b>CR1</b> | 2025935       | 4310446  | 11117959 | 441       | 0.784 | 0.513 | 0.025 | 0.200 | 0.833 |
| <b>CR1</b> | 2025935       | 4310446  | 11117959 | 241       | 0.559 | 0.125 | 0.722 | 0.500 | 0.617 |
| <b>CR1</b> | 4310446       | 11117959 | 6656401  | 211       | 0.858 | 0.615 | 0.103 | 0.745 | 0.202 |
| <b>CR1</b> | 4310446       | 11117959 | 6656401  | 411       | 0.632 | 0.926 | 0.106 | 0.428 | 0.953 |
| <b>CR1</b> | 4310446       | 11117959 | 6656401  | 233       | 0.407 | 0.469 | 0.570 | 0.698 | 0.774 |
| <b>CR1</b> | 4310446       | 11117959 | 6656401  | 433       | 0.471 | 0.486 | 0.095 | 0.890 | 0.133 |
| <b>CR1</b> | 4310446       | 11117959 | 6656401  | 213       | 0.862 | 0.723 | 0.482 | 0.301 | 0.560 |
| <b>CR1</b> | 4310446       | 11117959 | 6656401  | 413       | 0.497 | 0.420 | 0.043 | 0.821 | 0.714 |
| <b>CR1</b> | 11117959      | 6656401  | 10127904 | 133       | 0.854 | 0.541 | 0.132 | 0.268 | 0.600 |
| <b>CR1</b> | 11117959      | 6656401  | 10127904 | 114       | 0.957 | 0.586 | 0.566 | 0.880 | 0.300 |
| <b>CR1</b> | 11117959      | 6656401  | 10127904 | 334       | 0.377 | 0.416 | 0.136 | 0.787 | 0.169 |
| <b>CR1</b> | 11117959      | 6656401  | 10127904 | 134       | 0.417 | 0.110 | 0.826 | 0.164 | 0.534 |
| <b>CR1</b> | 6656401       | 10127904 | 650877   | 343       | 0.461 | 0.497 | 0.158 | 0.789 | 0.183 |
| <b>CR1</b> | 6656401       | 10127904 | 650877   | 331       | 0.854 | 0.541 | 0.132 | 0.268 | 0.600 |
| <b>CR1</b> | 6656401       | 10127904 | 650877   | 141       | 0.957 | 0.586 | 0.566 | 0.880 | 0.300 |
| <b>CR1</b> | 6656401       | 10127904 | 650877   | 341       | 0.484 | 0.136 | 0.871 | 0.166 | 0.554 |
| <b>CR1</b> | 10127904      | 650877   | 3818361  | 414       | 0.789 | 0.502 | 0.452 | 0.782 | 0.516 |
| <b>CR1</b> | 10127904      | 650877   | 3818361  | 432       | 0.461 | 0.497 | 0.158 | 0.789 | 0.183 |
| <b>CR1</b> | 10127904      | 650877   | 3818361  | 312       | 0.932 | 0.609 | 0.168 | 0.294 | 0.677 |
| <b>CR1</b> | 10127904      | 650877   | 3818361  | 412       | 0.374 | 0.104 | 0.748 | 0.130 | 0.362 |
| <b>PS2</b> | 1150895       | 2073489  | 1295640  | 222       | 0.206 | 0.989 | 0.042 | 0.803 | 0.980 |
| <b>PS2</b> | 1150895       | 2073489  | 1295640  | 422       | 0.652 | 0.578 | 0.636 | 0.560 | 0.198 |
| <b>PS2</b> | 1150895       | 2073489  | 1295640  | 444       | 0.853 | 0.347 | 0.036 | 0.970 | 0.353 |
| <b>PS2</b> | 1150895       | 2073489  | 1295640  | 424       | 0.577 | 0.616 | 0.937 | 0.344 | 0.761 |
| <b>PS2</b> | 2073489       | 1295640  | 2802268  | 443       | 0.365 | 0.103 | 0.135 | 0.831 | 0.629 |
| <b>PS2</b> | 2073489       | 1295640  | 2802268  | 224       | 0.574 | 0.630 | 0.044 | 0.477 | 0.246 |
| <b>PS2</b> | 2073489       | 1295640  | 2802268  | 444       | 0.554 | 0.606 | 0.255 | 0.778 | 0.469 |
| <b>PS2</b> | 2073489       | 1295640  | 2802268  | 244       | 0.577 | 0.616 | 0.937 | 0.344 | 0.761 |
| <b>PS2</b> | 1295640       | 2802268  | 16846644 | 244       | 0.614 | 0.755 | 0.312 | 0.542 | 0.452 |
| <b>PS2</b> | 1295640       | 2802268  | 16846644 | 433       | 0.365 | 0.103 | 0.135 | 0.831 | 0.629 |
| <b>PS2</b> | 1295640       | 2802268  | 16846644 | 243       | 0.208 | 0.804 | 0.174 | 0.834 | 0.546 |
| <b>PS2</b> | 1295640       | 2802268  | 16846644 | 443       | 0.917 | 0.440 | 0.378 | 0.375 | 0.419 |
| <b>PS2</b> | 2802268       | 16846644 | 12126925 | 331       | 0.382 | 0.399 | 0.793 | 0.792 | 0.920 |
| <b>PS2</b> | 2802268       | 16846644 | 12126925 | 431       | 0.323 | 0.620 | 0.913 | 0.783 | 0.995 |
| <b>PS2</b> | 2802268       | 16846644 | 12126925 | 443       | 0.667 | 0.767 | 0.335 | 0.570 | 0.405 |

|             |          |          |          |     |       |       |       |       |       |
|-------------|----------|----------|----------|-----|-------|-------|-------|-------|-------|
| <b>PS2</b>  | 2802268  | 16846644 | 12126925 | 333 | 0.458 | 0.053 | 0.100 | 0.771 | 0.593 |
| <b>PS2</b>  | 2802268  | 16846644 | 12126925 | 433 | 0.685 | 0.529 | 0.734 | 0.609 | 0.760 |
| <b>BIN1</b> | 4662703  | 880436   | 3768857  | 341 | 0.434 | 0.475 | 0.053 | 0.629 | 0.734 |
| <b>BIN1</b> | 4662703  | 880436   | 3768857  | 343 | 0.596 | 0.189 | 0.323 | 0.950 | 0.560 |
| <b>BIN1</b> | 4662703  | 880436   | 3768857  | 123 | 0.975 | 0.440 | 0.532 | 0.984 | 0.489 |
| <b>BIN1</b> | 880436   | 3768857  | 17014873 | 232 | 0.049 | 0.057 | 0.745 | 0.212 | 0.112 |
| <b>BIN1</b> | 880436   | 3768857  | 17014873 | 411 | 0.476 | 0.572 | 0.054 | 0.717 | 0.837 |
| <b>BIN1</b> | 880436   | 3768857  | 17014873 | 431 | 0.528 | 0.197 | 0.351 | 0.887 | 0.568 |
| <b>BIN1</b> | 880436   | 3768857  | 17014873 | 231 | 0.285 | 0.679 | 0.625 | 0.396 | 0.791 |
| <b>BIN1</b> | 3768857  | 17014873 | 2276575  | 323 | 0.238 | 0.129 | 0.135 | 0.192 | 0.044 |
| <b>BIN1</b> | 3768857  | 17014873 | 2276575  | 313 | 0.021 | 0.376 | 0.010 | 0.480 | 0.525 |
| <b>BIN1</b> | 3768857  | 17014873 | 2276575  | 321 | 0.101 | 0.202 | 0.082 | 0.536 | 0.664 |
| <b>BIN1</b> | 3768857  | 17014873 | 2276575  | 111 | 0.406 | 0.529 | 0.052 | 0.635 | 0.869 |
| <b>BIN1</b> | 3768857  | 17014873 | 2276575  | 311 | 0.891 | 0.412 | 0.541 | 0.640 | 0.788 |
| <b>BIN1</b> | 17014873 | 2276575  | 13430599 | 234 | 0.227 | 0.128 | 0.125 | 0.213 | 0.044 |
| <b>BIN1</b> | 17014873 | 2276575  | 13430599 | 134 | 0.017 | 0.361 | 0.012 | 0.446 | 0.510 |
| <b>BIN1</b> | 17014873 | 2276575  | 13430599 | 213 | 0.102 | 0.194 | 0.080 | 0.487 | 0.643 |
| <b>BIN1</b> | 17014873 | 2276575  | 13430599 | 113 | 0.397 | 0.677 | 0.022 | 0.862 | 0.652 |
| <b>BIN1</b> | 2276575  | 13430599 | 10194375 | 341 | 0.104 | 0.855 | 0.113 | 0.876 | 0.799 |
| <b>BIN1</b> | 2276575  | 13430599 | 10194375 | 131 | 0.843 | 0.552 | 0.478 | 0.851 | 0.472 |
| <b>BIN1</b> | 2276575  | 13430599 | 10194375 | 132 | 0.235 | 0.781 | 0.437 | 0.795 | 0.758 |
| <b>BIN1</b> | 13430599 | 10194375 | 13426725 | 412 | 0.123 | 0.863 | 0.101 | 0.946 | 0.719 |
| <b>BIN1</b> | 13430599 | 10194375 | 13426725 | 314 | 0.843 | 0.552 | 0.478 | 0.851 | 0.472 |
| <b>BIN1</b> | 13430599 | 10194375 | 13426725 | 324 | 0.235 | 0.781 | 0.437 | 0.795 | 0.758 |
| <b>BIN1</b> | 10194375 | 13426725 | 10200967 | 242 | 0.745 | 0.097 | 0.785 | 0.396 | 0.714 |
| <b>BIN1</b> | 10194375 | 13426725 | 10200967 | 124 | 0.123 | 0.863 | 0.101 | 0.946 | 0.719 |
| <b>BIN1</b> | 10194375 | 13426725 | 10200967 | 144 | 0.936 | 0.563 | 0.455 | 0.773 | 0.405 |
| <b>BIN1</b> | 10194375 | 13426725 | 10200967 | 244 | 0.388 | 0.278 | 0.340 | 0.660 | 0.994 |
| <b>BIN1</b> | 13426725 | 10200967 | 17014923 | 444 | 0.105 | 0.036 | 0.113 | 0.655 | 0.027 |
| <b>BIN1</b> | 13426725 | 10200967 | 17014923 | 422 | 0.725 | 0.101 | 0.812 | 0.371 | 0.747 |
| <b>BIN1</b> | 13426725 | 10200967 | 17014923 | 242 | 0.123 | 0.863 | 0.101 | 0.946 | 0.719 |
| <b>BIN1</b> | 13426725 | 10200967 | 17014923 | 442 | 0.752 | 0.892 | 0.805 | 0.287 | 0.020 |
| <b>BIN1</b> | 10200967 | 17014923 | 6709337  | 221 | 0.738 | 0.098 | 0.795 | 0.387 | 0.725 |
| <b>BIN1</b> | 10200967 | 17014923 | 6709337  | 421 | 0.100 | 0.839 | 0.130 | 0.943 | 0.481 |
| <b>BIN1</b> | 10200967 | 17014923 | 6709337  | 442 | 0.105 | 0.036 | 0.113 | 0.655 | 0.027 |
| <b>BIN1</b> | 10200967 | 17014923 | 6709337  | 422 | 0.807 | 0.916 | 0.886 | 0.254 | 0.009 |
| <b>BIN1</b> | 17014923 | 6709337  | 11678252 | 423 | 0.105 | 0.036 | 0.113 | 0.655 | 0.027 |
| <b>BIN1</b> | 17014923 | 6709337  | 11678252 | 223 | 0.649 | 0.712 | 0.632 | 0.257 | 0.362 |
| <b>BIN1</b> | 17014923 | 6709337  | 11678252 | 211 | 0.325 | 0.126 | 0.170 | 0.438 | 0.406 |
| <b>BIN1</b> | 17014923 | 6709337  | 11678252 | 221 | 0.428 | 0.601 | 0.751 | 0.792 | 0.020 |
| <b>BIN1</b> | 6709337  | 11678252 | 873270   | 213 | 0.330 | 0.584 | 0.752 | 0.679 | 0.017 |
| <b>BIN1</b> | 6709337  | 11678252 | 873270   | 231 | 0.090 | 0.043 | 0.090 | 0.550 | 0.306 |
| <b>BIN1</b> | 6709337  | 11678252 | 873270   | 111 | 0.325 | 0.126 | 0.170 | 0.438 | 0.406 |
| <b>BIN1</b> | 11678252 | 873270   | 749008   | 132 | 0.330 | 0.584 | 0.752 | 0.679 | 0.017 |
| <b>BIN1</b> | 11678252 | 873270   | 749008   | 312 | 0.118 | 0.034 | 0.134 | 0.885 | 0.056 |
| <b>BIN1</b> | 11678252 | 873270   | 749008   | 314 | 0.629 | 0.755 | 0.590 | 0.389 | 0.499 |
| <b>BIN1</b> | 11678252 | 873270   | 749008   | 114 | 0.391 | 0.128 | 0.167 | 0.372 | 0.389 |
| <b>BIN1</b> | 873270   | 749008   | 6743470  | 124 | 0.118 | 0.034 | 0.134 | 0.885 | 0.056 |
| <b>BIN1</b> | 873270   | 749008   | 6743470  | 323 | 0.330 | 0.584 | 0.752 | 0.679 | 0.017 |
| <b>BIN1</b> | 873270   | 749008   | 6743470  | 143 | 0.919 | 0.314 | 0.275 | 0.806 | 0.742 |
| <b>BIN1</b> | 749008   | 6743470  | 4663098  | 434 | 0.660 | 0.063 | 0.454 | 0.754 | 0.499 |
| <b>BIN1</b> | 4 749008 | 6743470  | 4663098  | 242 | 0.155 | 0.048 | 0.169 | 0.993 | 0.082 |

|               |                            |     |       |       |       |       |       |
|---------------|----------------------------|-----|-------|-------|-------|-------|-------|
| <b>BIN1</b>   | 749008 6743470 4663098     | 232 | 0.403 | 0.692 | 0.854 | 0.796 | 0.026 |
| <b>BIN1</b>   | 749008 6743470 4663098     | 432 | 0.873 | 0.648 | 0.627 | 0.940 | 0.769 |
| <b>BIN1</b>   | 6743470 4663098 744373     | 322 | 0.803 | 0.825 | 0.802 | 0.403 | 0.132 |
| <b>BIN1</b>   | 6743470 4663098 744373     | 344 | 0.703 | 0.053 | 0.549 | 0.876 | 0.533 |
| <b>BIN1</b>   | 6743470 4663098 744373     | 424 | 0.284 | 0.081 | 0.109 | 0.900 | 0.061 |
| <b>BIN1</b>   | 6743470 4663098 744373     | 324 | 0.766 | 0.905 | 0.609 | 0.683 | 0.423 |
| <b>CLU</b>    | 7012010 10101779 10503814  | 224 | 0.619 | 0.723 | 0.632 | 0.770 | 0.303 |
| <b>CLU</b>    | 7012010 10101779 10503814  | 222 | 0.324 | 0.999 | 0.198 | 0.570 | 0.820 |
| <b>CLU</b>    | 7012010 10101779 10503814  | 242 | 0.444 | 0.391 | 0.567 | 0.942 | 0.140 |
| <b>CLU</b>    | 7012010 10101779 10503814  | 442 | 0.441 | 0.748 | 0.131 | 0.627 | 0.956 |
| <b>CLU</b>    | 10101779 10503814 11136000 | 424 | 0.291 | 0.593 | 0.036 | 0.867 | 0.877 |
| <b>CLU</b>    | 10101779 10503814 11136000 | 242 | 0.623 | 0.713 | 0.648 | 0.776 | 0.313 |
| <b>CLU</b>    | 10101779 10503814 11136000 | 222 | 0.325 | 0.994 | 0.195 | 0.572 | 0.826 |
| <b>CLU</b>    | 10101779 10503814 11136000 | 422 | 0.872 | 0.961 | 0.417 | 0.764 | 0.899 |
| <b>CLU</b>    | 10503814 11136000 9314349  | 243 | 0.524 | 0.726 | 0.162 | 0.943 | 0.286 |
| <b>CLU</b>    | 10503814 11136000 9314349  | 423 | 0.749 | 0.077 | 0.258 | 0.690 | 0.249 |
| <b>CLU</b>    | 10503814 11136000 9314349  | 223 | 0.319 | 0.620 | 0.375 | 0.435 | 0.633 |
| <b>CLU</b>    | 10503814 11136000 9314349  | 241 | 0.117 | 0.422 | 0.159 | 0.820 | 0.405 |
| <b>CLU</b>    | 10503814 11136000 9314349  | 221 | 0.835 | 0.676 | 0.184 | 0.635 | 0.426 |
| <b>CLU</b>    | 11136000 9314349 492638    | 434 | 0.440 | 0.569 | 0.040 | 0.461 | 0.278 |
| <b>CLU</b>    | 11136000 9314349 492638    | 414 | 0.175 | 0.237 | 0.188 | 0.664 | 0.636 |
| <b>CLU</b>    | 11136000 9314349 492638    | 214 | 0.303 | 0.386 | 0.179 | 0.065 | 0.247 |
| <b>CLU</b>    | 11136000 9314349 492638    | 433 | 0.232 | 0.304 | 0.608 | 0.826 | 0.486 |
| <b>CLU</b>    | 11136000 9314349 492638    | 233 | 0.465 | 0.391 | 0.244 | 0.603 | 0.280 |
| <b>CLU</b>    | 11136000 9314349 492638    | 413 | 0.375 | 0.978 | 0.563 | 0.771 | 0.483 |
| <b>CLU</b>    | 11136000 9314349 492638    | 213 | 0.920 | 0.557 | 0.441 | 0.296 | 0.745 |
| <b>PICALM</b> | 10898425 618679 2077815    | 443 | 0.855 | 0.917 | 0.354 | 0.243 | 0.180 |
| <b>PICALM</b> | 10898425 618679 2077815    | 243 | 0.496 | 0.728 | 0.821 | 0.847 | 0.770 |
| <b>PICALM</b> | 10898425 618679 2077815    | 431 | 0.061 | 0.536 | 0.186 | 0.568 | 0.390 |
| <b>PICALM</b> | 10898425 618679 2077815    | 231 | 0.131 | 0.665 | 0.088 | 0.435 | 0.771 |
| <b>PICALM</b> | 618679 2077815 10898427    | 313 | 0.105 | 0.206 | 0.303 | 0.228 | 0.319 |
| <b>PICALM</b> | 618679 2077815 10898427    | 431 | 0.611 | 0.793 | 0.563 | 0.756 | 0.421 |
| <b>PICALM</b> | 618679 2077815 10898427    | 311 | 0.294 | 0.356 | 0.187 | 0.407 | 0.770 |
| <b>PICALM</b> | 2077815 10898427 11234495  | 134 | 0.103 | 0.206 | 0.333 | 0.218 | 0.318 |
| <b>PICALM</b> | 2077815 10898427 11234495  | 114 | 0.922 | 0.394 | 0.725 | 0.464 | 0.173 |
| <b>PICALM</b> | 2077815 10898427 11234495  | 312 | 0.611 | 0.793 | 0.563 | 0.756 | 0.421 |
| <b>PICALM</b> | 2077815 10898427 11234495  | 112 | 0.313 | 0.559 | 0.261 | 0.259 | 0.814 |
| <b>PICALM</b> | 10898427 11234495 510566   | 121 | 0.460 | 0.984 | 0.898 | 0.301 | 0.369 |
| <b>PICALM</b> | 10898427 11234495 510566   | 342 | 0.106 | 0.206 | 0.295 | 0.231 | 0.320 |
| <b>PICALM</b> | 10898427 11234495 510566   | 142 | 0.919 | 0.395 | 0.741 | 0.471 | 0.174 |
| <b>PICALM</b> | 10898427 11234495 510566   | 122 | 0.064 | 0.466 | 0.534 | 0.702 | 0.297 |
| <b>PICALM</b> | 11234495 510566 10501602   | 223 | 0.236 | 0.599 | 0.213 | 0.748 | 0.599 |
| <b>PICALM</b> | 11234495 510566 10501602   | 211 | 0.462 | 0.917 | 0.948 | 0.293 | 0.374 |
| <b>PICALM</b> | 11234495 510566 10501602   | 421 | 0.128 | 0.395 | 0.434 | 0.134 | 0.705 |
| <b>PICALM</b> | 11234495 510566 10501602   | 221 | 0.291 | 0.255 | 0.758 | 0.519 | 0.493 |
| <b>PICALM</b> | 510566 10501602 10501604   | 211 | 0.671 | 0.536 | 0.577 | 0.040 | 0.691 |
| <b>PICALM</b> | 510566 10501602 10501604   | 233 | 0.247 | 0.656 | 0.209 | 0.756 | 0.613 |
| <b>PICALM</b> | 510566 10501602 10501604   | 113 | 0.459 | 0.978 | 0.925 | 0.294 | 0.369 |
| <b>PICALM</b> | 510566 10501602 10501604   | 213 | 0.928 | 0.414 | 0.573 | 0.353 | 0.948 |
| <b>PICALM</b> | 10501602 10501604 713346   | 112 | 0.675 | 0.552 | 0.582 | 0.036 | 0.675 |
| <b>PICALM</b> | 10501602 10501604 713346   | 132 | 0.117 | 0.294 | 0.567 | 0.066 | 0.769 |

|               |          |          |          |     |       |       |       |       |       |
|---------------|----------|----------|----------|-----|-------|-------|-------|-------|-------|
| <b>PICALM</b> | 10501602 | 10501604 | 713346   | 331 | 0.211 | 0.614 | 0.227 | 0.661 | 0.621 |
| <b>PICALM</b> | 10501602 | 10501604 | 713346   | 131 | 0.747 | 0.810 | 0.412 | 0.375 | 0.579 |
| <b>PICALM</b> | 10501604 | 713346   | 475639   | 122 | 0.675 | 0.552 | 0.582 | 0.036 | 0.675 |
| <b>PICALM</b> | 10501604 | 713346   | 475639   | 322 | 0.119 | 0.293 | 0.519 | 0.060 | 0.803 |
| <b>PICALM</b> | 10501604 | 713346   | 475639   | 312 | 0.327 | 0.236 | 0.511 | 0.833 | 0.173 |
| <b>PICALM</b> | 10501604 | 713346   | 475639   | 314 | 0.046 | 0.398 | 0.539 | 0.718 | 0.349 |
| <b>PICALM</b> | 713346   | 475639   | 669336   | 121 | 0.243 | 0.085 | 0.458 | 0.632 | 0.042 |
| <b>PICALM</b> | 713346   | 475639   | 669336   | 223 | 0.160 | 0.910 | 0.909 | 0.558 | 0.859 |
| <b>PICALM</b> | 713346   | 475639   | 669336   | 123 | 0.872 | 0.389 | 0.938 | 0.555 | 0.283 |
| <b>PICALM</b> | 713346   | 475639   | 669336   | 143 | 0.046 | 0.398 | 0.539 | 0.718 | 0.349 |
| <b>PICALM</b> | 475639   | 669336   | 7938033  | 212 | 0.359 | 0.098 | 0.160 | 0.938 | 0.069 |
| <b>PICALM</b> | 475639   | 669336   | 7938033  | 232 | 0.195 | 0.629 | 0.938 | 0.413 | 0.525 |
| <b>PICALM</b> | 475639   | 669336   | 7938033  | 432 | 0.817 | 0.276 | 0.435 | 0.765 | 0.900 |
| <b>PICALM</b> | 475639   | 669336   | 7938033  | 211 | 0.376 | 0.247 | 0.876 | 0.554 | 0.152 |
| <b>PICALM</b> | 475639   | 669336   | 7938033  | 431 | 0.054 | 0.099 | 0.937 | 0.871 | 0.287 |
| <b>PICALM</b> | 669336   | 7938033  | 10792820 | 322 | 0.149 | 0.868 | 0.876 | 0.593 | 0.776 |
| <b>PICALM</b> | 669336   | 7938033  | 10792820 | 121 | 0.286 | 0.097 | 0.199 | 0.898 | 0.117 |
| <b>PICALM</b> | 669336   | 7938033  | 10792820 | 321 | 0.698 | 0.528 | 0.455 | 0.955 | 0.855 |
| <b>PICALM</b> | 669336   | 7938033  | 10792820 | 111 | 0.410 | 0.240 | 0.818 | 0.537 | 0.113 |
| <b>PICALM</b> | 669336   | 7938033  | 10792820 | 311 | 0.059 | 0.096 | 0.904 | 0.882 | 0.247 |
| <b>PICALM</b> | 7938033  | 10792820 | 527162   | 112 | 0.624 | 0.830 | 0.545 | 0.865 | 0.359 |
| <b>PICALM</b> | 7938033  | 10792820 | 527162   | 224 | 0.149 | 0.868 | 0.876 | 0.593 | 0.776 |
| <b>PICALM</b> | 7938033  | 10792820 | 527162   | 214 | 0.937 | 0.211 | 0.852 | 0.827 | 0.734 |
| <b>PICALM</b> | 7938033  | 10792820 | 527162   | 114 | 0.284 | 0.423 | 0.683 | 0.631 | 0.576 |
| <b>PICALM</b> | 10792820 | 527162   | 680119   | 124 | 0.608 | 0.824 | 0.561 | 0.860 | 0.370 |
| <b>PICALM</b> | 10792820 | 527162   | 680119   | 144 | 0.443 | 0.182 | 0.919 | 0.723 | 0.785 |
| <b>PICALM</b> | 10792820 | 527162   | 680119   | 242 | 0.150 | 0.893 | 0.877 | 0.521 | 0.725 |
| <b>PICALM</b> | 10792820 | 527162   | 680119   | 142 | 0.801 | 0.138 | 0.526 | 0.966 | 0.523 |
| <b>PICALM</b> | 527162   | 680119   | 10792821 | 422 | 0.096 | 0.177 | 0.325 | 0.196 | 0.309 |
| <b>PICALM</b> | 527162   | 680119   | 10792821 | 244 | 0.608 | 0.823 | 0.563 | 0.860 | 0.369 |
| <b>PICALM</b> | 527162   | 680119   | 10792821 | 444 | 0.443 | 0.182 | 0.917 | 0.722 | 0.784 |
| <b>PICALM</b> | 527162   | 680119   | 10792821 | 424 | 0.727 | 0.839 | 0.206 | 0.590 | 0.606 |
| <b>PICALM</b> | 680119   | 10792821 | 642949   | 222 | 0.096 | 0.189 | 0.325 | 0.239 | 0.277 |
| <b>PICALM</b> | 680119   | 10792821 | 642949   | 242 | 0.104 | 0.504 | 0.518 | 0.233 | 0.329 |
| <b>PICALM</b> | 680119   | 10792821 | 642949   | 444 | 0.310 | 0.193 | 0.630 | 0.669 | 0.709 |
| <b>PICALM</b> | 680119   | 10792821 | 642949   | 244 | 0.093 | 0.769 | 0.057 | 0.738 | 0.184 |
| <b>PICALM</b> | 10792821 | 642949   | 666682   | 222 | 0.096 | 0.189 | 0.325 | 0.239 | 0.277 |
| <b>PICALM</b> | 10792821 | 642949   | 666682   | 422 | 0.104 | 0.504 | 0.518 | 0.233 | 0.329 |
| <b>PICALM</b> | 10792821 | 642949   | 666682   | 442 | 0.268 | 0.247 | 0.256 | 0.840 | 0.315 |
| <b>PICALM</b> | 10792821 | 642949   | 666682   | 444 | 0.080 | 0.438 | 0.608 | 0.807 | 0.363 |
| <b>PICALM</b> | 642949   | 666682   | 664629   | 223 | 0.008 | 0.121 | 0.435 | 0.042 | 0.012 |
| <b>PICALM</b> | 642949   | 666682   | 664629   | 423 | 0.439 | 0.627 | 0.361 | 0.429 | 0.805 |
| <b>PICALM</b> | 642949   | 666682   | 664629   | 443 | 0.353 | 0.726 | 0.480 | 0.570 | 0.730 |
| <b>PICALM</b> | 642949   | 666682   | 664629   | 221 | 0.387 | 0.528 | 0.314 | 0.025 | 0.782 |
| <b>PICALM</b> | 642949   | 666682   | 664629   | 421 | 0.292 | 0.128 | 0.383 | 0.143 | 0.119 |
| <b>PICALM</b> | 642949   | 666682   | 664629   | 441 | 0.225 | 0.292 | 0.960 | 0.512 | 0.472 |
| <b>PICALM</b> | 666682   | 664629   | 17745273 | 413 | 0.279 | 0.154 | 0.833 | 0.765 | 0.833 |
| <b>PICALM</b> | 666682   | 664629   | 17745273 | 231 | 0.057 | 0.389 | 0.653 | 0.033 | 0.050 |
| <b>PICALM</b> | 666682   | 664629   | 17745273 | 431 | 0.307 | 0.587 | 0.287 | 0.617 | 0.750 |
| <b>PICALM</b> | 666682   | 664629   | 17745273 | 211 | 0.826 | 0.932 | 0.852 | 0.008 | 0.350 |
| <b>PICALM</b> | 666682   | 664629   | 17745273 | 411 | 0.781 | 0.929 | 0.532 | 0.589 | 0.388 |
| <b>PICALM</b> | 664629   | 17745273 | 1941375  | 313 | 0.090 | 0.452 | 0.698 | 0.076 | 0.073 |

|               |                          |     |       |       |       |       |       |
|---------------|--------------------------|-----|-------|-------|-------|-------|-------|
| <b>PICALM</b> | 664629 17745273 1941375  | 131 | 0.279 | 0.154 | 0.833 | 0.765 | 0.833 |
| <b>PICALM</b> | 664629 17745273 1941375  | 311 | 0.431 | 0.570 | 0.364 | 0.914 | 0.879 |
| <b>PICALM</b> | 664629 17745273 1941375  | 111 | 0.844 | 0.880 | 0.547 | 0.049 | 0.132 |
| <b>PICALM</b> | 17745273 1941375 677909  | 113 | 0.301 | 0.706 | 0.687 | 0.980 | 0.383 |
| <b>PICALM</b> | 17745273 1941375 677909  | 131 | 0.063 | 0.447 | 0.744 | 0.070 | 0.061 |
| <b>PICALM</b> | 17745273 1941375 677909  | 311 | 0.279 | 0.154 | 0.833 | 0.765 | 0.833 |
| <b>PICALM</b> | 17745273 1941375 677909  | 111 | 0.802 | 0.812 | 0.748 | 0.024 | 0.409 |
| <b>PICALM</b> | 1941375 677909 11234532  | 111 | 0.284 | 0.660 | 0.134 | 0.122 | 0.925 |
| <b>PICALM</b> | 1941375 677909 11234532  | 133 | 0.301 | 0.706 | 0.687 | 0.980 | 0.383 |
| <b>PICALM</b> | 1941375 677909 11234532  | 313 | 0.063 | 0.447 | 0.744 | 0.070 | 0.061 |
| <b>PICALM</b> | 1941375 677909 11234532  | 113 | 0.133 | 0.174 | 0.350 | 0.561 | 0.411 |
| <b>PICALM</b> | 677909 11234532 10501608 | 111 | 0.284 | 0.660 | 0.134 | 0.122 | 0.925 |
| <b>PICALM</b> | 677909 11234532 10501608 | 131 | 0.433 | 0.660 | 0.260 | 0.264 | 0.692 |
| <b>PICALM</b> | 677909 11234532 10501608 | 333 | 0.301 | 0.706 | 0.687 | 0.980 | 0.383 |
| <b>PICALM</b> | 677909 11234532 10501608 | 133 | 0.531 | 0.387 | 0.932 | 0.107 | 0.281 |
| <b>PICALM</b> | 11234532 10501608 669556 | 333 | 0.611 | 0.793 | 0.563 | 0.756 | 0.421 |
| <b>PICALM</b> | 11234532 10501608 669556 | 111 | 0.284 | 0.660 | 0.134 | 0.122 | 0.925 |
| <b>PICALM</b> | 11234532 10501608 669556 | 311 | 0.433 | 0.660 | 0.260 | 0.264 | 0.692 |
| <b>PICALM</b> | 11234532 10501608 669556 | 331 | 0.995 | 0.723 | 0.354 | 0.141 | 0.384 |
| <b>PICALM</b> | 10501608 669556 621942   | 314 | 0.366 | 0.915 | 0.617 | 0.102 | 0.547 |
| <b>PICALM</b> | 10501608 669556 621942   | 333 | 0.611 | 0.793 | 0.563 | 0.756 | 0.421 |
| <b>PICALM</b> | 10501608 669556 621942   | 113 | 0.647 | 0.516 | 0.554 | 0.043 | 0.745 |
| <b>PICALM</b> | 10501608 669556 621942   | 313 | 0.434 | 0.676 | 0.203 | 0.988 | 0.766 |
| <b>PICALM</b> | 669556 621942 536841     | 332 | 0.611 | 0.793 | 0.563 | 0.756 | 0.421 |
| <b>PICALM</b> | 669556 621942 536841     | 132 | 0.795 | 0.271 | 0.224 | 0.693 | 0.981 |
| <b>PICALM</b> | 669556 621942 536841     | 144 | 0.367 | 0.918 | 0.617 | 0.103 | 0.550 |
| <b>PICALM</b> | 669556 621942 536841     | 134 | 0.821 | 0.502 | 0.948 | 0.217 | 0.950 |
| <b>PICALM</b> | 621942 536841 541458     | 322 | 0.567 | 0.509 | 0.601 | 0.937 | 0.542 |
| <b>PICALM</b> | 621942 536841 541458     | 444 | 0.665 | 0.918 | 0.617 | 0.103 | 0.550 |
| <b>PICALM</b> | 621942 536841 541458     | 344 | 0.821 | 0.502 | 0.948 | 0.217 | 0.950 |
| <b>PICALM</b> | 536841 541458 3851179    | 221 | 0.616 | 0.316 | 0.970 | 0.914 | 0.660 |
| <b>PICALM</b> | 536841 541458 3851179    | 441 | 0.073 | 0.039 | 0.099 | 0.514 | 0.335 |
| <b>PICALM</b> | 536841 541458 3851179    | 223 | 0.761 | 0.270 | 0.037 | 0.516 | 0.524 |
| <b>PICALM</b> | 536841 541458 3851179    | 443 | 0.620 | 0.079 | 0.661 | 0.771 | 0.984 |
| <b>PS1</b>    | 362412 214273 8006497    | 223 | 0.019 | 0.131 | 0.691 | 0.117 | 0.129 |
| <b>PS1</b>    | 362412 214273 8006497    | 241 | 0.826 | 0.684 | 0.989 | 0.331 | 0.359 |
| <b>PS1</b>    | 362412 214273 8006497    | 421 | 0.945 | 0.984 | 0.652 | 0.229 | 0.743 |
| <b>PS1</b>    | 362412 214273 8006497    | 221 | 0.235 | 0.797 | 0.562 | 0.443 | 0.968 |
| <b>PS1</b>    | 214273 8006497 362350    | 213 | 0.568 | 0.831 | 0.614 | 0.233 | 0.191 |
| <b>PS1</b>    | 214273 8006497 362350    | 231 | 0.019 | 0.131 | 0.691 | 0.117 | 0.129 |
| <b>PS1</b>    | 214273 8006497 362350    | 411 | 0.835 | 0.649 | 0.946 | 0.375 | 0.353 |
| <b>PS1</b>    | 214273 8006497 362350    | 211 | 0.371 | 0.709 | 0.949 | 0.382 | 0.313 |
| <b>PS1</b>    | 8006497 362350 214260    | 131 | 0.568 | 0.831 | 0.614 | 0.233 | 0.191 |
| <b>PS1</b>    | 8006497 362350 214260    | 111 | 0.997 | 0.563 | 0.367 | 0.135 | 0.235 |
| <b>PS1</b>    | 8006497 362350 214260    | 313 | 0.019 | 0.130 | 0.691 | 0.118 | 0.129 |
| <b>PS1</b>    | 8006497 362350 214260    | 113 | 0.448 | 0.193 | 0.630 | 0.301 | 0.475 |
| <b>PS1</b>    | 362350 214260 165933     | 134 | 0.498 | 0.773 | 0.760 | 0.869 | 0.906 |
| <b>PS1</b>    | 362350 214260 165933     | 312 | 0.568 | 0.831 | 0.614 | 0.233 | 0.191 |
| <b>PS1</b>    | 362350 214260 165933     | 112 | 0.996 | 0.564 | 0.367 | 0.134 | 0.235 |
| <b>PS1</b>    | 362350 214260 165933     | 132 | 0.392 | 0.756 | 0.964 | 0.717 | 0.959 |
| <b>PS1</b>    | 214260 165933 362377     | 121 | 0.908 | 0.378 | 0.500 | 0.104 | 0.264 |

|               |          |          |          |     |       |       |       |       |       |
|---------------|----------|----------|----------|-----|-------|-------|-------|-------|-------|
| <i>PS1</i>    | 214260   | 165933   | 362377   | 343 | 0.498 | 0.773 | 0.760 | 0.869 | 0.906 |
| <i>PS1</i>    | 214260   | 165933   | 362377   | 123 | 0.514 | 0.924 | 0.803 | 0.214 | 0.246 |
| <i>PS1</i>    | 214260   | 165933   | 362377   | 323 | 0.392 | 0.756 | 0.964 | 0.717 | 0.959 |
| <i>PS1</i>    | 165933   | 362377   | 165935   | 233 | 0.189 | 0.708 | 0.455 | 0.946 | 0.775 |
| <i>PS1</i>    | 165933   | 362377   | 165935   | 211 | 0.908 | 0.378 | 0.500 | 0.104 | 0.264 |
| <i>PS1</i>    | 165933   | 362377   | 165935   | 431 | 0.415 | 0.740 | 0.879 | 0.860 | 0.999 |
| <i>PS1</i>    | 165933   | 362377   | 165935   | 231 | 0.332 | 0.992 | 0.293 | 0.228 | 0.570 |
| <i>PS1</i>    | 362377   | 165935   | 362346   | 111 | 0.908 | 0.378 | 0.500 | 0.104 | 0.264 |
| <i>PS1</i>    | 362377   | 165935   | 362346   | 333 | 0.162 | 0.726 | 0.524 | 0.872 | 0.835 |
| <i>PS1</i>    | 362377   | 165935   | 362346   | 313 | 0.149 | 0.831 | 0.292 | 0.232 | 0.616 |
| <i>chr 19</i> | 7247764  | 28555639 | 12460041 | 242 | 0.138 | 0.459 | 0.545 | 0.169 | 0.406 |
| <i>chr 19</i> | 7247764  | 28555639 | 12460041 | 414 | 0.416 | 0.966 | 0.417 | 0.787 | 0.826 |
| <i>chr 19</i> | 7247764  | 28555639 | 12460041 | 244 | 0.089 | 0.800 | 0.215 | 0.270 | 0.832 |
| <i>chr 19</i> | 7247764  | 28555639 | 12460041 | 444 | 0.219 | 0.604 | 0.864 | 0.228 | 0.684 |
| <i>chr 19</i> | 28555639 | 12460041 | 2627641  | 142 | 0.183 | 0.094 | 0.052 | 0.128 | 0.471 |
| <i>chr 19</i> | 28555639 | 12460041 | 2627641  | 442 | 0.425 | 0.568 | 0.136 | 0.819 | 0.345 |
| <i>chr 19</i> | 28555639 | 12460041 | 2627641  | 424 | 0.129 | 0.461 | 0.529 | 0.159 | 0.409 |
| <i>chr 19</i> | 28555639 | 12460041 | 2627641  | 144 | 0.943 | 0.196 | 0.667 | 0.404 | 0.787 |
| <i>chr 19</i> | 28555639 | 12460041 | 2627641  | 444 | 0.418 | 0.964 | 0.908 | 0.464 | 0.685 |
| <i>chr 19</i> | 12460041 | 2627641  | 597668   | 422 | 0.999 | 0.180 | 0.801 | 0.556 | 0.243 |
| <i>chr 19</i> | 12460041 | 2627641  | 597668   | 244 | 0.129 | 0.461 | 0.529 | 0.158 | 0.409 |
| <i>chr 19</i> | 12460041 | 2627641  | 597668   | 444 | 0.363 | 0.422 | 0.892 | 0.780 | 0.552 |
| <i>chr 19</i> | 2627641  | 597668   | 10422797 | 222 | 0.686 | 0.636 | 0.243 | 0.820 | 0.261 |
| <i>chr 19</i> | 2627641  | 597668   | 10422797 | 442 | 0.820 | 0.299 | 0.177 | 0.598 | 0.684 |
| <i>chr 19</i> | 2627641  | 597668   | 10422797 | 224 | 0.865 | 0.109 | 0.829 | 0.477 | 0.091 |
| <i>chr 19</i> | 2627641  | 597668   | 10422797 | 444 | 0.943 | 0.317 | 0.505 | 0.460 | 0.205 |
| <i>chr 19</i> | 597668   | 10422797 | 346763   | 221 | 0.687 | 0.636 | 0.244 | 0.820 | 0.260 |
| <i>chr 19</i> | 597668   | 10422797 | 346763   | 421 | 0.819 | 0.300 | 0.178 | 0.597 | 0.679 |
| <i>chr 19</i> | 597668   | 10422797 | 346763   | 243 | 0.786 | 0.104 | 0.640 | 0.464 | 0.157 |
| <i>chr 19</i> | 597668   | 10422797 | 346763   | 443 | 0.943 | 0.317 | 0.506 | 0.460 | 0.204 |
| <i>chr 19</i> | 10422797 | 346763   | 17356664 | 434 | 0.933 | 0.154 | 0.948 | 0.576 | 0.372 |
| <i>chr 19</i> | 10422797 | 346763   | 17356664 | 212 | 0.869 | 0.345 | 0.098 | 0.884 | 0.562 |
| <i>chr 19</i> | 10422797 | 346763   | 17356664 | 432 | 0.944 | 0.357 | 0.318 | 0.631 | 0.418 |
| <i>chr 19</i> | 346763   | 17356664 | 10445572 | 343 | 0.848 | 0.435 | 0.596 | 0.385 | 0.052 |
| <i>chr 19</i> | 346763   | 17356664 | 10445572 | 323 | 0.636 | 0.981 | 0.362 | 0.924 | 0.481 |
| <i>chr 19</i> | 346763   | 17356664 | 10445572 | 341 | 0.993 | 0.228 | 0.870 | 0.289 | 0.932 |
| <i>chr 19</i> | 346763   | 17356664 | 10445572 | 121 | 0.889 | 0.228 | 0.044 | 0.969 | 0.923 |
| <i>chr 19</i> | 346763   | 17356664 | 10445572 | 321 | 0.561 | 0.289 | 0.854 | 0.654 | 0.088 |
| <i>chr 19</i> | 17356664 | 10445572 | 2240672  | 431 | 0.489 | 0.974 | 0.797 | 0.419 | 0.091 |
| <i>chr 19</i> | 17356664 | 10445572 | 2240672  | 411 | 0.566 | 0.467 | 0.978 | 0.579 | 0.726 |
| <i>chr 19</i> | 17356664 | 10445572 | 2240672  | 211 | 0.779 | 0.193 | 0.319 | 0.684 | 0.571 |
| <i>chr 19</i> | 17356664 | 10445572 | 2240672  | 433 | 0.729 | 0.211 | 0.396 | 0.722 | 0.691 |
| <i>chr 19</i> | 17356664 | 10445572 | 2240672  | 233 | 0.581 | 0.895 | 0.212 | 0.470 | 0.534 |
| <i>chr 19</i> | 17356664 | 10445572 | 2240672  | 413 | 0.879 | 0.305 | 0.770 | 0.450 | 0.956 |
| <i>chr 19</i> | 17356664 | 10445572 | 2240672  | 213 | 0.934 | 0.677 | 0.805 | 0.961 | 0.040 |
| <i>chr 19</i> | 10445572 | 2240672  | 345409   | 312 | 0.336 | 0.718 | 0.133 | 0.948 | 0.268 |
| <i>chr 19</i> | 10445572 | 2240672  | 345409   | 112 | 0.475 | 0.312 | 0.337 | 0.891 | 0.914 |
| <i>chr 19</i> | 10445572 | 2240672  | 345409   | 332 | 0.009 | 0.418 | 0.436 | 0.899 | 0.992 |
| <i>chr 19</i> | 10445572 | 2240672  | 345409   | 132 | 0.956 | 0.714 | 0.679 | 0.995 | 0.053 |
| <i>chr 19</i> | 10445572 | 2240672  | 345409   | 334 | 0.623 | 0.737 | 0.370 | 0.595 | 0.265 |
| <i>chr 19</i> | 10445572 | 2240672  | 345409   | 134 | 0.804 | 0.341 | 0.914 | 0.507 | 0.584 |
| <i>chr 19</i> | 2240672  | 345409   | 11883302 | 122 | 0.771 | 0.211 | 0.594 | 0.956 | 0.395 |

|        |          |          |           |     |       |       |       |       |       |
|--------|----------|----------|-----------|-----|-------|-------|-------|-------|-------|
| chr 19 | 2240672  | 345409   | 11883302  | 322 | 0.272 | 0.967 | 0.504 | 0.953 | 0.114 |
| chr 19 | 2240672  | 345409   | 11883302  | 124 | 0.948 | 0.917 | 0.099 | 0.864 | 0.064 |
| chr 19 | 2240672  | 345409   | 11883302  | 344 | 0.611 | 0.277 | 0.394 | 0.826 | 0.450 |
| chr 19 | 345409   | 11883302 | 344807    | 224 | 0.816 | 0.425 | 0.542 | 0.529 | 0.564 |
| chr 19 | 345409   | 11883302 | 344807    | 444 | 0.356 | 0.898 | 0.241 | 0.484 | 0.246 |
| chr 19 | 345409   | 11883302 | 344807    | 222 | 0.628 | 0.317 | 0.828 | 0.900 | 0.084 |
| chr 19 | 345409   | 11883302 | 344807    | 242 | 0.912 | 0.974 | 0.092 | 0.960 | 0.110 |
| chr 19 | 345409   | 11883302 | 344807    | 442 | 0.750 | 0.245 | 0.801 | 0.301 | 0.692 |
| chr 19 | 11883302 | 344807   | 2306660   | 222 | 0.649 | 0.178 | 0.540 | 0.929 | 0.308 |
| chr 19 | 11883302 | 344807   | 2306660   | 422 | 0.434 | 0.605 | 0.118 | 0.135 | 0.239 |
| chr 19 | 11883302 | 344807   | 2306660   | 244 | 0.902 | 0.681 | 0.482 | 0.525 | 0.697 |
| chr 19 | 11883302 | 344807   | 2306660   | 444 | 0.334 | 0.900 | 0.254 | 0.414 | 0.203 |
| chr 19 | 11883302 | 344807   | 2306660   | 224 | 0.082 | 0.776 | 0.475 | 0.788 | 0.126 |
| chr 19 | 11883302 | 344807   | 2306660   | 424 | 0.558 | 0.315 | 0.529 | 0.614 | 0.882 |
| chr 19 | 344807   | 2306660  | 8111989   | 242 | 0.903 | 0.326 | 0.565 | 0.350 | 0.500 |
| chr 19 | 344807   | 2306660  | 8111989   | 224 | 0.468 | 0.281 | 0.231 | 0.503 | 0.611 |
| chr 19 | 344807   | 2306660  | 8111989   | 444 | 0.447 | 0.988 | 0.149 | 0.292 | 0.232 |
| chr 19 | 344807   | 2306660  | 8111989   | 244 | 0.049 | 0.791 | 0.642 | 0.444 | 0.930 |
| chr 19 | 2306660  | 8111989  | 7260463   | 424 | 0.903 | 0.312 | 0.515 | 0.654 | 0.558 |
| chr 19 | 2306660  | 8111989  | 7260463   | 244 | 0.511 | 0.083 | 0.226 | 0.564 | 0.159 |
| chr 19 | 2306660  | 8111989  | 7260463   | 423 | 0.609 | 0.420 | 0.642 | 0.030 | 0.624 |
| chr 19 | 2306660  | 8111989  | 7260463   | 243 | 0.626 | 0.692 | 0.453 | 0.651 | 0.959 |
| chr 19 | 2306660  | 8111989  | 7260463   | 443 | 0.574 | 0.824 | 0.098 | 0.134 | 0.291 |
| APP    | 2829961  | 3787620  | 373521    | 411 | 0.581 | 0.484 | 0.408 | 0.588 | 0.544 |
| APP    | 2829961  | 3787620  | 373521    | 222 | 0.881 | 0.394 | 0.751 | 0.608 | 0.779 |
| APP    | 2829961  | 3787620  | 373521    | 212 | 0.945 | 0.836 | 0.140 | 0.412 | 0.951 |
| APP    | 2829961  | 3787620  | 373521    | 412 | 0.595 | 0.488 | 0.598 | 0.900 | 0.606 |
| APP    | 3787620  | 373521   | 2829973   | 123 | 0.804 | 0.661 | 0.078 | 0.615 | 0.663 |
| APP    | 3787620  | 373521   | 2829973   | 111 | 0.636 | 0.415 | 0.375 | 0.655 | 0.553 |
| APP    | 3787620  | 373521   | 2829973   | 221 | 0.885 | 0.381 | 0.756 | 0.582 | 0.761 |
| APP    | 3787620  | 373521   | 2829973   | 121 | 0.219 | 0.745 | 0.243 | 0.521 | 0.975 |
| APP    | 373521   | 2829973  | 1783025   | 212 | 0.450 | 0.575 | 0.325 | 0.958 | 0.760 |
| APP    | 373521   | 2829973  | 1783025   | 234 | 0.859 | 0.728 | 0.096 | 0.682 | 0.699 |
| APP    | 373521   | 2829973  | 1783025   | 114 | 0.630 | 0.445 | 0.383 | 0.601 | 0.586 |
| APP    | 2829973  | 1783025  | 380417    | 124 | 0.024 | 0.081 | 0.007 | 0.921 | 0.322 |
| APP    | 2829973  | 1783025  | 380417    | 344 | 0.265 | 0.096 | 0.125 | 0.672 | 0.147 |
| APP    | 2829973  | 1783025  | 380417    | 144 | 0.937 | 0.276 | 0.346 | 0.752 | 0.031 |
| APP    | 2829973  | 1783025  | 380417    | 122 | 0.116 | 0.003 | 0.099 | 0.964 | 0.081 |
| APP    | 2829973  | 1783025  | 380417    | 342 | 0.641 | 0.416 | 0.033 | 0.763 | 0.413 |
| APP    | 2829973  | 1783025  | 380417    | 142 | 0.728 | 0.688 | 0.596 | 0.575 | 0.797 |
| APP    | 1783025  | 380417   | 1787438   | 244 | 0.092 | 0.114 | 0.097 | 0.662 | 0.431 |
| APP    | 1783025  | 380417   | 1787438   | 444 | 0.525 | 0.629 | 0.846 | 0.510 | 0.462 |
| APP    | 1783025  | 380417   | 1787438   | 243 | 0.116 | 0.325 | 0.028 | 0.684 | 0.449 |
| APP    | 1783025  | 380417   | 1787438 * | 443 | 0.231 | 0.085 | 0.071 | 0.305 | 0.000 |
| APP    | 1783025  | 380417   | 1787438   | 223 | 0.082 | 0.002 | 0.072 | 0.975 | 0.075 |
| APP    | 1783025  | 380417   | 1787438   | 423 | 0.395 | 0.672 | 0.093 | 0.759 | 0.245 |
| APP    | 380417   | 1787438  | 17001492  | 432 | 0.236 | 0.058 | 0.055 | 0.736 | 0.001 |
| APP    | 380417   | 1787438  | 17001492  | 232 | 0.717 | 0.582 | 0.940 | 0.863 | 0.401 |
| APP    | 380417   | 1787438  | 17001492  | 441 | 0.275 | 0.084 | 0.107 | 0.977 | 0.755 |
| APP    | 380417   | 1787438  | 17001492  | 431 | 0.137 | 0.635 | 0.059 | 0.779 | 0.404 |
| APP    | 380417   | 1787438  | 17001492  | 231 | 0.032 | 0.020 | 0.002 | 0.729 | 0.029 |
| APP    | 1787438  | 17001492 | 1783016   | 414 | 0.654 | 0.027 | 0.006 | 0.356 | 0.580 |

|            |                          |     |       |       |       |       |       |
|------------|--------------------------|-----|-------|-------|-------|-------|-------|
| <b>APP</b> | 1787438 17001492 1783016 | 314 | 0.985 | 0.618 | 0.500 | 0.393 | 0.808 |
| <b>APP</b> | 1787438 17001492 1783016 | 322 | 0.269 | 0.133 | 0.075 | 0.830 | 0.009 |
| <b>APP</b> | 1787438 17001492 1783016 | 412 | 0.375 | 0.434 | 0.754 | 0.766 | 0.939 |
| <b>APP</b> | 1787438 17001492 1783016 | 312 | 0.212 | 0.026 | 0.015 | 0.425 | 0.178 |
| <b>APP</b> | 17001492 1783016 396969  | 121 | 0.151 | 0.111 | 0.281 | 0.745 | 0.461 |
| <b>APP</b> | 17001492 1783016 396969  | 143 | 0.880 | 0.261 | 0.150 | 0.606 | 0.951 |
| <b>APP</b> | 17001492 1783016 396969  | 223 | 0.257 | 0.163 | 0.090 | 0.758 | 0.011 |
| <b>APP</b> | 17001492 1783016 396969  | 123 | 0.119 | 0.009 | 0.006 | 0.430 | 0.082 |
| <b>APP</b> | 1783016 396969 214488    | 212 | 0.151 | 0.111 | 0.281 | 0.745 | 0.461 |
| <b>APP</b> | 1783016 396969 214488    | 232 | 0.054 | 0.154 | 0.011 | 0.522 | 0.005 |
| <b>APP</b> | 1783016 396969 214488    | 434 | 0.880 | 0.261 | 0.150 | 0.606 | 0.951 |
| <b>APP</b> | 1783016 396969 214488    | 234 | 0.037 | 0.007 | 0.001 | 0.317 | 0.039 |
| <b>APP</b> | 396969 214488 383700     | 121 | 0.151 | 0.111 | 0.281 | 0.745 | 0.461 |
| <b>APP</b> | 396969 214488 383700     | 323 | 0.054 | 0.155 | 0.011 | 0.527 | 0.005 |
| <b>APP</b> | 396969 214488 383700     | 343 | 0.014 | 0.028 | 0.007 | 0.481 | 0.009 |
| <b>APP</b> | 214488 383700 2829984    | 234 | 0.096 | 0.209 | 0.026 | 0.519 | 0.010 |
| <b>APP</b> | 214488 383700 2829984    | 212 | 0.151 | 0.111 | 0.281 | 0.745 | 0.461 |
| <b>APP</b> | 214488 383700 2829984    | 432 | 0.016 | 0.027 | 0.008 | 0.648 | 0.012 |
| <b>APP</b> | 383700 2829984 2234983   | 321 | 0.446 | 0.286 | 0.498 | 0.399 | 0.107 |
| <b>APP</b> | 383700 2829984 2234983   | 343 | 0.115 | 0.203 | 0.029 | 0.744 | 0.015 |
| <b>APP</b> | 383700 2829984 2234983   | 123 | 0.151 | 0.111 | 0.281 | 0.745 | 0.461 |
| <b>APP</b> | 383700 2829984 2234983   | 323 | 0.012 | 0.344 | 0.130 | 0.283 | 0.461 |
| <b>APP</b> | 2829984 2234983 216779   | 432 | 0.246 | 0.728 | 0.189 | 0.838 | 0.231 |
| <b>APP</b> | 2829984 2234983 216779   | 232 | 0.621 | 0.526 | 0.021 | 0.622 | 0.435 |
| <b>APP</b> | 2829984 2234983 216779   | 211 | 0.446 | 0.286 | 0.498 | 0.399 | 0.107 |
| <b>APP</b> | 2829984 2234983 216779   | 431 | 0.290 | 0.213 | 0.094 | 0.807 | 0.042 |
| <b>APP</b> | 2829984 2234983 216779   | 231 | 0.061 | 0.839 | 0.087 | 0.271 | 0.561 |
| <b>APP</b> | 2234983 216779 400603    | 313 | 0.064 | 0.102 | 0.185 | 0.564 | 0.167 |
| <b>APP</b> | 2234983 216779 400603    | 321 | 0.299 | 0.578 | 0.020 | 0.708 | 0.182 |
| <b>APP</b> | 2234983 216779 400603    | 111 | 0.446 | 0.286 | 0.498 | 0.399 | 0.107 |
| <b>APP</b> | 2234983 216779 400603    | 311 | 0.020 | 0.690 | 0.143 | 0.199 | 0.862 |
| <b>APP</b> | 216779 400603 2829997    | 133 | 0.053 | 0.088 | 0.144 | 0.506 | 0.158 |
| <b>APP</b> | 216779 400603 2829997    | 213 | 0.249 | 0.492 | 0.015 | 0.610 | 0.166 |
| <b>APP</b> | 216779 400603 2829997    | 113 | 0.447 | 0.276 | 0.494 | 0.417 | 0.102 |
| <b>APP</b> | 216779 400603 2829997    | 111 | 0.018 | 0.648 | 0.125 | 0.188 | 0.836 |
| <b>APP</b> | 400603 2829997 440666    | 334 | 0.053 | 0.088 | 0.144 | 0.506 | 0.158 |
| <b>APP</b> | 400603 2829997 440666    | 134 | 0.446 | 0.286 | 0.498 | 0.399 | 0.107 |
| <b>APP</b> | 400603 2829997 440666    | 132 | 0.252 | 0.512 | 0.015 | 0.646 | 0.175 |
| <b>APP</b> | 400603 2829997 440666    | 112 | 0.018 | 0.648 | 0.125 | 0.188 | 0.836 |
| <b>APP</b> | 2829997 440666 2014146 * | 343 | 0.502 | 0.619 | 0.382 | 0.330 | 0.000 |
| <b>APP</b> | 2829997 440666 2014146   | 323 | 0.951 | 0.569 | 0.023 | 0.893 | 0.689 |
| <b>APP</b> | 2829997 440666 2014146   | 123 | 0.276 | 0.984 | 0.460 | 0.565 | 0.369 |
| <b>APP</b> | 2829997 440666 2014146   | 341 | 0.074 | 0.989 | 0.943 | 0.349 | 0.706 |
| <b>APP</b> | 2829997 440666 2014146   | 321 | 0.146 | 0.658 | 0.124 | 0.610 | 0.133 |
| <b>APP</b> | 2829997 440666 2014146   | 121 | 0.208 | 0.659 | 0.446 | 0.474 | 0.454 |
| <b>APP</b> | 440666 2014146 216762    | 412 | 0.087 | 0.083 | 0.077 | 0.357 | 0.060 |
| <b>APP</b> | 440666 2014146 216762    | 212 | 0.543 | 0.837 | 0.924 | 0.627 | 0.165 |
| <b>APP</b> | 440666 2014146 216762    | 434 | 0.418 | 0.474 | 0.283 | 0.294 | 0.001 |
| <b>APP</b> | 440666 2014146 216762    | 234 | 0.283 | 0.930 | 0.868 | 0.591 | 0.421 |
| <b>APP</b> | 440666 2014146 216762    | 414 | 0.665 | 0.035 | 0.042 | 0.840 | 0.085 |
| <b>APP</b> | 2014146 216762 2070657   | 123 | 0.573 | 0.346 | 0.546 | 0.977 | 0.204 |
| <b>APP</b> | 2014146 216762 2070657   | 121 | 0.829 | 0.780 | 0.486 | 0.823 | 0.093 |

|            |         |         |         |     |       |       |       |       |       |
|------------|---------|---------|---------|-----|-------|-------|-------|-------|-------|
| <b>APP</b> | 2014146 | 216762  | 2070657 | 341 | 0.352 | 0.863 | 0.940 | 0.691 | 0.121 |
| <b>APP</b> | 2014146 | 216762  | 2070657 | 141 | 0.665 | 0.035 | 0.042 | 0.840 | 0.085 |
| <b>APP</b> | 216762  | 2070657 | 7276036 | 231 | 0.580 | 0.387 | 0.494 | 0.944 | 0.229 |
| <b>APP</b> | 216762  | 2070657 | 7276036 | 211 | 0.872 | 0.606 | 0.619 | 0.657 | 0.594 |
| <b>APP</b> | 216762  | 2070657 | 7276036 | 411 | 0.912 | 0.595 | 0.198 | 0.663 | 0.959 |
| <b>APP</b> | 216762  | 2070657 | 7276036 | 213 | 0.850 | 0.696 | 0.540 | 0.749 | 0.068 |
| <b>APP</b> | 216762  | 2070657 | 7276036 | 413 | 0.473 | 0.231 | 0.116 | 0.863 | 0.010 |
| <b>APP</b> | 2070657 | 7276036 | 2830000 | 311 | 0.544 | 0.345 | 0.387 | 0.953 | 0.212 |
| <b>APP</b> | 2070657 | 7276036 | 2830000 | 111 | 0.874 | 0.900 | 0.237 | 0.583 | 0.755 |
| <b>APP</b> | 2070657 | 7276036 | 2830000 | 132 | 0.507 | 0.298 | 0.207 | 0.887 | 0.256 |
| <b>APP</b> | 7276036 | 2830000 | 2830001 | 111 | 0.874 | 0.900 | 0.237 | 0.583 | 0.755 |
| <b>APP</b> | 7276036 | 2830000 | 2830001 | 113 | 0.544 | 0.345 | 0.387 | 0.953 | 0.212 |
| <b>APP</b> | 7276036 | 2830000 | 2830001 | 323 | 0.514 | 0.334 | 0.181 | 0.856 | 0.285 |
| <b>APP</b> | 2830000 | 2830001 | 7278838 | 111 | 0.725 | 0.890 | 0.293 | 0.918 | 0.902 |
| <b>APP</b> | 2830000 | 2830001 | 7278838 | 131 | 0.355 | 0.564 | 0.698 | 0.419 | 0.092 |
| <b>APP</b> | 2830000 | 2830001 | 7278838 | 231 | 0.345 | 0.607 | 0.486 | 0.805 | 0.577 |
| <b>APP</b> | 2830000 | 2830001 | 7278838 | 132 | 0.060 | 0.041 | 0.085 | 0.333 | 0.996 |
| <b>APP</b> | 2830000 | 2830001 | 7278838 | 232 | 0.232 | 0.226 | 0.096 | 0.987 | 0.183 |
| <b>APP</b> | 2830001 | 7278838 | 2830008 | 312 | 0.967 | 0.881 | 0.793 | 0.800 | 0.166 |
| <b>APP</b> | 2830001 | 7278838 | 2830008 | 322 | 0.294 | 0.089 | 0.164 | 0.458 | 0.446 |
| <b>APP</b> | 2830001 | 7278838 | 2830008 | 114 | 0.739 | 0.700 | 0.232 | 0.740 | 0.664 |
| <b>APP</b> | 2830001 | 7278838 | 2830008 | 314 | 0.889 | 0.274 | 0.607 | 0.386 | 0.321 |
| <b>APP</b> | 2830001 | 7278838 | 2830008 | 324 | 0.753 | 0.574 | 0.824 | 0.368 | 0.234 |
| <b>APP</b> | 7278838 | 2830008 | 2830012 | 121 | 0.823 | 0.771 | 0.890 | 0.686 | 0.292 |
| <b>APP</b> | 7278838 | 2830008 | 2830012 | 221 | 0.316 | 0.108 | 0.200 | 0.497 | 0.436 |
| <b>APP</b> | 7278838 | 2830008 | 2830012 | 141 | 0.897 | 0.816 | 0.374 | 0.938 | 0.785 |
| <b>APP</b> | 7278838 | 2830008 | 2830012 | 241 | 0.924 | 0.637 | 0.360 | 0.892 | 0.768 |
| <b>APP</b> | 7278838 | 2830008 | 2830012 | 123 | 0.482 | 0.212 | 0.191 | 0.989 | 0.109 |
| <b>APP</b> | 7278838 | 2830008 | 2830012 | 243 | 0.886 | 0.831 | 0.502 | 0.490 | 0.271 |
| <b>APP</b> | 2830008 | 2830012 | 2226330 | 411 | 0.725 | 0.602 | 0.261 | 0.764 | 0.491 |
| <b>APP</b> | 2830008 | 2830012 | 2226330 | 212 | 0.623 | 0.454 | 0.617 | 0.568 | 0.406 |
| <b>APP</b> | 2830008 | 2830012 | 2226330 | 412 | 0.861 | 0.933 | 0.461 | 0.746 | 0.318 |
| <b>APP</b> | 2830008 | 2830012 | 2226330 | 232 | 0.557 | 0.231 | 0.209 | 0.940 | 0.137 |
| <b>APP</b> | 2830008 | 2830012 | 2226330 | 432 | 0.752 | 0.828 | 0.496 | 0.537 | 0.374 |
| <b>APP</b> | 2830012 | 2226330 | 2830017 | 114 | 0.725 | 0.602 | 0.261 | 0.764 | 0.491 |
| <b>APP</b> | 2830012 | 2226330 | 2830017 | 122 | 0.712 | 0.435 | 0.957 | 0.437 | 0.828 |
| <b>APP</b> | 2830012 | 2226330 | 2830017 | 322 | 0.617 | 0.552 | 0.733 | 0.502 | 0.638 |
| <b>APP</b> | 2226330 | 2830017 | 2830018 | 143 | 0.725 | 0.602 | 0.261 | 0.764 | 0.491 |
| <b>APP</b> | 2226330 | 2830017 | 2830018 | 221 | 0.725 | 0.602 | 0.261 | 0.764 | 0.491 |
| <b>APP</b> | 2830017 | 2830018 | 768039  | 214 | 0.998 | 0.442 | 0.360 | 0.590 | 0.394 |
| <b>APP</b> | 2830017 | 2830018 | 768039  | 432 | 0.725 | 0.602 | 0.261 | 0.764 | 0.491 |
| <b>APP</b> | 2830017 | 2830018 | 768039  | 212 | 0.908 | 0.353 | 0.206 | 0.530 | 0.551 |
| <b>APP</b> | 2830018 | 768039  | 2830028 | 324 | 0.927 | 0.453 | 0.312 | 0.570 | 0.193 |
| <b>APP</b> | 2830018 | 768039  | 2830028 | 124 | 0.334 | 0.022 | 0.098 | 0.975 | 0.285 |
| <b>APP</b> | 2830018 | 768039  | 2830028 | 143 | 0.998 | 0.442 | 0.360 | 0.590 | 0.394 |
| <b>APP</b> | 2830018 | 768039  | 2830028 | 123 | 0.334 | 0.231 | 0.741 | 0.585 | 0.132 |
| <b>APP</b> | 768039  | 2830028 | 3991    | 434 | 0.646 | 0.902 | 0.315 | 0.123 | 0.602 |
| <b>APP</b> | 768039  | 2830028 | 3991    | 234 | 0.460 | 0.642 | 0.335 | 0.055 | 0.583 |
| <b>APP</b> | 768039  | 2830028 | 3991    | 243 | 0.334 | 0.041 | 0.173 | 0.943 | 0.484 |
| <b>APP</b> | 768039  | 2830028 | 3991    | 433 | 0.853 | 0.374 | 0.561 | 0.221 | 0.477 |
| <b>APP</b> | 768039  | 2830028 | 3991    | 233 | 0.115 | 0.361 | 0.196 | 0.310 | 0.288 |
| <b>APP</b> | 2830028 | 3991    | 2830033 | 344 | 0.627 | 0.713 | 0.637 | 0.020 | 0.773 |

|            |                           |     |       |       |       |       |       |
|------------|---------------------------|-----|-------|-------|-------|-------|-------|
| <b>APP</b> | 2830028 3991 2830033      | 334 | 0.136 | 0.623 | 0.474 | 0.921 | 0.120 |
| <b>APP</b> | 2830028 3991 2830033      | 432 | 0.342 | 0.046 | 0.178 | 0.868 | 0.477 |
| <b>APP</b> | 2830028 3991 2830033      | 332 | 0.613 | 0.225 | 0.224 | 0.088 | 0.711 |
| <b>APP</b> | 3991 2830033 2830036      | 324 | 0.051 | 0.006 | 0.128 | 0.387 | 0.316 |
| <b>APP</b> | 3991 2830033 2830036      | 442 | 0.627 | 0.713 | 0.637 | 0.020 | 0.773 |
| <b>APP</b> | 3991 2830033 2830036      | 342 | 0.136 | 0.623 | 0.474 | 0.921 | 0.120 |
| <b>APP</b> | 3991 2830033 2830036      | 322 | 0.228 | 0.107 | 0.221 | 0.010 | 0.829 |
| <b>APP</b> | 2830033 2830036 2830038   | 243 | 0.051 | 0.006 | 0.128 | 0.387 | 0.316 |
| <b>APP</b> | 2830033 2830036 2830038   | 223 | 0.280 | 0.706 | 0.915 | 0.214 | 0.960 |
| <b>APP</b> | 2830033 2830036 2830038   | 421 | 0.728 | 0.557 | 0.967 | 0.044 | 0.281 |
| <b>APP</b> | 2830033 2830036 2830038   | 221 | 0.629 | 0.150 | 0.220 | 0.069 | 0.790 |
| <b>APP</b> | 2830036 2830038 7283136   | 232 | 0.539 | 0.880 | 0.642 | 0.266 | 0.844 |
| <b>APP</b> | 2830036 2830038 7283136   | 434 | 0.051 | 0.006 | 0.128 | 0.387 | 0.316 |
| <b>APP</b> | 2830036 2830038 7283136   | 234 | 0.364 | 0.478 | 0.507 | 0.554 | 0.774 |
| <b>APP</b> | 2830036 2830038 7283136   | 214 | 0.407 | 0.044 | 0.235 | 0.857 | 0.421 |
| <b>APP</b> | 2830038 7283136 2830040   | 144 | 0.632 | 0.605 | 0.558 | 0.918 | 0.182 |
| <b>APP</b> | 2830038 7283136 2830040   | 322 | 0.539 | 0.880 | 0.642 | 0.266 | 0.844 |
| <b>APP</b> | 2830038 7283136 2830040   | 342 | 0.191 | 0.031 | 0.297 | 0.633 | 0.437 |
| <b>APP</b> | 2830038 7283136 2830040   | 142 | 0.300 | 0.098 | 0.408 | 0.822 | 0.933 |
| <b>APP</b> | 7283136 2830040 731523    | 224 | 0.429 | 0.911 | 0.907 | 0.954 | 0.464 |
| <b>APP</b> | 7283136 2830040 731523    | 442 | 0.635 | 0.596 | 0.560 | 0.899 | 0.181 |
| <b>APP</b> | 7283136 2830040 731523    | 222 | 0.268 | 0.819 | 0.557 | 0.202 | 0.837 |
| <b>APP</b> | 7283136 2830040 731523    | 422 | 0.922 | 0.780 | 0.936 | 0.352 | 0.401 |
| <b>APP</b> | 2830040 731523 2830044    | 422 | 0.633 | 0.602 | 0.558 | 0.911 | 0.181 |
| <b>APP</b> | 2830040 731523 2830044    | 222 | 0.566 | 0.274 | 0.513 | 0.064 | 0.271 |
| <b>APP</b> | 2830040 731523 2830044    | 244 | 0.429 | 0.911 | 0.907 | 0.954 | 0.464 |
| <b>APP</b> | 2830040 731523 2830044    | 224 | 0.935 | 0.175 | 0.334 | 0.071 | 0.584 |
| <b>APP</b> | 731523 2830044 2830051    | 442 | 0.429 | 0.911 | 0.907 | 0.954 | 0.464 |
| <b>APP</b> | 731523 2830044 2830051    | 242 | 0.381 | 0.373 | 0.775 | 0.575 | 0.634 |
| <b>APP</b> | 731523 2830044 2830051    | 224 | 0.823 | 0.131 | 0.282 | 0.069 | 0.712 |
| <b>APP</b> | 731523 2830044 2830051    | 244 | 0.449 | 0.503 | 0.235 | 0.025 | 0.853 |
| <b>APP</b> | 2830044 2830051 2830052   | 242 | 0.360 | 0.359 | 0.218 | 0.082 | 0.677 |
| <b>APP</b> | 2830044 2830051 2830052   | 442 | 0.744 | 0.207 | 0.883 | 0.036 | 0.400 |
| <b>APP</b> | 2830044 2830051 2830052   | 424 | 0.620 | 0.391 | 0.776 | 0.660 | 0.873 |
| <b>APP</b> | 2830044 2830051 2830052   | 244 | 0.971 | 0.198 | 0.437 | 0.171 | 0.620 |
| <b>APP</b> | 2830044 2830051 2830052   | 444 | 0.228 | 0.030 | 0.191 | 0.614 | 0.531 |
| <b>APP</b> | 2830051 2830052 11702267  | 424 | 0.331 | 0.945 | 0.753 | 0.210 | 0.313 |
| <b>APP</b> | 2830051 2830052 11702267  | 422 | 0.221 | 0.096 | 0.697 | 0.338 | 0.091 |
| <b>APP</b> | 2830051 2830052 11702267  | 242 | 0.510 | 0.318 | 0.869 | 0.570 | 0.827 |
| <b>APP</b> | 2830051 2830052 11702267  | 442 | 0.301 | 0.588 | 0.781 | 0.405 | 0.284 |
| <b>APP</b> | 2830052 11702267 2830054  | 243 | 0.333 | 0.936 | 0.746 | 0.220 | 0.312 |
| <b>APP</b> | 2830052 11702267 2830054  | 223 | 0.347 | 0.171 | 0.967 | 0.198 | 0.076 |
| <b>APP</b> | 2830052 11702267 2830054  | 423 | 0.582 | 0.466 | 0.800 | 0.272 | 0.777 |
| <b>APP</b> | 2830052 11702267 2830054  | 224 | 0.217 | 0.164 | 0.144 | 0.248 | 0.882 |
| <b>APP</b> | 2830052 11702267 2830054  | 424 | 0.369 | 0.375 | 0.990 | 0.555 | 0.261 |
| <b>APP</b> | 11702267 2830054 12482262 | 233 | 0.284 | 0.945 | 0.159 | 0.244 | 0.258 |
| <b>APP</b> | 11702267 2830054 12482262 | 431 | 0.407 | 0.914 | 0.773 | 0.292 | 0.446 |
| <b>APP</b> | 11702267 2830054 12482262 | 231 | 0.452 | 0.510 | 0.436 | 0.421 | 0.217 |
| <b>APP</b> | 11702267 2830054 12482262 | 241 | 0.514 | 0.537 | 0.769 | 0.416 | 0.250 |
| <b>APP</b> | 2830054 12482262 2256331  | 333 | 0.357 | 0.917 | 0.517 | 0.584 | 0.256 |
| <b>APP</b> | 2830054 12482262 2256331  | 313 | 0.814 | 0.500 | 0.374 | 0.179 | 0.468 |
| <b>APP</b> | 2830054 12482262 2256331  | 413 | 0.740 | 0.623 | 0.986 | 0.291 | 0.693 |

|            |          |          |          |     |       |       |       |       |       |
|------------|----------|----------|----------|-----|-------|-------|-------|-------|-------|
| <b>APP</b> | 2830054  | 12482262 | 2256331  | 334 | 0.587 | 0.980 | 0.128 | 0.228 | 0.716 |
| <b>APP</b> | 2830054  | 12482262 | 2256331  | 414 | 0.404 | 0.753 | 0.765 | 0.865 | 0.369 |
| <b>APP</b> | 12482262 | 2256331  | 3827166  | 133 | 0.961 | 0.369 | 0.898 | 0.656 | 0.633 |
| <b>APP</b> | 12482262 | 2256331  | 3827166  | 334 | 0.287 | 0.842 | 0.349 | 0.379 | 0.120 |
| <b>APP</b> | 12482262 | 2256331  | 3827166  | 134 | 0.721 | 0.415 | 0.351 | 0.282 | 0.542 |
| <b>APP</b> | 12482262 | 2256331  | 3827166  | 344 | 0.725 | 0.630 | 0.175 | 0.379 | 0.732 |
| <b>APP</b> | 12482262 | 2256331  | 3827166  | 144 | 0.432 | 0.828 | 0.684 | 0.771 | 0.452 |
| <b>APP</b> | 2256331  | 3827166  | 2830058  | 332 | 0.961 | 0.369 | 0.898 | 0.656 | 0.633 |
| <b>APP</b> | 2256331  | 3827166  | 2830058  | 344 | 0.484 | 0.393 | 0.562 | 0.461 | 0.264 |
| <b>APP</b> | 2256331  | 3827166  | 2830058  | 444 | 0.481 | 0.758 | 0.522 | 0.647 | 0.419 |
| <b>APP</b> | 3827166  | 2830058  | 2830068  | 444 | 0.631 | 0.310 | 0.524 | 0.432 | 0.626 |
| <b>APP</b> | 3827166  | 2830058  | 2830068  | 322 | 0.961 | 0.369 | 0.898 | 0.656 | 0.633 |
| <b>APP</b> | 3827166  | 2830058  | 2830068  | 442 | 0.621 | 0.659 | 0.486 | 0.621 | 0.854 |
| <b>APP</b> | 2830058  | 2830068  | 2830076  | 444 | 0.670 | 0.340 | 0.550 | 0.530 | 0.663 |
| <b>APP</b> | 2830058  | 2830068  | 2830076  | 424 | 0.987 | 0.920 | 0.252 | 0.338 | 0.518 |
| <b>APP</b> | 2830058  | 2830068  | 2830076  | 222 | 0.986 | 0.344 | 0.869 | 0.657 | 0.655 |
| <b>APP</b> | 2830058  | 2830068  | 2830076  | 422 | 0.622 | 0.744 | 0.708 | 0.768 | 0.719 |
| <b>APP</b> | 2830068  | 2830076  | 2830079  | 223 | 0.649 | 0.373 | 0.872 | 0.515 | 0.894 |
| <b>APP</b> | 2830068  | 2830076  | 2830079  | 441 | 0.681 | 0.330 | 0.538 | 0.557 | 0.651 |
| <b>APP</b> | 2830068  | 2830076  | 2830079  | 241 | 0.987 | 0.920 | 0.253 | 0.337 | 0.518 |
| <b>APP</b> | 2830068  | 2830076  | 2830079  | 221 | 0.455 | 0.768 | 0.858 | 0.940 | 0.479 |
| <b>APP</b> | 2830076  | 2830079  | 466609   | 213 | 0.699 | 0.626 | 0.943 | 0.347 | 0.927 |
| <b>APP</b> | 2830076  | 2830079  | 466609   | 234 | 0.643 | 0.380 | 0.864 | 0.515 | 0.901 |
| <b>APP</b> | 2830076  | 2830079  | 466609   | 414 | 0.724 | 0.365 | 0.784 | 0.679 | 0.532 |
| <b>APP</b> | 2830076  | 2830079  | 466609   | 214 | 0.381 | 0.986 | 0.918 | 0.529 | 0.531 |
| <b>APP</b> | 2830079  | 466609   | 12482753 | 343 | 0.264 | 0.875 | 0.488 | 0.442 | 0.194 |
| <b>APP</b> | 2830079  | 466609   | 12482753 | 131 | 0.693 | 0.618 | 0.935 | 0.357 | 0.920 |
| <b>APP</b> | 2830079  | 466609   | 12482753 | 341 | 0.942 | 0.286 | 0.859 | 0.751 | 0.580 |
| <b>APP</b> | 2830079  | 466609   | 12482753 | 141 | 0.504 | 0.283 | 0.843 | 0.226 | 0.982 |
| <b>APP</b> | 466609   | 12482753 | 375369   | 431 | 0.242 | 0.800 | 0.486 | 0.409 | 0.174 |
| <b>APP</b> | 466609   | 12482753 | 375369   | 411 | 0.701 | 0.808 | 0.662 | 0.852 | 0.825 |
| <b>APP</b> | 466609   | 12482753 | 375369   | 313 | 0.693 | 0.618 | 0.935 | 0.357 | 0.920 |
| <b>APP</b> | 9 466609 | 12482753 | 375369   | 413 | 0.329 | 0.994 | 0.875 | 0.509 | 0.560 |
| <b>APP</b> | 12482753 | 375369   | 2830088  | 312 | 0.243 | 0.801 | 0.486 | 0.410 | 0.174 |
| <b>APP</b> | 12482753 | 375369   | 2830088  | 112 | 0.820 | 0.818 | 0.462 | 0.700 | 0.861 |
| <b>APP</b> | 12482753 | 375369   | 2830088  | 114 | 0.674 | 0.965 | 0.139 | 0.282 | 0.748 |
| <b>APP</b> | 12482753 | 375369   | 2830088  | 134 | 0.496 | 0.770 | 0.867 | 0.887 | 0.501 |
| <b>APP</b> | 375369   | 2830088  | 17588612 | 122 | 0.554 | 0.431 | 0.987 | 0.891 | 0.183 |
| <b>APP</b> | 375369   | 2830088  | 17588612 | 124 | 0.788 | 0.890 | 0.613 | 0.843 | 0.886 |
| <b>APP</b> | 375369   | 2830088  | 17588612 | 144 | 0.674 | 0.965 | 0.139 | 0.282 | 0.748 |
| <b>APP</b> | 375369   | 2830088  | 17588612 | 344 | 0.496 | 0.770 | 0.867 | 0.887 | 0.501 |
| <b>APP</b> | 2830088  | 17588612 | 10460695 | 241 | 0.936 | 0.371 | 0.821 | 0.728 | 0.656 |
| <b>APP</b> | 2830088  | 17588612 | 10460695 | 223 | 0.532 | 0.399 | 0.993 | 0.847 | 0.175 |
| <b>APP</b> | 2830088  | 17588612 | 10460695 | 243 | 0.752 | 0.695 | 0.685 | 0.642 | 0.907 |
| <b>APP</b> | 2830088  | 17588612 | 10460695 | 443 | 0.559 | 0.761 | 0.618 | 0.908 | 0.549 |
| <b>APP</b> | 17588612 | 10460695 | 2186302  | 232 | 0.518 | 0.376 | 0.994 | 0.828 | 0.167 |
| <b>APP</b> | 17588612 | 10460695 | 2186302  | 432 | 0.965 | 0.684 | 0.498 | 0.461 | 0.751 |
| <b>APP</b> | 17588612 | 10460695 | 2186302  | 414 | 0.936 | 0.371 | 0.821 | 0.728 | 0.656 |
| <b>APP</b> | 17588612 | 10460695 | 2186302  | 434 | 0.781 | 0.739 | 0.460 | 0.742 | 0.814 |
| <b>APP</b> | 10460695 | 2186302  | 13049230 | 323 | 0.729 | 0.362 | 0.610 | 0.692 | 0.592 |
| <b>APP</b> | 10460695 | 2186302  | 13049230 | 141 | 0.936 | 0.371 | 0.821 | 0.728 | 0.656 |
| <b>APP</b> | 10460695 | 2186302  | 13049230 | 341 | 0.781 | 0.739 | 0.460 | 0.742 | 0.814 |

|            |          |          |         |     |       |       |       |       |       |
|------------|----------|----------|---------|-----|-------|-------|-------|-------|-------|
| <b>APP</b> | 2186302  | 13049230 | 370345  | 232 | 0.729 | 0.362 | 0.610 | 0.692 | 0.592 |
| <b>APP</b> | 2186302  | 13049230 | 370345  | 412 | 0.281 | 0.938 | 0.173 | 0.256 | 0.253 |
| <b>APP</b> | 2186302  | 13049230 | 370345  | 414 | 0.453 | 0.409 | 0.954 | 0.942 | 0.341 |
| <b>APP</b> | 13049230 | 370345   | 6516727 | 323 | 0.729 | 0.362 | 0.610 | 0.692 | 0.592 |
| <b>APP</b> | 13049230 | 370345   | 6516727 | 123 | 0.356 | 0.926 | 0.733 | 0.869 | 0.291 |
| <b>APP</b> | 13049230 | 370345   | 6516727 | 121 | 0.654 | 0.969 | 0.152 | 0.289 | 0.737 |
| <b>APP</b> | 13049230 | 370345   | 6516727 | 141 | 0.454 | 0.408 | 0.963 | 0.948 | 0.342 |
| <b>APP</b> | 370345   | 6516727  | 2830104 | 233 | 0.433 | 0.726 | 0.579 | 0.762 | 0.228 |
| <b>APP</b> | 370345   | 6516727  | 2830104 | 413 | 0.833 | 0.301 | 0.831 | 0.516 | 0.529 |
| <b>APP</b> | 370345   | 6516727  | 2830104 | 231 | 0.664 | 0.433 | 0.568 | 0.660 | 0.583 |
| <b>APP</b> | 370345   | 6516727  | 2830104 | 211 | 0.648 | 0.976 | 0.151 | 0.284 | 0.733 |
| <b>APP</b> | 370345   | 6516727  | 2830104 | 411 | 0.514 | 0.778 | 0.869 | 0.769 | 0.529 |
| <b>APP</b> | 6516727  | 2830104  | 462281  | 113 | 0.989 | 0.727 | 0.181 | 0.191 | 0.825 |
| <b>APP</b> | 6516727  | 2830104  | 462281  | 331 | 0.432 | 0.724 | 0.578 | 0.760 | 0.228 |
| <b>APP</b> | 6516727  | 2830104  | 462281  | 131 | 0.832 | 0.300 | 0.830 | 0.516 | 0.528 |
| <b>APP</b> | 6516727  | 2830104  | 462281  | 311 | 0.665 | 0.433 | 0.567 | 0.659 | 0.583 |
| <b>APP</b> | 6516727  | 2830104  | 462281  | 111 | 0.591 | 0.837 | 0.834 | 0.741 | 0.552 |
| <b>APP</b> | 2830104  | 462281   | 466448  | 133 | 0.989 | 0.727 | 0.181 | 0.191 | 0.825 |
| <b>APP</b> | 2830104  | 462281   | 466448  | 313 | 0.845 | 0.481 | 0.941 | 0.492 | 0.976 |
| <b>APP</b> | 2830104  | 462281   | 466448  | 113 | 0.703 | 0.610 | 0.670 | 0.714 | 0.961 |
| <b>APP</b> | 2830104  | 462281   | 466448  | 111 | 0.627 | 0.962 | 0.940 | 0.693 | 0.907 |
| <b>APP</b> | 462281   | 466448   | 438031  | 132 | 0.405 | 0.092 | 0.606 | 0.379 | 0.289 |
| <b>APP</b> | 462281   | 466448   | 438031  | 334 | 0.989 | 0.727 | 0.181 | 0.191 | 0.825 |
| <b>APP</b> | 462281   | 466448   | 438031  | 134 | 0.289 | 0.243 | 0.984 | 0.619 | 0.435 |
| <b>APP</b> | 462281   | 466448   | 438031  | 114 | 0.627 | 0.962 | 0.940 | 0.693 | 0.907 |
| <b>APP</b> | 466448   | 438031   | 2156079 | 341 | 0.343 | 0.357 | 0.934 | 0.635 | 0.413 |
| <b>APP</b> | 466448   | 438031   | 2156079 | 323 | 0.412 | 0.103 | 0.616 | 0.339 | 0.312 |
| <b>APP</b> | 466448   | 438031   | 2156079 | 343 | 0.792 | 0.748 | 0.384 | 0.564 | 0.961 |
| <b>APP</b> | 466448   | 438031   | 2156079 | 143 | 0.627 | 0.962 | 0.940 | 0.693 | 0.907 |

**Table S5. Haplotype analyses of Cognitive Phenotypes in APOE ε4 positive samples from the LBC1936 dataset.** Results shown are p values and were considered significant if  $p < 0.00056$ . \* indicates a p value significant at corrected threshold level  $p \leq 0.00056$ . The following abbreviations are used: GCA11, general cognitive ability at age 11 (MHT adjusted for age); GCA70, general cognitive ability at age 70 (MHT adjusted for age); LM, logical memory; MR, matrix reasoning; VF, verbal fluency.

| Gene | dbSNP ID (rs)             | HAPLOTYPE | GCA11 | GCA70 | VF    | MR    | LM    |
|------|---------------------------|-----------|-------|-------|-------|-------|-------|
| CR1  | 9429940 1571344 2025935   | 244       | 0.655 | 0.332 | 0.070 | 0.510 | 0.411 |
| CR1  | 9429940 1571344 2025935   | 222       | 0.614 | 0.234 | 0.362 | 0.126 | 0.177 |
| CR1  | 9429940 1571344 2025935   | 442       | 0.338 | 0.573 | 0.791 | 0.558 | 0.734 |
| CR1  | 9429940 1571344 2025935   | 242       | 0.907 | 0.193 | 0.033 | 0.471 | 0.880 |
| CR1  | 1571344 2025935 4310446   | 422       | 0.540 | 0.297 | 0.790 | 0.579 | 0.914 |
| CR1  | 1571344 2025935 4310446   | 444       | 0.857 | 0.434 | 0.081 | 0.539 | 0.582 |
| CR1  | 1571344 2025935 4310446   | 224       | 0.681 | 0.251 | 0.355 | 0.120 | 0.170 |
| CR1  | 1571344 2025935 4310446   | 424       | 0.785 | 0.386 | 0.034 | 0.435 | 0.875 |
| CR1  | 2025935 4310446 11117959  | 443       | 0.115 | 0.116 | 0.077 | 0.837 | 0.633 |
| CR1  | 2025935 4310446 11117959  | 243       | 0.893 | 0.680 | 0.597 | 0.340 | 0.407 |
| CR1  | 2025935 4310446 11117959  | 221       | 0.656 | 0.373 | 0.710 | 0.680 | 0.892 |
| CR1  | 2025935 4310446 11117959  | 441       | 0.919 | 0.632 | 0.169 | 0.486 | 0.630 |
| CR1  | 2025935 4310446 11117959  | 241       | 0.975 | 0.898 | 0.227 | 0.346 | 0.867 |
| CR1  | 4310446 11117959 6656401  | 211       | 0.754 | 0.468 | 0.517 | 0.823 | 0.998 |
| CR1  | 4310446 11117959 6656401  | 411       | 0.026 | 0.125 | 0.114 | 0.290 | 0.521 |
| CR1  | 4310446 11117959 6656401  | 233       | 0.120 | 0.342 | 0.558 | 0.900 | 0.197 |
| CR1  | 4310446 11117959 6656401  | 433       | 0.528 | 0.904 | 0.940 | 0.474 | 0.568 |
| CR1  | 4310446 11117959 6656401  | 213       | 0.769 | 0.907 | 0.593 | 0.174 | 0.296 |
| CR1  | 4310446 11117959 6656401  | 413       | 0.520 | 0.233 | 0.375 | 0.540 | 0.601 |
| CR1  | 11117959 6656401 10127904 | 133       | 0.999 | 0.496 | 0.173 | 0.574 | 0.935 |
| CR1  | 11117959 6656401 10127904 | 114       | 0.352 | 0.155 | 0.146 | 0.427 | 0.592 |
| CR1  | 11117959 6656401 10127904 | 334       | 0.819 | 0.964 | 0.935 | 0.522 | 0.432 |
| CR1  | 11117959 6656401 10127904 | 134       | 0.552 | 0.554 | 0.822 | 0.535 | 0.304 |
| CR1  | 6656401 10127904 650877   | 343       | 0.457 | 0.704 | 0.679 | 0.717 | 0.657 |
| CR1  | 6656401 10127904 650877   | 331       | 0.988 | 0.508 | 0.205 | 0.561 | 0.976 |
| CR1  | 6656401 10127904 650877   | 141       | 0.344 | 0.149 | 0.117 | 0.442 | 0.637 |
| CR1  | 6656401 10127904 650877   | 341       | 0.856 | 0.797 | 0.690 | 0.715 | 0.495 |
| CR1  | 10127904 650877 3818361   | 414       | 0.095 | 0.089 | 0.053 | 0.255 | 0.546 |
| CR1  | 10127904 650877 3818361   | 432       | 0.457 | 0.704 | 0.679 | 0.717 | 0.657 |
| CR1  | 10127904 650877 3818361   | 312       | 0.938 | 0.566 | 0.186 | 0.588 | 0.953 |
| CR1  | 10127904 650877 3818361   | 412       | 0.379 | 0.572 | 0.991 | 0.463 | 0.408 |
| PS2  | 1150895 2073489 1295640   | 222       | 0.139 | 0.385 | 0.638 | 0.845 | 0.195 |
| PS2  | 1150895 2073489 1295640   | 422       | 0.803 | 0.219 | 0.167 | 0.896 | 0.651 |
| PS2  | 1150895 2073489 1295640   | 444       | 0.171 | 0.126 | 0.828 | 0.533 | 0.873 |
| PS2  | 1150895 2073489 1295640   | 424       | 0.496 | 0.680 | 0.019 | 0.519 | 0.343 |
| PS2  | 2073489 1295640 2802268   | 443       | 0.063 | 0.013 | 0.453 | 0.424 | 0.932 |
| PS2  | 2073489 1295640 2802268   | 224       | 0.347 | 0.072 | 0.105 | 0.785 | 0.538 |
| PS2  | 2073489 1295640 2802268   | 444       | 0.849 | 0.550 | 0.581 | 0.976 | 0.896 |
| PS2  | 2073489 1295640 2802268   | 244       | 0.496 | 0.680 | 0.019 | 0.519 | 0.343 |
| PS2  | 1295640 2802268 16846644  | 244       | 0.974 | 0.300 | 0.151 | 0.838 | 0.680 |
| PS2  | 1295640 2802268 16846644  | 433       | 0.063 | 0.013 | 0.453 | 0.424 | 0.932 |
| PS2  | 1295640 2802268 16846644  | 243       | 0.268 | 0.283 | 0.667 | 0.911 | 0.235 |
| PS2  | 1295640 2802268 16846644  | 443       | 0.532 | 0.815 | 0.258 | 0.677 | 0.446 |
| PS2  | 2802268 16846644 12126925 | 331       | 0.661 | 0.657 | 0.520 | 0.326 | 0.464 |
| PS2  | 2802268 16846644 12126925 | 431       | 0.572 | 0.461 | 0.432 | 0.160 | 0.874 |
| PS2  | 2802268 16846644 12126925 | 443       | 0.893 | 0.252 | 0.111 | 0.881 | 0.609 |
| PS2  | 2802268 16846644 12126925 | 333       | 0.066 | 0.012 | 0.346 | 0.283 | 0.791 |

|             |          |          |          |     |       |       |       |       |       |
|-------------|----------|----------|----------|-----|-------|-------|-------|-------|-------|
| <b>PS2</b>  | 2802268  | 16846644 | 12126925 | 433 | 0.256 | 0.556 | 0.188 | 0.109 | 0.850 |
| <b>BIN1</b> | 4662703  | 880436   | 3768857  | 341 | 0.431 | 0.929 | 0.330 | 0.426 | 0.756 |
| <b>BIN1</b> | 4662703  | 880436   | 3768857  | 343 | 0.104 | 0.329 | 0.074 | 0.475 | 0.860 |
| <b>BIN1</b> | 4662703  | 880436   | 3768857  | 123 | 0.563 | 0.574 | 0.493 | 0.661 | 0.975 |
| <b>BIN1</b> | 880436   | 3768857  | 17014873 | 232 | 0.342 | 0.222 | 0.008 | 0.837 | 0.280 |
| <b>BIN1</b> | 880436   | 3768857  | 17014873 | 411 | 0.451 | 0.953 | 0.370 | 0.375 | 0.794 |
| <b>BIN1</b> | 880436   | 3768857  | 17014873 | 431 | 0.116 | 0.359 | 0.081 | 0.450 | 0.998 |
| <b>BIN1</b> | 880436   | 3768857  | 17014873 | 231 | 0.994 | 0.920 | 0.485 | 0.678 | 0.512 |
| <b>BIN1</b> | 3768857  | 17014873 | 2276575  | 323 | 0.106 | 0.173 | 0.215 | 0.410 | 0.545 |
| <b>BIN1</b> | 3768857  | 17014873 | 2276575  | 313 | 0.009 | 0.080 | 0.031 | 0.078 | 0.042 |
| <b>BIN1</b> | 3768857  | 17014873 | 2276575  | 321 | 0.988 | 0.573 | 0.011 | 0.661 | 0.470 |
| <b>BIN1</b> | 3768857  | 17014873 | 2276575  | 111 | 0.352 | 0.820 | 0.417 | 0.254 | 0.934 |
| <b>BIN1</b> | 3768857  | 17014873 | 2276575  | 311 | 0.546 | 0.695 | 0.618 | 0.850 | 0.416 |
| <b>BIN1</b> | 17014873 | 2276575  | 13430599 | 234 | 0.140 | 0.196 | 0.233 | 0.404 | 0.452 |
| <b>BIN1</b> | 17014873 | 2276575  | 13430599 | 134 | 0.008 | 0.087 | 0.038 | 0.074 | 0.047 |
| <b>BIN1</b> | 17014873 | 2276575  | 13430599 | 213 | 0.954 | 0.518 | 0.007 | 0.686 | 0.411 |
| <b>BIN1</b> | 17014873 | 2276575  | 13430599 | 113 | 0.101 | 0.502 | 0.893 | 0.174 | 0.299 |
| <b>BIN1</b> | 2276575  | 13430599 | 10194375 | 341 | 0.067 | 0.268 | 0.128 | 0.185 | 0.108 |
| <b>BIN1</b> | 2276575  | 13430599 | 10194375 | 131 | 0.612 | 0.990 | 0.954 | 0.254 | 0.953 |
| <b>BIN1</b> | 2276575  | 13430599 | 10194375 | 132 | 0.324 | 0.425 | 0.260 | 0.051 | 0.265 |
| <b>BIN1</b> | 13430599 | 10194375 | 13426725 | 412 | 0.068 | 0.240 | 0.107 | 0.159 | 0.072 |
| <b>BIN1</b> | 13430599 | 10194375 | 13426725 | 314 | 0.665 | 0.977 | 0.957 | 0.225 | 0.933 |
| <b>BIN1</b> | 13430599 | 10194375 | 13426725 | 324 | 0.324 | 0.431 | 0.265 | 0.052 | 0.277 |
| <b>BIN1</b> | 10194375 | 13426725 | 10200967 | 242 | 0.210 | 0.025 | 0.527 | 0.031 | 0.887 |
| <b>BIN1</b> | 10194375 | 13426725 | 10200967 | 124 | 0.078 | 0.236 | 0.072 | 0.181 | 0.101 |
| <b>BIN1</b> | 10194375 | 13426725 | 10200967 | 144 | 0.670 | 0.983 | 0.904 | 0.250 | 0.952 |
| <b>BIN1</b> | 10194375 | 13426725 | 10200967 | 244 | 0.905 | 0.266 | 0.535 | 0.989 | 0.309 |
| <b>BIN1</b> | 13426725 | 10200967 | 17014923 | 444 | 0.986 | 0.223 | 0.868 | 0.390 | 0.646 |
| <b>BIN1</b> | 13426725 | 10200967 | 17014923 | 422 | 0.206 | 0.023 | 0.484 | 0.030 | 0.871 |
| <b>BIN1</b> | 13426725 | 10200967 | 17014923 | 242 | 0.091 | 0.272 | 0.099 | 0.188 | 0.123 |
| <b>BIN1</b> | 13426725 | 10200967 | 17014923 | 442 | 0.880 | 0.833 | 0.460 | 0.119 | 0.519 |
| <b>BIN1</b> | 10200967 | 17014923 | 6709337  | 221 | 0.208 | 0.026 | 0.458 | 0.032 | 0.749 |
| <b>BIN1</b> | 10200967 | 17014923 | 6709337  | 421 | 0.143 | 0.319 | 0.183 | 0.268 | 0.060 |
| <b>BIN1</b> | 10200967 | 17014923 | 6709337  | 442 | 0.986 | 0.223 | 0.868 | 0.391 | 0.646 |
| <b>BIN1</b> | 10200967 | 17014923 | 6709337  | 422 | 0.973 | 0.766 | 0.621 | 0.084 | 0.379 |
| <b>BIN1</b> | 17014923 | 6709337  | 11678252 | 423 | 0.978 | 0.189 | 0.816 | 0.330 | 0.629 |
| <b>BIN1</b> | 17014923 | 6709337  | 11678252 | 223 | 0.679 | 0.828 | 0.890 | 0.106 | 0.869 |
| <b>BIN1</b> | 17014923 | 6709337  | 11678252 | 211 | 0.865 | 0.275 | 0.682 | 0.421 | 0.251 |
| <b>BIN1</b> | 17014923 | 6709337  | 11678252 | 221 | 0.606 | 0.962 | 0.464 | 0.683 | 0.248 |
| <b>BIN1</b> | 6709337  | 11678252 | 873270   | 213 | 0.605 | 0.955 | 0.500 | 0.644 | 0.259 |
| <b>BIN1</b> | 6709337  | 11678252 | 873270   | 231 | 0.717 | 0.221 | 0.734 | 0.470 | 0.834 |
| <b>BIN1</b> | 6709337  | 11678252 | 873270   | 111 | 0.865 | 0.275 | 0.682 | 0.421 | 0.251 |
| <b>BIN1</b> | 11678252 | 873270   | 749008   | 132 | 0.612 | 0.950 | 0.500 | 0.643 | 0.256 |
| <b>BIN1</b> | 11678252 | 873270   | 749008   | 312 | 0.695 | 0.194 | 0.754 | 0.729 | 0.493 |
| <b>BIN1</b> | 11678252 | 873270   | 749008   | 314 | 0.337 | 0.878 | 0.945 | 0.353 | 0.710 |
| <b>BIN1</b> | 11678252 | 873270   | 749008   | 114 | 0.902 | 0.270 | 0.799 | 0.405 | 0.264 |
| <b>BIN1</b> | 873270   | 749008   | 6743470  | 124 | 0.756 | 0.203 | 0.772 | 0.765 | 0.445 |
| <b>BIN1</b> | 873270   | 749008   | 6743470  | 144 | 0.145 | 0.677 | 0.689 | 0.083 | 0.371 |
| <b>BIN1</b> | 873270   | 749008   | 6743470  | 323 | 0.614 | 0.920 | 0.470 | 0.702 | 0.253 |
| <b>BIN1</b> | 873270   | 749008   | 6743470  | 143 | 0.697 | 0.375 | 0.818 | 0.688 | 0.207 |
| <b>BIN1</b> | 749008   | 6743470  | 4663098  | 434 | 0.579 | 0.136 | 0.645 | 0.059 | 0.984 |
| <b>BIN1</b> | 749008   | 6743470  | 4663098  | 242 | 0.813 | 0.228 | 0.794 | 0.791 | 0.395 |

|               |                            |     |       |       |       |       |       |
|---------------|----------------------------|-----|-------|-------|-------|-------|-------|
| <b>BIN1</b>   | 749008 6743470 4663098     | 442 | 0.191 | 0.945 | 0.635 | 0.094 | 0.396 |
| <b>BIN1</b>   | 749008 6743470 4663098     | 232 | 0.520 | 0.962 | 0.454 | 0.817 | 0.293 |
| <b>BIN1</b>   | 749008 6743470 4663098     | 432 | 0.987 | 0.775 | 0.540 | 0.221 | 0.199 |
| <b>BIN1</b>   | 6743470 4663098 744373     | 323 | 0.549 | 0.959 | 0.632 | 0.354 | 0.718 |
| <b>BIN1</b>   | 6743470 4663098 744373     | 344 | 0.635 | 0.173 | 0.897 | 0.139 | 0.919 |
| <b>BIN1</b>   | 6743470 4663098 744373     | 424 | 0.918 | 0.247 | 0.713 | 0.876 | 0.522 |
| <b>BIN1</b>   | 6743470 4663098 744373     | 324 | 0.243 | 0.827 | 0.621 | 0.519 | 0.383 |
| <b>CLU</b>    | 7012010 10101779 10503814  | 224 | 0.395 | 0.361 | 0.959 | 0.655 | 0.656 |
| <b>CLU</b>    | 7012010 10101779 10503814  | 222 | 0.106 | 0.119 | 0.556 | 0.012 | 0.942 |
| <b>CLU</b>    | 7012010 10101779 10503814  | 242 | 0.337 | 0.981 | 0.322 | 0.935 | 0.160 |
| <b>CLU</b>    | 7012010 10101779 10503814  | 442 | 0.107 | 0.248 | 0.457 | 0.019 | 0.815 |
| <b>CLU</b>    | 10101779 10503814 11136000 | 424 | 0.269 | 0.508 | 0.526 | 0.610 | 0.418 |
| <b>CLU</b>    | 10101779 10503814 11136000 | 242 | 0.306 | 0.294 | 0.902 | 0.785 | 0.579 |
| <b>CLU</b>    | 10101779 10503814 11136000 | 222 | 0.123 | 0.136 | 0.502 | 0.015 | 0.934 |
| <b>CLU</b>    | 10101779 10503814 11136000 | 422 | 0.976 | 0.705 | 0.778 | 0.103 | 0.510 |
| <b>CLU</b>    | 10503814 11136000 9314349  | 243 | 0.281 | 0.697 | 0.023 | 0.319 | 0.070 |
| <b>CLU</b>    | 10503814 11136000 9314349  | 423 | 0.286 | 0.331 | 0.959 | 0.660 | 0.416 |
| <b>CLU</b>    | 10503814 11136000 9314349  | 223 | 0.807 | 0.925 | 0.875 | 0.615 | 0.429 |
| <b>CLU</b>    | 10503814 11136000 9314349  | 241 | 0.590 | 0.345 | 0.596 | 0.977 | 0.948 |
| <b>CLU</b>    | 10503814 11136000 9314349  | 221 | 0.099 | 0.343 | 0.429 | 0.298 | 0.150 |
| <b>CLU</b>    | 11136000 9314349 492638    | 434 | 0.977 | 0.318 | 0.027 | 0.750 | 0.536 |
| <b>CLU</b>    | 11136000 9314349 492638    | 414 | 0.398 | 0.689 | 0.690 | 0.442 | 0.514 |
| <b>CLU</b>    | 11136000 9314349 492638    | 214 | 0.879 | 0.709 | 0.453 | 0.781 | 0.061 |
| <b>CLU</b>    | 11136000 9314349 492638    | 433 | 0.160 | 0.697 | 0.201 | 0.358 | 0.181 |
| <b>CLU</b>    | 11136000 9314349 492638    | 233 | 0.660 | 0.949 | 0.904 | 0.554 | 0.436 |
| <b>CLU</b>    | 11136000 9314349 492638    | 413 | 0.465 | 0.590 | 0.214 | 0.221 | 0.170 |
| <b>CLU</b>    | 11136000 9314349 492638    | 213 | 0.104 | 0.333 | 0.212 | 0.266 | 0.433 |
| <b>PICALM</b> | 10898425 618679 2077815    | 443 | 0.970 | 0.972 | 0.598 | 0.942 | 0.553 |
| <b>PICALM</b> | 10898425 618679 2077815    | 243 | 0.890 | 0.580 | 0.940 | 0.133 | 0.137 |
| <b>PICALM</b> | 10898425 618679 2077815    | 431 | 0.841 | 0.501 | 0.351 | 0.634 | 0.565 |
| <b>PICALM</b> | 10898425 618679 2077815    | 231 | 0.690 | 0.789 | 0.252 | 0.470 | 0.424 |
| <b>PICALM</b> | 618679 2077815 10898427    | 313 | 0.849 | 0.081 | 0.210 | 0.029 | 0.358 |
| <b>PICALM</b> | 618679 2077815 10898427    | 431 | 0.892 | 0.644 | 0.768 | 0.184 | 0.122 |
| <b>PICALM</b> | 618679 2077815 10898427    | 311 | 0.981 | 0.307 | 0.231 | 0.524 | 0.573 |
| <b>PICALM</b> | 2077815 10898427 11234495  | 134 | 0.849 | 0.081 | 0.210 | 0.029 | 0.358 |
| <b>PICALM</b> | 2077815 10898427 11234495  | 114 | 0.403 | 0.741 | 0.289 | 0.443 | 0.736 |
| <b>PICALM</b> | 2077815 10898427 11234495  | 312 | 0.824 | 0.617 | 0.826 | 0.155 | 0.102 |
| <b>PICALM</b> | 2077815 10898427 11234495  | 112 | 0.714 | 0.253 | 0.454 | 0.751 | 0.675 |
| <b>PICALM</b> | 10898427 11234495 510566   | 121 | 0.658 | 0.847 | 0.920 | 0.846 | 0.852 |
| <b>PICALM</b> | 10898427 11234495 510566   | 342 | 0.849 | 0.081 | 0.210 | 0.029 | 0.358 |
| <b>PICALM</b> | 10898427 11234495 510566   | 142 | 0.403 | 0.741 | 0.289 | 0.443 | 0.736 |
| <b>PICALM</b> | 10898427 11234495 510566   | 122 | 0.860 | 0.173 | 0.627 | 0.112 | 0.308 |
| <b>PICALM</b> | 11234495 510566 10501602   | 223 | 0.208 | 0.080 | 0.128 | 0.479 | 0.032 |
| <b>PICALM</b> | 11234495 510566 10501602   | 211 | 0.658 | 0.847 | 0.920 | 0.846 | 0.852 |
| <b>PICALM</b> | 11234495 510566 10501602   | 421 | 0.827 | 0.077 | 0.509 | 0.097 | 0.315 |
| <b>PICALM</b> | 11234495 510566 10501602   | 221 | 0.538 | 0.761 | 0.636 | 0.227 | 0.754 |
| <b>PICALM</b> | 510566 10501602 10501604   | 211 | 0.999 | 0.121 | 0.175 | 0.038 | 0.313 |
| <b>PICALM</b> | 510566 10501602 10501604   | 233 | 0.207 | 0.080 | 0.128 | 0.477 | 0.032 |
| <b>PICALM</b> | 510566 10501602 10501604   | 113 | 0.658 | 0.847 | 0.920 | 0.846 | 0.852 |
| <b>PICALM</b> | 510566 10501602 10501604   | 213 | 0.682 | 0.955 | 0.992 | 0.180 | 0.681 |
| <b>PICALM</b> | 10501602 10501604 713346   | 112 | 0.991 | 0.190 | 0.187 | 0.028 | 0.324 |

|        |          |          |          |     |       |       |       |       |       |
|--------|----------|----------|----------|-----|-------|-------|-------|-------|-------|
| PICALM | 10501602 | 10501604 | 713346   | 132 | 0.985 | 0.981 | 0.460 | 0.624 | 0.603 |
| PICALM | 10501602 | 10501604 | 713346   | 331 | 0.205 | 0.080 | 0.127 | 0.474 | 0.032 |
| PICALM | 10501602 | 10501604 | 713346   | 131 | 0.399 | 0.921 | 0.750 | 0.335 | 0.369 |
| PICALM | 10501604 | 713346   | 475639   | 122 | 0.991 | 0.190 | 0.187 | 0.028 | 0.324 |
| PICALM | 10501604 | 713346   | 475639   | 322 | 0.985 | 0.981 | 0.460 | 0.624 | 0.603 |
| PICALM | 10501604 | 713346   | 475639   | 312 | 0.876 | 0.864 | 0.698 | 0.956 | 0.499 |
| PICALM | 10501604 | 713346   | 475639   | 314 | 0.903 | 0.192 | 0.744 | 0.171 | 0.292 |
| PICALM | 713346   | 475639   | 669336   | 121 | 0.506 | 0.905 | 0.924 | 0.537 | 0.444 |
| PICALM | 713346   | 475639   | 669336   | 223 | 0.983 | 0.250 | 0.469 | 0.099 | 0.574 |
| PICALM | 713346   | 475639   | 669336   | 123 | 0.363 | 0.585 | 0.386 | 0.221 | 0.974 |
| PICALM | 713346   | 475639   | 669336   | 143 | 0.903 | 0.192 | 0.744 | 0.171 | 0.292 |
| PICALM | 475639   | 669336   | 7938033  | 212 | 0.521 | 0.266 | 0.130 | 0.906 | 0.631 |
| PICALM | 475639   | 669336   | 7938033  | 232 | 0.594 | 0.206 | 0.845 | 0.345 | 0.584 |
| PICALM | 475639   | 669336   | 7938033  | 432 | 0.201 | 0.042 | 0.127 | 0.133 | 0.077 |
| PICALM | 475639   | 669336   | 7938033  | 211 | 0.675 | 0.465 | 0.359 | 0.519 | 0.258 |
| PICALM | 475639   | 669336   | 7938033  | 431 | 0.483 | 0.945 | 0.515 | 0.634 | 0.974 |
| PICALM | 669336   | 7938033  | 10792820 | 322 | 0.911 | 0.201 | 0.504 | 0.133 | 0.537 |
| PICALM | 669336   | 7938033  | 10792820 | 121 | 0.538 | 0.300 | 0.155 | 0.885 | 0.637 |
| PICALM | 669336   | 7938033  | 10792820 | 321 | 0.117 | 0.086 | 0.068 | 0.053 | 0.105 |
| PICALM | 669336   | 7938033  | 10792820 | 111 | 0.754 | 0.572 | 0.452 | 0.516 | 0.253 |
| PICALM | 669336   | 7938033  | 10792820 | 311 | 0.470 | 0.976 | 0.504 | 0.631 | 0.967 |
| PICALM | 7938033  | 10792820 | 527162   | 112 | 0.926 | 0.971 | 0.507 | 0.537 | 0.164 |
| PICALM | 7938033  | 10792820 | 527162   | 224 | 0.911 | 0.201 | 0.504 | 0.133 | 0.537 |
| PICALM | 7938033  | 10792820 | 527162   | 214 | 0.265 | 0.093 | 0.033 | 0.294 | 0.163 |
| PICALM | 7938033  | 10792820 | 527162   | 114 | 0.312 | 0.647 | 0.494 | 0.632 | 0.049 |
| PICALM | 10792820 | 527162   | 680119   | 124 | 0.846 | 0.926 | 0.482 | 0.542 | 0.154 |
| PICALM | 10792820 | 527162   | 680119   | 144 | 0.138 | 0.497 | 0.653 | 0.952 | 0.056 |
| PICALM | 10792820 | 527162   | 680119   | 242 | 0.992 | 0.173 | 0.449 | 0.121 | 0.559 |
| PICALM | 10792820 | 527162   | 680119   | 142 | 0.286 | 0.146 | 0.162 | 0.748 | 0.479 |
| PICALM | 527162   | 680119   | 10792821 | 422 | 0.820 | 0.073 | 0.203 | 0.037 | 0.334 |
| PICALM | 527162   | 680119   | 10792821 | 244 | 0.837 | 0.916 | 0.489 | 0.540 | 0.153 |
| PICALM | 527162   | 680119   | 10792821 | 444 | 0.135 | 0.489 | 0.646 | 0.954 | 0.056 |
| PICALM | 527162   | 680119   | 10792821 | 424 | 0.207 | 0.086 | 0.078 | 0.507 | 0.327 |
| PICALM | 680119   | 10792821 | 642949   | 222 | 0.828 | 0.074 | 0.205 | 0.038 | 0.337 |
| PICALM | 680119   | 10792821 | 642949   | 242 | 0.886 | 0.603 | 0.363 | 0.489 | 0.997 |
| PICALM | 680119   | 10792821 | 642949   | 444 | 0.300 | 0.636 | 0.348 | 0.585 | 0.700 |
| PICALM | 680119   | 10792821 | 642949   | 244 | 0.148 | 0.085 | 0.153 | 0.467 | 0.193 |
| PICALM | 10792821 | 642949   | 666682   | 222 | 0.828 | 0.074 | 0.205 | 0.038 | 0.337 |
| PICALM | 10792821 | 642949   | 666682   | 422 | 0.859 | 0.645 | 0.379 | 0.494 | 0.980 |
| PICALM | 10792821 | 642949   | 666682   | 442 | 0.550 | 0.937 | 0.815 | 0.802 | 0.554 |
| PICALM | 10792821 | 642949   | 666682   | 444 | 0.931 | 0.254 | 0.823 | 0.322 | 0.244 |
| PICALM | 642949   | 666682   | 664629   | 223 | 0.954 | 0.865 | 0.270 | 0.931 | 0.978 |
| PICALM | 642949   | 666682   | 664629   | 423 | 0.953 | 0.972 | 0.681 | 0.622 | 0.883 |
| PICALM | 642949   | 666682   | 664629   | 443 | 0.873 | 0.055 | 0.196 | 0.199 | 0.068 |
| PICALM | 642949   | 666682   | 664629   | 221 | 0.719 | 0.089 | 0.104 | 0.086 | 0.259 |
| PICALM | 642949   | 666682   | 664629   | 421 | 0.357 | 0.834 | 0.363 | 0.294 | 0.229 |
| PICALM | 642949   | 666682   | 664629   | 441 | 0.844 | 0.970 | 0.562 | 0.785 | 0.902 |
| PICALM | 666682   | 664629   | 17745273 | 413 | 0.334 | 0.809 | 0.817 | 0.671 | 0.114 |
| PICALM | 666682   | 664629   | 17745273 | 231 | 0.916 | 0.929 | 0.455 | 0.853 | 0.904 |
| PICALM | 666682   | 664629   | 17745273 | 431 | 0.725 | 0.046 | 0.240 | 0.207 | 0.037 |
| PICALM | 666682   | 664629   | 17745273 | 211 | 0.787 | 0.126 | 0.288 | 0.324 | 0.178 |
| PICALM | 666682   | 664629   | 17745273 | 411 | 0.543 | 0.823 | 0.683 | 0.460 | 0.098 |

|               |                          |     |       |       |       |       |       |
|---------------|--------------------------|-----|-------|-------|-------|-------|-------|
| <b>PICALM</b> | 664629 17745273 1941375  | 313 | 0.602 | 0.974 | 0.633 | 0.804 | 0.830 |
| <b>PICALM</b> | 664629 17745273 1941375  | 131 | 0.332 | 0.806 | 0.822 | 0.669 | 0.115 |
| <b>PICALM</b> | 664629 17745273 1941375  | 311 | 0.373 | 0.058 | 0.170 | 0.199 | 0.037 |
| <b>PICALM</b> | 664629 17745273 1941375  | 111 | 0.562 | 0.259 | 0.259 | 0.690 | 0.980 |
| <b>PICALM</b> | 17745273 1941375 677909  | 113 | 0.461 | 0.151 | 0.635 | 0.158 | 0.009 |
| <b>PICALM</b> | 17745273 1941375 677909  | 131 | 0.684 | 0.897 | 0.629 | 0.927 | 0.918 |
| <b>PICALM</b> | 17745273 1941375 677909  | 311 | 0.334 | 0.809 | 0.817 | 0.671 | 0.114 |
| <b>PICALM</b> | 17745273 1941375 677909  | 111 | 0.593 | 0.126 | 0.407 | 0.277 | 0.190 |
| <b>PICALM</b> | 1941375 677909 11234532  | 111 | 0.651 | 0.265 | 0.046 | 0.134 | 0.352 |
| <b>PICALM</b> | 1941375 677909 11234532  | 133 | 0.464 | 0.157 | 0.665 | 0.158 | 0.010 |
| <b>PICALM</b> | 1941375 677909 11234532  | 313 | 0.684 | 0.897 | 0.629 | 0.927 | 0.918 |
| <b>PICALM</b> | 1941375 677909 11234532  | 113 | 0.513 | 0.427 | 0.654 | 0.750 | 0.063 |
| <b>PICALM</b> | 677909 11234532 10501608 | 111 | 0.651 | 0.265 | 0.046 | 0.134 | 0.352 |
| <b>PICALM</b> | 677909 11234532 10501608 | 131 | 0.500 | 0.300 | 0.678 | 0.252 | 0.652 |
| <b>PICALM</b> | 677909 11234532 10501608 | 333 | 0.462 | 0.153 | 0.645 | 0.158 | 0.009 |
| <b>PICALM</b> | 677909 11234532 10501608 | 133 | 0.535 | 0.903 | 0.547 | 0.850 | 0.113 |
| <b>PICALM</b> | 11234532 10501608 669556 | 333 | 0.989 | 0.715 | 0.611 | 0.250 | 0.172 |
| <b>PICALM</b> | 11234532 10501608 669556 | 111 | 0.651 | 0.265 | 0.046 | 0.134 | 0.352 |
| <b>PICALM</b> | 11234532 10501608 669556 | 311 | 0.504 | 0.304 | 0.656 | 0.257 | 0.652 |
| <b>PICALM</b> | 11234532 10501608 669556 | 331 | 0.967 | 0.339 | 0.139 | 0.522 | 0.803 |
| <b>PICALM</b> | 10501608 669556 621942   | 314 | 0.727 | 0.711 | 0.889 | 0.699 | 0.801 |
| <b>PICALM</b> | 10501608 669556 621942   | 333 | 0.996 | 0.725 | 0.601 | 0.257 | 0.174 |
| <b>PICALM</b> | 10501608 669556 621942   | 113 | 0.946 | 0.107 | 0.166 | 0.045 | 0.283 |
| <b>PICALM</b> | 10501608 669556 621942   | 313 | 0.733 | 0.529 | 0.181 | 0.757 | 0.977 |
| <b>PICALM</b> | 669556 621942 536841     | 332 | 0.996 | 0.725 | 0.601 | 0.257 | 0.174 |
| <b>PICALM</b> | 669556 621942 536841     | 132 | 0.337 | 0.124 | 0.126 | 0.748 | 0.065 |
| <b>PICALM</b> | 669556 621942 536841     | 144 | 0.727 | 0.711 | 0.889 | 0.699 | 0.801 |
| <b>PICALM</b> | 669556 621942 536841     | 134 | 0.767 | 0.124 | 0.512 | 0.157 | 0.046 |
| <b>PICALM</b> | 621942 536841 541458     | 322 | 0.525 | 0.190 | 0.573 | 0.247 | 0.018 |
| <b>PICALM</b> | 621942 536841 541458     | 444 | 0.727 | 0.711 | 0.889 | 0.699 | 0.801 |
| <b>PICALM</b> | 621942 536841 541458     | 344 | 0.768 | 0.124 | 0.518 | 0.159 | 0.045 |
| <b>PICALM</b> | 536841 541458 3851179    | 221 | 0.611 | 0.190 | 0.480 | 0.148 | 0.025 |
| <b>PICALM</b> | 536841 541458 3851179    | 441 | 0.604 | 0.214 | 0.029 | 0.007 | 0.040 |
| <b>PICALM</b> | 536841 541458 3851179    | 223 | 0.645 | 0.945 | 0.650 | 0.353 | 0.564 |
| <b>PICALM</b> | 536841 541458 3851179    | 443 | 0.753 | 0.581 | 0.497 | 0.695 | 0.269 |
| <b>PS1</b>    | 362412 214273 8006497    | 223 | 0.964 | 0.842 | 0.262 | 0.865 | 0.013 |
| <b>PS1</b>    | 362412 214273 8006497    | 241 | 0.769 | 0.891 | 0.579 | 0.475 | 0.106 |
| <b>PS1</b>    | 362412 214273 8006497    | 421 | 0.381 | 0.232 | 0.526 | 0.495 | 0.277 |
| <b>PS1</b>    | 362412 214273 8006497    | 221 | 0.715 | 0.278 | 0.594 | 0.894 | 0.811 |
| <b>PS1</b>    | 214273 8006497 362350    | 213 | 0.661 | 0.090 | 0.751 | 0.708 | 0.808 |
| <b>PS1</b>    | 214273 8006497 362350    | 231 | 0.964 | 0.842 | 0.262 | 0.865 | 0.013 |
| <b>PS1</b>    | 214273 8006497 362350    | 411 | 0.769 | 0.891 | 0.579 | 0.475 | 0.106 |
| <b>PS1</b>    | 214273 8006497 362350    | 211 | 0.595 | 0.439 | 0.912 | 0.392 | 0.681 |
| <b>PS1</b>    | 8006497 362350 214260    | 131 | 0.774 | 0.117 | 0.891 | 0.680 | 0.770 |
| <b>PS1</b>    | 8006497 362350 214260    | 111 | 0.142 | 0.167 | 0.360 | 0.128 | 0.265 |
| <b>PS1</b>    | 8006497 362350 214260    | 313 | 0.973 | 0.849 | 0.246 | 0.874 | 0.013 |
| <b>PS1</b>    | 8006497 362350 214260    | 113 | 0.472 | 0.932 | 0.895 | 0.383 | 0.036 |
| <b>PS1</b>    | 362350 214260 165933     | 134 | 0.758 | 0.986 | 0.480 | 0.867 | 0.693 |
| <b>PS1</b>    | 362350 214260 165933     | 312 | 0.781 | 0.121 | 0.905 | 0.689 | 0.753 |
| <b>PS1</b>    | 362350 214260 165933     | 112 | 0.142 | 0.167 | 0.360 | 0.128 | 0.265 |
| <b>PS1</b>    | 362350 214260 165933     | 132 | 0.706 | 0.888 | 0.352 | 0.568 | 0.612 |

|               |          |          |            |  |     |       |       |       |       |       |
|---------------|----------|----------|------------|--|-----|-------|-------|-------|-------|-------|
| <i>PS1</i>    | 214260   | 165933   | 362377     |  | 121 | 0.096 | 0.157 | 0.335 | 0.128 | 0.221 |
| <i>PS1</i>    | 214260   | 165933   | 362377     |  | 343 | 0.741 | 0.998 | 0.498 | 0.870 | 0.690 |
| <i>PS1</i>    | 214260   | 165933   | 362377     |  | 123 | 0.647 | 0.120 | 0.872 | 0.703 | 0.834 |
| <i>PS1</i>    | 214260   | 165933   | 362377     |  | 323 | 0.648 | 0.946 | 0.305 | 0.575 | 0.586 |
| <i>PS1</i>    | 165933   | 362377   | 165935     |  | 233 | 0.684 | 0.922 | 0.826 | 0.455 | 0.464 |
| <i>PS1</i>    | 165933   | 362377   | 165935     |  | 211 | 0.096 | 0.157 | 0.335 | 0.128 | 0.221 |
| <i>PS1</i>    | 165933   | 362377   | 165935     |  | 431 | 0.814 | 0.942 | 0.463 | 0.820 | 0.649 |
| <i>PS1</i>    | 165933   | 362377   | 165935     |  | 231 | 0.738 | 0.322 | 0.347 | 0.970 | 0.742 |
| <i>PS1</i>    | 362377   | 165935   | 362346     |  | 111 | 0.096 | 0.157 | 0.335 | 0.128 | 0.221 |
| <i>PS1</i>    | 362377   | 165935   | 362346     |  | 333 | 0.629 | 0.969 | 0.795 | 0.486 | 0.490 |
| <i>PS1</i>    | 362377   | 165935   | 362346     |  | 313 | 0.619 | 0.380 | 0.753 | 0.832 | 0.965 |
| <i>chr 19</i> | 7247764  | 28555639 | 12460041   |  | 242 | 0.339 | 0.089 | 0.332 | 0.120 | 0.378 |
| <i>chr 19</i> | 7247764  | 28555639 | 12460041   |  | 414 | 0.900 | 0.184 | 0.327 | 0.062 | 0.967 |
| <i>chr 19</i> | 7247764  | 28555639 | 12460041   |  | 244 | 0.301 | 0.185 | 0.141 | 0.061 | 0.530 |
| <i>chr 19</i> | 7247764  | 28555639 | 12460041 * |  | 444 | 0.278 | 0.434 | 0.026 | 0.000 | 0.383 |
| <i>chr 19</i> | 28555639 | 12460041 | 2627641    |  | 142 | 0.885 | 0.383 | 0.419 | 0.064 | 0.886 |
| <i>chr 19</i> | 28555639 | 12460041 | 2627641    |  | 442 | 0.445 | 0.865 | 0.868 | 0.920 | 0.401 |
| <i>chr 19</i> | 28555639 | 12460041 | 2627641    |  | 424 | 0.214 | 0.043 | 0.413 | 0.200 | 0.260 |
| <i>chr 19</i> | 28555639 | 12460041 | 2627641    |  | 144 | 0.797 | 0.277 | 0.491 | 0.266 | 0.880 |
| <i>chr 19</i> | 28555639 | 12460041 | 2627641    |  | 444 | 0.973 | 0.900 | 0.235 | 0.019 | 0.942 |
| <i>chr 19</i> | 12460041 | 2627641  | 597668     |  | 422 | 0.545 | 0.725 | 0.797 | 0.300 | 0.490 |
| <i>chr 19</i> | 12460041 | 2627641  | 597668     |  | 244 | 0.218 | 0.045 | 0.400 | 0.218 | 0.268 |
| <i>chr 19</i> | 12460041 | 2627641  | 597668     |  | 444 | 0.919 | 0.396 | 0.425 | 0.078 | 0.975 |
| <i>chr 19</i> | 2627641  | 597668   | 10422797   |  | 222 | 0.564 | 0.786 | 0.979 | 0.687 | 0.350 |
| <i>chr 19</i> | 2627641  | 597668   | 10422797   |  | 442 | 0.874 | 0.779 | 0.052 | 0.500 | 0.306 |
| <i>chr 19</i> | 2627641  | 597668   | 10422797   |  | 224 | 0.594 | 0.607 | 0.724 | 0.161 | 0.637 |
| <i>chr 19</i> | 2627641  | 597668   | 10422797   |  | 444 | 0.519 | 0.768 | 0.808 | 0.345 | 0.287 |
| <i>chr 19</i> | 597668   | 10422797 | 346763     |  | 221 | 0.533 | 0.792 | 0.965 | 0.706 | 0.365 |
| <i>chr 19</i> | 597668   | 10422797 | 346763     |  | 421 | 0.867 | 0.768 | 0.054 | 0.507 | 0.312 |
| <i>chr 19</i> | 597668   | 10422797 | 346763     |  | 243 | 0.616 | 0.598 | 0.721 | 0.178 | 0.612 |
| <i>chr 19</i> | 597668   | 10422797 | 346763     |  | 443 | 0.520 | 0.771 | 0.812 | 0.343 | 0.289 |
| <i>chr 19</i> | 10422797 | 346763   | 17356664   |  | 434 | 0.197 | 0.307 | 0.151 | 0.249 | 0.932 |
| <i>chr 19</i> | 10422797 | 346763   | 17356664   |  | 212 | 0.614 | 0.576 | 0.329 | 0.944 | 0.312 |
| <i>chr 19</i> | 10422797 | 346763   | 17356664   |  | 432 | 0.259 | 0.252 | 0.328 | 0.361 | 0.715 |
| <i>chr 19</i> | 346763   | 17356664 | 10445572   |  | 343 | 0.869 | 0.900 | 0.142 | 0.105 | 0.423 |
| <i>chr 19</i> | 346763   | 17356664 | 10445572   |  | 123 | 0.295 | 0.302 | 0.904 | 0.790 | 0.627 |
| <i>chr 19</i> | 346763   | 17356664 | 10445572   |  | 323 | 0.767 | 0.721 | 0.518 | 0.246 | 0.970 |
| <i>chr 19</i> | 346763   | 17356664 | 10445572   |  | 341 | 0.130 | 0.269 | 0.352 | 0.546 | 0.829 |
| <i>chr 19</i> | 346763   | 17356664 | 10445572   |  | 121 | 0.148 | 0.962 | 0.152 | 0.881 | 0.370 |
| <i>chr 19</i> | 346763   | 17356664 | 10445572   |  | 321 | 0.128 | 0.102 | 0.086 | 0.027 | 0.701 |
| <i>chr 19</i> | 17356664 | 10445572 | 2240672    |  | 431 | 0.660 | 0.471 | 0.030 | 0.309 | 0.069 |
| <i>chr 19</i> | 17356664 | 10445572 | 2240672    |  | 411 | 0.542 | 0.823 | 0.790 | 0.943 | 0.122 |
| <i>chr 19</i> | 17356664 | 10445572 | 2240672    |  | 211 | 0.245 | 0.310 | 0.169 | 0.049 | 0.177 |
| <i>chr 19</i> | 17356664 | 10445572 | 2240672    |  | 433 | 0.647 | 0.689 | 0.648 | 0.244 | 0.371 |
| <i>chr 19</i> | 17356664 | 10445572 | 2240672    |  | 233 | 0.722 | 0.734 | 0.616 | 0.216 | 0.743 |
| <i>chr 19</i> | 17356664 | 10445572 | 2240672    |  | 413 | 0.237 | 0.355 | 0.540 | 0.743 | 0.897 |
| <i>chr 19</i> | 17356664 | 10445572 | 2240672    |  | 213 | 0.263 | 0.398 | 0.229 | 0.492 | 0.093 |
| <i>chr 19</i> | 10445572 | 2240672  | 345409     |  | 312 | 0.923 | 0.422 | 0.169 | 0.440 | 0.063 |
| <i>chr 19</i> | 10445572 | 2240672  | 345409     |  | 112 | 0.411 | 0.329 | 0.412 | 0.070 | 0.305 |
| <i>chr 19</i> | 10445572 | 2240672  | 345409     |  | 332 | 0.658 | 0.666 | 0.691 | 0.061 | 0.840 |
| <i>chr 19</i> | 10445572 | 2240672  | 345409     |  | 132 | 0.315 | 0.614 | 0.323 | 0.440 | 0.029 |
| <i>chr 19</i> | 10445572 | 2240672  | 345409     |  | 334 | 0.622 | 0.657 | 0.460 | 0.036 | 0.735 |

|        |                         |     |       |       |       |       |       |
|--------|-------------------------|-----|-------|-------|-------|-------|-------|
| chr 19 | 10445572 2240672 345409 | 134 | 0.332 | 0.522 | 0.987 | 0.788 | 0.953 |
| chr 19 | 2240672 345409 11883302 | 122 | 0.073 | 0.112 | 0.049 | 0.011 | 0.545 |
| chr 19 | 2240672 345409 11883302 | 322 | 0.256 | 0.504 | 0.396 | 0.149 | 0.063 |
| chr 19 | 2240672 345409 11883302 | 342 | 0.119 | 0.989 | 0.835 | 0.434 | 0.935 |
| chr 19 | 2240672 345409 11883302 | 124 | 0.063 | 0.105 | 0.003 | 0.071 | 0.054 |
| chr 19 | 2240672 345409 11883302 | 344 | 0.344 | 0.334 | 0.452 | 0.018 | 0.729 |
| chr 19 | 345409 11883302 344807  | 224 | 0.384 | 0.290 | 0.293 | 0.106 | 0.562 |
| chr 19 | 345409 11883302 344807  | 444 | 0.688 | 0.923 | 0.977 | 0.171 | 0.534 |
| chr 19 | 345409 11883302 344807  | 222 | 0.033 | 0.107 | 0.038 | 0.005 | 0.503 |
| chr 19 | 345409 11883302 344807  | 422 | 0.108 | 0.889 | 0.841 | 0.435 | 0.815 |
| chr 19 | 345409 11883302 344807  | 242 | 0.081 | 0.128 | 0.003 | 0.130 | 0.121 |
| chr 19 | 345409 11883302 344807  | 442 | 0.152 | 0.250 | 0.427 | 0.213 | 0.817 |
| chr 19 | 11883302 344807 2306660 | 222 | 0.077 | 0.144 | 0.047 | 0.004 | 0.558 |
| chr 19 | 11883302 344807 2306660 | 244 | 0.605 | 0.276 | 0.219 | 0.089 | 0.851 |
| chr 19 | 11883302 344807 2306660 | 444 | 0.735 | 0.992 | 0.887 | 0.117 | 0.735 |
| chr 19 | 11883302 344807 2306660 | 224 | 0.743 | 0.699 | 0.733 | 0.658 | 0.038 |
| chr 19 | 11883302 344807 2306660 | 424 | 0.028 | 0.078 | 0.037 | 0.057 | 0.362 |
| chr 19 | 344807 2306660 8111989  | 242 | 0.031 | 0.134 | 0.268 | 0.068 | 0.774 |
| chr 19 | 344807 2306660 8111989  | 224 | 0.087 | 0.165 | 0.064 | 0.004 | 0.614 |
| chr 19 | 344807 2306660 8111989  | 444 | 0.420 | 0.672 | 0.629 | 0.346 | 0.787 |
| chr 19 | 344807 2306660 8111989  | 244 | 0.936 | 0.871 | 0.205 | 0.885 | 0.465 |
| chr 19 | 2306660 8111989 7260463 | 424 | 0.020 | 0.120 | 0.157 | 0.065 | 0.748 |
| chr 19 | 2306660 8111989 7260463 | 244 | 0.730 | 0.570 | 0.986 | 0.630 | 0.690 |
| chr 19 | 2306660 8111989 7260463 | 423 | 0.471 | 0.709 | 0.965 | 0.658 | 0.880 |
| chr 19 | 2306660 8111989 7260463 | 243 | 0.055 | 0.094 | 0.053 | 0.005 | 0.494 |
| chr 19 | 2306660 8111989 7260463 | 443 | 0.638 | 0.976 | 0.558 | 0.413 | 0.546 |
| APP    | 2829961 3787620 373521  | 411 | 0.465 | 0.354 | 0.606 | 0.671 | 0.974 |
| APP    | 2829961 3787620 373521  | 222 | 0.149 | 0.706 | 0.490 | 0.973 | 0.305 |
| APP    | 2829961 3787620 373521  | 212 | 0.925 | 0.249 | 0.857 | 0.552 | 0.676 |
| APP    | 2829961 3787620 373521  | 412 | 0.806 | 0.777 | 0.482 | 0.627 | 0.440 |
| APP    | 3787620 373521 2829973  | 123 | 0.913 | 0.418 | 0.590 | 0.732 | 0.824 |
| APP    | 3787620 373521 2829973  | 111 | 0.344 | 0.450 | 0.801 | 0.744 | 0.760 |
| APP    | 3787620 373521 2829973  | 221 | 0.228 | 0.909 | 0.754 | 0.838 | 0.254 |
| APP    | 3787620 373521 2829973  | 121 | 0.987 | 0.972 | 0.887 | 0.793 | 0.190 |
| APP    | 373521 2829973 1783025  | 212 | 0.445 | 0.827 | 0.950 | 0.999 | 0.755 |
| APP    | 373521 2829973 1783025  | 234 | 0.911 | 0.447 | 0.650 | 0.708 | 0.774 |
| APP    | 373521 2829973 1783025  | 114 | 0.381 | 0.432 | 0.734 | 0.760 | 0.778 |
| APP    | 2829973 1783025 380417  | 124 | 0.530 | 0.362 | 0.846 | 0.579 | 0.675 |
| APP    | 2829973 1783025 380417  | 344 | 0.012 | 0.185 | 0.642 | 0.253 | 0.169 |
| APP    | 2829973 1783025 380417  | 144 | 0.688 | 0.247 | 0.180 | 0.055 | 0.740 |
| APP    | 2829973 1783025 380417  | 122 | 0.682 | 0.426 | 0.721 | 0.458 | 0.881 |
| APP    | 2829973 1783025 380417  | 342 | 0.528 | 0.220 | 0.479 | 0.502 | 0.957 |
| APP    | 2829973 1783025 380417  | 142 | 0.545 | 0.136 | 0.932 | 0.588 | 0.996 |
| APP    | 1783025 380417 1787438  | 244 | 0.458 | 0.772 | 0.961 | 0.526 | 0.056 |
| APP    | 1783025 380417 1787438  | 444 | 0.831 | 0.594 | 0.987 | 0.377 | 0.737 |
| APP    | 1783025 380417 1787438  | 243 | 0.962 | 0.319 | 0.807 | 0.930 | 0.149 |
| APP    | 1783025 380417 1787438  | 443 | 0.197 | 0.951 | 0.129 | 0.057 | 0.691 |
| APP    | 1783025 380417 1787438  | 223 | 0.665 | 0.428 | 0.711 | 0.462 | 0.830 |
| APP    | 1783025 380417 1787438  | 423 | 0.219 | 0.791 | 0.425 | 0.227 | 0.930 |
| APP    | 380417 1787438 17001492 | 432 | 0.278 | 0.714 | 0.013 | 0.083 | 0.114 |
| APP    | 380417 1787438 17001492 | 441 | 0.593 | 0.619 | 0.973 | 0.898 | 0.141 |
| APP    | 380417 1787438 17001492 | 431 | 0.868 | 0.617 | 0.149 | 0.911 | 0.947 |

|            |          |          |          |     |       |       |       |       |       |
|------------|----------|----------|----------|-----|-------|-------|-------|-------|-------|
| <b>APP</b> | 380417   | 1787438  | 17001492 | 231 | 0.147 | 0.598 | 0.471 | 0.291 | 0.817 |
| <b>APP</b> | 1787438  | 17001492 | 1783016  | 414 | 0.486 | 0.024 | 0.239 | 0.734 | 0.316 |
| <b>APP</b> | 1787438  | 17001492 | 1783016  | 314 | 0.942 | 0.917 | 0.488 | 0.130 | 0.956 |
| <b>APP</b> | 1787438  | 17001492 | 1783016  | 322 | 0.124 | 0.896 | 0.015 | 0.057 | 0.240 |
| <b>APP</b> | 1787438  | 17001492 | 1783016  | 412 | 0.340 | 0.635 | 0.593 | 0.994 | 0.200 |
| <b>APP</b> | 1787438  | 17001492 | 1783016  | 312 | 0.273 | 0.889 | 0.474 | 0.749 | 0.830 |
| <b>APP</b> | 17001492 | 1783016  | 396969   | 121 | 0.449 | 0.955 | 0.988 | 0.745 | 0.351 |
| <b>APP</b> | 17001492 | 1783016  | 396969   | 143 | 0.796 | 0.608 | 0.330 | 0.128 | 0.826 |
| <b>APP</b> | 17001492 | 1783016  | 396969   | 223 | 0.124 | 0.895 | 0.015 | 0.057 | 0.240 |
| <b>APP</b> | 17001492 | 1783016  | 396969   | 123 | 0.318 | 0.735 | 0.661 | 0.629 | 0.935 |
| <b>APP</b> | 1783016  | 396969   | 214488   | 212 | 0.449 | 0.955 | 0.988 | 0.745 | 0.351 |
| <b>APP</b> | 1783016  | 396969   | 214488   | 232 | 0.215 | 0.869 | 0.370 | 0.145 | 0.317 |
| <b>APP</b> | 1783016  | 396969   | 214488   | 434 | 0.796 | 0.608 | 0.330 | 0.128 | 0.826 |
| <b>APP</b> | 1783016  | 396969   | 214488   | 234 | 0.319 | 0.616 | 0.821 | 0.615 | 0.973 |
| <b>APP</b> | 396969   | 214488   | 383700   | 121 | 0.449 | 0.955 | 0.988 | 0.745 | 0.351 |
| <b>APP</b> | 396969   | 214488   | 383700   | 323 | 0.215 | 0.869 | 0.370 | 0.145 | 0.317 |
| <b>APP</b> | 396969   | 214488   | 383700   | 343 | 0.126 | 0.923 | 0.458 | 0.332 | 0.850 |
| <b>APP</b> | 214488   | 383700   | 2829984  | 234 | 0.261 | 0.811 | 0.410 | 0.208 | 0.471 |
| <b>APP</b> | 214488   | 383700   | 2829984  | 212 | 0.449 | 0.955 | 0.988 | 0.745 | 0.351 |
| <b>APP</b> | 214488   | 383700   | 2829984  | 432 | 0.126 | 0.923 | 0.458 | 0.332 | 0.850 |
| <b>APP</b> | 383700   | 2829984  | 2234983  | 321 | 0.779 | 0.442 | 0.687 | 0.610 | 0.998 |
| <b>APP</b> | 383700   | 2829984  | 2234983  | 343 | 0.261 | 0.811 | 0.410 | 0.208 | 0.471 |
| <b>APP</b> | 383700   | 2829984  | 2234983  | 123 | 0.449 | 0.955 | 0.988 | 0.745 | 0.351 |
| <b>APP</b> | 383700   | 2829984  | 2234983  | 323 | 0.154 | 0.632 | 0.373 | 0.283 | 0.961 |
| <b>APP</b> | 2829984  | 2234983  | 216779   | 432 | 0.935 | 0.417 | 0.130 | 0.844 | 0.980 |
| <b>APP</b> | 2829984  | 2234983  | 216779   | 232 | 0.147 | 0.331 | 0.594 | 0.113 | 0.732 |
| <b>APP</b> | 2829984  | 2234983  | 216779   | 211 | 0.779 | 0.442 | 0.687 | 0.610 | 0.998 |
| <b>APP</b> | 2829984  | 2234983  | 216779   | 431 | 0.139 | 0.769 | 0.034 | 0.156 | 0.361 |
| <b>APP</b> | 2829984  | 2234983  | 216779   | 231 | 0.111 | 0.399 | 0.480 | 0.492 | 0.524 |
| <b>APP</b> | 2234983  | 216779   | 400603   | 313 | 0.552 | 0.452 | 0.766 | 0.780 | 0.548 |
| <b>APP</b> | 2234983  | 216779   | 400603   | 321 | 0.363 | 0.939 | 0.150 | 0.350 | 0.830 |
| <b>APP</b> | 2234983  | 216779   | 400603   | 111 | 0.779 | 0.442 | 0.687 | 0.610 | 0.998 |
| <b>APP</b> | 2234983  | 216779   | 400603   | 311 | 0.267 | 0.264 | 0.748 | 0.963 | 0.820 |
| <b>APP</b> | 216779   | 400603   | 2829997  | 133 | 0.552 | 0.452 | 0.766 | 0.780 | 0.548 |
| <b>APP</b> | 216779   | 400603   | 2829997  | 213 | 0.363 | 0.939 | 0.150 | 0.350 | 0.830 |
| <b>APP</b> | 216779   | 400603   | 2829997  | 113 | 0.985 | 0.642 | 0.862 | 0.691 | 0.980 |
| <b>APP</b> | 216779   | 400603   | 2829997  | 111 | 0.371 | 0.386 | 0.609 | 0.963 | 0.805 |
| <b>APP</b> | 400603   | 2829997  | 440666   | 334 | 0.552 | 0.452 | 0.766 | 0.780 | 0.548 |
| <b>APP</b> | 400603   | 2829997  | 440666   | 134 | 0.821 | 0.393 | 0.695 | 0.565 | 0.930 |
| <b>APP</b> | 400603   | 2829997  | 440666   | 132 | 0.537 | 0.632 | 0.079 | 0.234 | 0.958 |
| <b>APP</b> | 400603   | 2829997  | 440666   | 112 | 0.371 | 0.386 | 0.609 | 0.963 | 0.805 |
| <b>APP</b> | 2829997  | 440666   | 2014146  | 343 | 0.332 | 0.550 | 0.726 | 0.400 | 0.705 |
| <b>APP</b> | 2829997  | 440666   | 2014146  | 323 | 0.921 | 0.547 | 0.292 | 0.096 | 0.675 |
| <b>APP</b> | 2829997  | 440666   | 2014146  | 123 | 0.655 | 0.624 | 0.080 | 0.755 | 0.348 |
| <b>APP</b> | 2829997  | 440666   | 2014146  | 341 | 0.424 | 0.161 | 0.527 | 0.367 | 0.694 |
| <b>APP</b> | 2829997  | 440666   | 2014146  | 321 | 0.442 | 0.842 | 0.108 | 0.717 | 0.695 |
| <b>APP</b> | 2829997  | 440666   | 2014146  | 121 | 0.198 | 0.192 | 0.212 | 0.790 | 0.484 |
| <b>APP</b> | 440666   | 2014146  | 216762   | 434 | 0.058 | 0.047 | 0.254 | 0.212 | 0.926 |
| <b>APP</b> | 440666   | 2014146  | 216762   | 234 | 0.630 | 0.762 | 0.157 | 0.873 | 0.431 |
| <b>APP</b> | 440666   | 2014146  | 216762   | 414 | 0.441 | 0.301 | 0.706 | 0.284 | 0.973 |
| <b>APP</b> | 440666   | 2014146  | 216762   | 412 | 0.729 | 0.397 | 0.623 | 0.818 | 0.641 |
| <b>APP</b> | 440666   | 2014146  | 216762   | 212 | 0.390 | 0.259 | 0.115 | 0.848 | 0.678 |

|            |           |         |         |     |       |       |       |       |       |
|------------|-----------|---------|---------|-----|-------|-------|-------|-------|-------|
| <b>APP</b> | 2014146   | 216762  | 2070657 | 123 | 0.710 | 0.241 | 0.270 | 0.902 | 0.926 |
| <b>APP</b> | 2014146   | 216762  | 2070657 | 341 | 0.860 | 0.965 | 0.236 | 0.662 | 0.428 |
| <b>APP</b> | 2014146   | 216762  | 2070657 | 141 | 0.537 | 0.521 | 0.941 | 0.545 | 0.840 |
| <b>APP</b> | 2014146   | 216762  | 2070657 | 121 | 0.713 | 0.703 | 0.686 | 0.951 | 0.489 |
| <b>APP</b> | 216762    | 2070657 | 7276036 | 231 | 0.806 | 0.365 | 0.338 | 0.935 | 0.983 |
| <b>APP</b> | 216762    | 2070657 | 7276036 | 411 | 0.630 | 0.688 | 0.135 | 0.327 | 0.889 |
| <b>APP</b> | 216762    | 2070657 | 7276036 | 211 | 0.822 | 0.351 | 0.970 | 0.905 | 0.403 |
| <b>APP</b> | 216762    | 2070657 | 7276036 | 413 | 0.694 | 0.656 | 0.130 | 0.842 | 0.540 |
| <b>APP</b> | 216762    | 2070657 | 7276036 | 213 | 0.667 | 0.535 | 0.671 | 0.969 | 0.358 |
| <b>APP</b> | 2070657   | 7276036 | 2830000 | 311 | 0.777 | 0.378 | 0.356 | 0.984 | 0.982 |
| <b>APP</b> | 2070657   | 7276036 | 2830000 | 111 | 0.617 | 0.427 | 0.298 | 0.558 | 0.569 |
| <b>APP</b> | 4 2070657 | 7276036 | 2830000 | 132 | 0.996 | 0.244 | 0.180 | 0.804 | 0.812 |
| <b>APP</b> | 7276036   | 2830000 | 2830001 | 111 | 0.664 | 0.372 | 0.384 | 0.624 | 0.480 |
| <b>APP</b> | 7276036   | 2830000 | 2830001 | 113 | 0.805 | 0.403 | 0.314 | 0.976 | 0.933 |
| <b>APP</b> | 7276036   | 2830000 | 2830001 | 323 | 0.969 | 0.234 | 0.180 | 0.804 | 0.812 |
| <b>APP</b> | 2830000   | 2830001 | 7278838 | 111 | 0.978 | 0.214 | 0.180 | 0.548 | 0.397 |
| <b>APP</b> | 2830000   | 2830001 | 7278838 | 131 | 0.607 | 0.357 | 0.193 | 0.596 | 0.920 |
| <b>APP</b> | 2830000   | 2830001 | 7278838 | 231 | 0.661 | 0.623 | 0.218 | 0.024 | 0.276 |
| <b>APP</b> | 2830000   | 2830001 | 7278838 | 132 | 0.853 | 0.861 | 0.989 | 0.490 | 0.997 |
| <b>APP</b> | 2830000   | 2830001 | 7278838 | 232 | 0.747 | 0.160 | 0.046 | 0.123 | 0.685 |
| <b>APP</b> | 2830001   | 7278838 | 2830008 | 312 | 0.397 | 0.260 | 0.069 | 0.318 | 0.218 |
| <b>APP</b> | 2830001   | 7278838 | 2830008 | 114 | 0.912 | 0.262 | 0.245 | 0.472 | 0.328 |
| <b>APP</b> | 2830001   | 7278838 | 2830008 | 324 | 0.805 | 0.101 | 0.024 | 0.312 | 0.601 |
| <b>APP</b> | 7278838   | 2830008 | 2830012 | 121 | 0.421 | 0.218 | 0.085 | 0.853 | 0.263 |
| <b>APP</b> | 7278838   | 2830008 | 2830012 | 141 | 0.511 | 0.439 | 0.379 | 0.677 | 0.222 |
| <b>APP</b> | 7278838   | 2830008 | 2830012 | 241 | 0.775 | 0.245 | 0.630 | 0.295 | 0.095 |
| <b>APP</b> | 7278838   | 2830008 | 2830012 | 123 | 0.857 | 0.885 | 0.609 | 0.023 | 0.686 |
| <b>APP</b> | 7278838   | 2830008 | 2830012 | 243 | 0.784 | 0.298 | 0.011 | 0.615 | 0.179 |
| <b>APP</b> | 2830008   | 2830012 | 2226330 | 411 | 0.682 | 0.459 | 0.728 | 0.654 | 0.257 |
| <b>APP</b> | 2830008   | 2830012 | 2226330 | 212 | 0.563 | 0.158 | 0.077 | 0.971 | 0.241 |
| <b>APP</b> | 2830008   | 2830012 | 2226330 | 412 | 0.769 | 0.315 | 0.370 | 0.312 | 0.130 |
| <b>APP</b> | 2830008   | 2830012 | 2226330 | 232 | 0.882 | 0.973 | 0.538 | 0.030 | 0.677 |
| <b>APP</b> | 2830008   | 2830012 | 2226330 | 432 | 0.808 | 0.350 | 0.018 | 0.735 | 0.109 |
| <b>APP</b> | 2830012   | 2226330 | 2830017 | 114 | 0.682 | 0.459 | 0.728 | 0.654 | 0.257 |
| <b>APP</b> | 2830012   | 2226330 | 2830017 | 122 | 0.724 | 0.501 | 0.039 | 0.606 | 0.048 |
| <b>APP</b> | 2830012   | 2226330 | 2830017 | 322 | 0.846 | 0.363 | 0.033 | 0.696 | 0.145 |
| <b>APP</b> | 2226330   | 2830017 | 2830018 | 143 | 0.682 | 0.459 | 0.728 | 0.654 | 0.257 |
| <b>APP</b> | 2226330   | 2830017 | 2830018 | 221 | 0.682 | 0.468 | 0.687 | 0.764 | 0.210 |
| <b>APP</b> | 2830017   | 2830018 | 768039  | 214 | 0.978 | 0.904 | 0.085 | 0.850 | 0.361 |
| <b>APP</b> | 2830017   | 2830018 | 768039  | 432 | 0.676 | 0.474 | 0.644 | 0.732 | 0.223 |
| <b>APP</b> | 2830017   | 2830018 | 768039  | 212 | 0.869 | 0.896 | 0.129 | 0.777 | 0.193 |
| <b>APP</b> | 2830018   | 768039  | 2830028 | 124 | 0.287 | 0.041 | 0.006 | 0.910 | 0.425 |
| <b>APP</b> | 2830018   | 768039  | 2830028 | 143 | 0.915 | 0.805 | 0.101 | 0.757 | 0.273 |
| <b>APP</b> | 2830018   | 768039  | 2830028 | 323 | 0.432 | 0.834 | 0.839 | 0.896 | 0.030 |
| <b>APP</b> | 2830018   | 768039  | 2830028 | 123 | 0.476 | 0.068 | 0.398 | 0.727 | 0.555 |
| <b>APP</b> | 768039    | 2830028 | 3991    | 434 | 0.710 | 0.187 | 0.293 | 0.488 | 0.298 |
| <b>APP</b> | 768039    | 2830028 | 3991    | 234 | 0.615 | 0.651 | 0.941 | 0.946 | 0.391 |
| <b>APP</b> | 768039    | 2830028 | 3991    | 243 | 0.242 | 0.025 | 0.003 | 0.860 | 0.289 |
| <b>APP</b> | 768039    | 2830028 | 3991    | 433 | 0.941 | 0.694 | 0.200 | 0.992 | 0.489 |
| <b>APP</b> | 768039    | 2830028 | 3991    | 233 | 0.130 | 0.015 | 0.325 | 0.681 | 0.449 |
| <b>APP</b> | 2830028   | 3991    | 2830033 | 344 | 0.802 | 0.815 | 0.577 | 0.701 | 0.812 |
| <b>APP</b> | 2830028   | 3991    | 2830033 | 334 | 0.737 | 0.306 | 0.298 | 0.777 | 0.365 |

|     |          |          |          |     |       |       |       |       |       |
|-----|----------|----------|----------|-----|-------|-------|-------|-------|-------|
| APP | 2830028  | 3991     | 2830033  | 432 | 0.217 | 0.019 | 0.004 | 0.956 | 0.241 |
| APP | 2830028  | 3991     | 2830033  | 332 | 0.178 | 0.032 | 0.021 | 0.632 | 0.125 |
| APP | 3991     | 2830033  | 2830036  | 324 | 0.065 | 0.002 | 0.035 | 0.890 | 0.499 |
| APP | 3991     | 2830033  | 2830036  | 442 | 0.802 | 0.815 | 0.577 | 0.701 | 0.812 |
| APP | 3991     | 2830033  | 2830036  | 342 | 0.737 | 0.306 | 0.298 | 0.777 | 0.365 |
| APP | 3991     | 2830033  | 2830036  | 322 | 0.078 | 0.008 | 0.115 | 0.588 | 0.276 |
| APP | 2830033  | 2830036  | 2830038  | 243 | 0.081 | 0.002 | 0.032 | 0.869 | 0.483 |
| APP | 2830033  | 2830036  | 2830038  | 223 | 0.122 | 0.012 | 0.730 | 0.498 | 0.272 |
| APP | 2830033  | 2830036  | 2830038  | 421 | 0.732 | 0.851 | 0.964 | 0.610 | 0.478 |
| APP | 2830033  | 2830036  | 2830038  | 221 | 0.442 | 0.318 | 0.061 | 0.927 | 0.715 |
| APP | 2830036  | 2830038  | 7283136  | 232 | 0.719 | 0.806 | 0.306 | 0.990 | 0.831 |
| APP | 2830036  | 2830038  | 7283136  | 434 | 0.081 | 0.002 | 0.032 | 0.869 | 0.483 |
| APP | 2830036  | 2830038  | 7283136  | 234 | 0.121 | 0.004 | 0.643 | 0.378 | 0.089 |
| APP | 2830036  | 2830038  | 7283136  | 214 | 0.634 | 0.387 | 0.044 | 0.692 | 0.761 |
| APP | 2830038  | 7283136  | 2830040  | 144 | 0.177 | 0.187 | 0.230 | 0.942 | 0.083 |
| APP | 2830038  | 7283136  | 2830040  | 322 | 0.719 | 0.806 | 0.306 | 0.990 | 0.831 |
| APP | 2830038  | 7283136  | 2830040  | 342 | 0.550 | 0.295 | 0.106 | 0.697 | 0.679 |
| APP | 2830038  | 7283136  | 2830040  | 142 | 0.751 | 0.871 | 0.172 | 0.688 | 0.244 |
| APP | 7283136  | 2830040  | 731523   | 224 | 0.736 | 0.634 | 0.439 | 0.984 | 0.920 |
| APP | 7283136  | 2830040  | 731523   | 442 | 0.182 | 0.189 | 0.228 | 0.938 | 0.085 |
| APP | 7283136  | 2830040  | 731523   | 222 | 0.851 | 0.991 | 0.102 | 0.974 | 0.749 |
| APP | 7283136  | 2830040  | 731523   | 422 | 0.201 | 0.246 | 0.864 | 0.946 | 0.255 |
| APP | 2830040  | 731523   | 2830044  | 422 | 0.177 | 0.187 | 0.230 | 0.942 | 0.083 |
| APP | 2830040  | 731523   | 2830044  | 222 | 0.867 | 0.679 | 0.266 | 0.998 | 0.568 |
| APP | 2830040  | 731523   | 2830044  | 244 | 0.736 | 0.634 | 0.439 | 0.984 | 0.920 |
| APP | 2830040  | 731523   | 2830044  | 224 | 0.364 | 0.246 | 0.068 | 0.973 | 0.722 |
| APP | 731523   | 2830044  | 2830051  | 222 | 0.631 | 0.857 | 0.245 | 0.891 | 0.431 |
| APP | 731523   | 2830044  | 2830051  | 442 | 0.736 | 0.634 | 0.439 | 0.984 | 0.920 |
| APP | 731523   | 2830044  | 2830051  | 242 | 0.471 | 0.359 | 0.450 | 0.793 | 0.141 |
| APP | 731523   | 2830044  | 2830051  | 224 | 0.442 | 0.301 | 0.064 | 0.952 | 0.645 |
| APP | 731523   | 2830044  | 2830051  | 244 | 0.146 | 0.063 | 0.210 | 0.816 | 0.140 |
| APP | 2830044  | 2830051  | 2830052  | 442 | 0.227 | 0.424 | 0.852 | 0.441 | 0.214 |
| APP | 2830044  | 2830051  | 2830052  | 424 | 0.422 | 0.280 | 0.631 | 0.802 | 0.142 |
| APP | 2830044  | 2830051  | 2830052  | 244 | 0.462 | 0.324 | 0.047 | 0.979 | 0.754 |
| APP | 2830044  | 2830051  | 2830052  | 444 | 0.656 | 0.126 | 0.155 | 0.556 | 0.643 |
| APP | 2830051  | 2830052  | 11702267 | 424 | 0.763 | 0.843 | 0.136 | 0.534 | 0.716 |
| APP | 2830051  | 2830052  | 11702267 | 422 | 0.130 | 0.344 | 0.612 | 0.243 | 0.311 |
| APP | 2830051  | 2830052  | 11702267 | 242 | 0.342 | 0.272 | 0.520 | 0.825 | 0.186 |
| APP | 2830051  | 2830052  | 11702267 | 442 | 0.618 | 0.922 | 0.351 | 0.628 | 0.990 |
| APP | 2830052  | 11702267 | 2830054  | 243 | 0.744 | 0.832 | 0.144 | 0.535 | 0.714 |
| APP | 2830052  | 11702267 | 2830054  | 223 | 0.308 | 0.529 | 0.481 | 0.399 | 0.235 |
| APP | 2830052  | 11702267 | 2830054  | 423 | 0.858 | 0.914 | 0.464 | 0.579 | 0.076 |
| APP | 2830052  | 11702267 | 2830054  | 424 | 0.225 | 0.449 | 0.366 | 0.301 | 0.970 |
| APP | 11702267 | 2830054  | 12482262 | 233 | 0.624 | 0.279 | 0.384 | 0.207 | 0.013 |
| APP | 11702267 | 2830054  | 12482262 | 431 | 0.987 | 0.982 | 0.106 | 0.592 | 0.631 |
| APP | 11702267 | 2830054  | 12482262 | 231 | 0.546 | 0.956 | 0.628 | 0.531 | 0.392 |
| APP | 11702267 | 2830054  | 12482262 | 241 | 0.584 | 0.770 | 0.535 | 0.431 | 0.919 |
| APP | 2830054  | 12482262 | 2256331  | 333 | 0.692 | 0.820 | 0.247 | 0.113 | 0.196 |
| APP | 2830054  | 12482262 | 2256331  | 313 | 0.492 | 0.772 | 0.605 | 0.719 | 0.266 |
| APP | 2830054  | 12482262 | 2256331  | 413 | 0.687 | 0.171 | 0.900 | 0.951 | 0.867 |
| APP | 2830054  | 12482262 | 2256331  | 334 | 0.347 | 0.210 | 0.800 | 0.677 | 0.021 |
| APP | 2830054  | 12482262 | 2256331  | 414 | 0.799 | 0.544 | 0.498 | 0.470 | 0.846 |

|     |          |          |          |     |       |       |       |       |       |
|-----|----------|----------|----------|-----|-------|-------|-------|-------|-------|
| APP | 12482262 | 2256331  | 3827166  | 133 | 0.496 | 0.123 | 0.807 | 0.904 | 0.781 |
| APP | 12482262 | 2256331  | 3827166  | 134 | 0.374 | 0.616 | 0.550 | 0.604 | 0.324 |
| APP | 12482262 | 2256331  | 3827166  | 344 | 0.590 | 0.241 | 0.572 | 0.431 | 0.024 |
| APP | 12482262 | 2256331  | 3827166  | 144 | 0.673 | 0.768 | 0.346 | 0.393 | 0.792 |
| APP | 2256331  | 3827166  | 2830058  | 332 | 0.472 | 0.124 | 0.787 | 0.912 | 0.809 |
| APP | 2256331  | 3827166  | 2830058  | 344 | 0.451 | 0.687 | 0.519 | 0.447 | 0.450 |
| APP | 2256331  | 3827166  | 2830058  | 444 | 0.790 | 0.533 | 0.436 | 0.530 | 0.371 |
| APP | 3827166  | 2830058  | 2830068  | 444 | 0.390 | 0.685 | 0.518 | 0.637 | 0.242 |
| APP | 3827166  | 2830058  | 2830068  | 322 | 0.503 | 0.124 | 0.787 | 0.901 | 0.773 |
| APP | 3827166  | 2830058  | 2830068  | 442 | 0.713 | 0.543 | 0.438 | 0.720 | 0.203 |
| APP | 2830058  | 2830068  | 2830076  | 444 | 0.488 | 0.843 | 0.611 | 0.697 | 0.267 |
| APP | 2830058  | 2830068  | 2830076  | 424 | 0.617 | 0.269 | 0.525 | 0.666 | 0.202 |
| APP | 2830058  | 2830068  | 2830076  | 222 | 0.503 | 0.124 | 0.787 | 0.901 | 0.773 |
| APP | 2830058  | 2830068  | 2830076  | 422 | 0.605 | 0.774 | 0.336 | 0.816 | 0.365 |
| APP | 2830068  | 2830076  | 2830079  | 223 | 0.402 | 0.094 | 0.738 | 0.635 | 0.681 |
| APP | 2830068  | 2830076  | 2830079  | 441 | 0.488 | 0.843 | 0.611 | 0.697 | 0.267 |
| APP | 2830068  | 2830076  | 2830079  | 241 | 0.617 | 0.269 | 0.524 | 0.666 | 0.202 |
| APP | 2830068  | 2830076  | 2830079  | 221 | 0.703 | 0.663 | 0.307 | 0.522 | 0.659 |
| APP | 2830076  | 2830079  | 466609   | 213 | 0.059 | 0.100 | 0.102 | 0.263 | 0.422 |
| APP | 2830076  | 2830079  | 466609   | 234 | 0.402 | 0.094 | 0.738 | 0.635 | 0.681 |
| APP | 2830076  | 2830079  | 466609   | 414 | 0.406 | 0.543 | 0.424 | 0.791 | 0.516 |
| APP | 2830076  | 2830079  | 466609   | 214 | 0.200 | 0.720 | 0.056 | 0.226 | 0.432 |
| APP | 2830079  | 466609   | 12482753 | 343 | 0.555 | 0.531 | 0.820 | 0.084 | 0.046 |
| APP | 2830079  | 466609   | 12482753 | 131 | 0.059 | 0.100 | 0.102 | 0.263 | 0.422 |
| APP | 2830079  | 466609   | 12482753 | 341 | 0.503 | 0.124 | 0.787 | 0.901 | 0.773 |
| APP | 2830079  | 466609   | 12482753 | 141 | 0.552 | 0.799 | 0.164 | 0.250 | 0.833 |
| APP | 466609   | 12482753 | 375369   | 431 | 0.555 | 0.531 | 0.820 | 0.084 | 0.046 |
| APP | 466609   | 12482753 | 375369   | 411 | 0.703 | 0.632 | 0.390 | 0.857 | 0.474 |
| APP | 466609   | 12482753 | 375369   | 313 | 0.059 | 0.100 | 0.102 | 0.263 | 0.422 |
| APP | 466609   | 12482753 | 375369   | 413 | 0.185 | 0.760 | 0.063 | 0.219 | 0.478 |
| APP | 12482753 | 375369   | 2830088  | 312 | 0.555 | 0.531 | 0.820 | 0.084 | 0.046 |
| APP | 12482753 | 375369   | 2830088  | 112 | 0.738 | 0.499 | 0.369 | 0.823 | 0.213 |
| APP | 12482753 | 375369   | 2830088  | 114 | 0.844 | 0.413 | 0.956 | 0.863 | 0.095 |
| APP | 12482753 | 375369   | 2830088  | 134 | 0.800 | 0.544 | 0.345 | 0.559 | 0.740 |
| APP | 375369   | 2830088  | 17588612 | 122 | 0.758 | 0.468 | 0.167 | 0.303 | 0.815 |
| APP | 375369   | 2830088  | 17588612 | 124 | 0.686 | 0.662 | 0.064 | 0.196 | 0.330 |
| APP | 375369   | 2830088  | 17588612 | 144 | 0.844 | 0.413 | 0.956 | 0.863 | 0.095 |
| APP | 375369   | 2830088  | 17588612 | 344 | 0.800 | 0.544 | 0.345 | 0.559 | 0.740 |
| APP | 2830088  | 17588612 | 10460695 | 241 | 0.503 | 0.124 | 0.787 | 0.901 | 0.773 |
| APP | 2830088  | 17588612 | 10460695 | 223 | 0.758 | 0.468 | 0.167 | 0.303 | 0.815 |
| APP | 2830088  | 17588612 | 10460695 | 243 | 0.310 | 0.471 | 0.056 | 0.103 | 0.379 |
| APP | 2830088  | 17588612 | 10460695 | 443 | 0.832 | 0.414 | 0.334 | 0.503 | 0.437 |
| APP | 17588612 | 10460695 | 2186302  | 232 | 0.758 | 0.468 | 0.167 | 0.303 | 0.815 |
| APP | 17588612 | 10460695 | 2186302  | 432 | 0.237 | 0.368 | 0.063 | 0.273 | 0.141 |
| APP | 17588612 | 10460695 | 2186302  | 414 | 0.503 | 0.124 | 0.787 | 0.901 | 0.773 |
| APP | 17588612 | 10460695 | 2186302  | 434 | 0.738 | 0.499 | 0.369 | 0.823 | 0.213 |
| APP | 10460695 | 2186302  | 13049230 | 323 | 0.396 | 0.816 | 0.515 | 0.819 | 0.264 |
| APP | 10460695 | 2186302  | 13049230 | 141 | 0.503 | 0.124 | 0.787 | 0.901 | 0.773 |
| APP | 10460695 | 2186302  | 13049230 | 341 | 0.738 | 0.499 | 0.369 | 0.823 | 0.213 |
| APP | 2186302  | 13049230 | 370345   | 232 | 0.396 | 0.816 | 0.515 | 0.819 | 0.264 |
| APP | 2186302  | 13049230 | 370345   | 412 | 0.934 | 0.786 | 0.737 | 0.292 | 0.010 |
| APP | 2186302  | 13049230 | 370345   | 414 | 0.429 | 0.661 | 0.366 | 0.467 | 0.872 |

|            |          |         |         |  |     |       |       |       |       |       |
|------------|----------|---------|---------|--|-----|-------|-------|-------|-------|-------|
| <b>APP</b> | 13049230 | 370345  | 6516727 |  | 323 | 0.400 | 0.820 | 0.518 | 0.825 | 0.270 |
| <b>APP</b> | 13049230 | 370345  | 6516727 |  | 123 | 0.560 | 0.865 | 0.467 | 0.043 | 0.089 |
| <b>APP</b> | 13049230 | 370345  | 6516727 |  | 121 | 0.706 | 0.384 | 0.815 | 0.898 | 0.103 |
| <b>APP</b> | 13049230 | 370345  | 6516727 |  | 141 | 0.432 | 0.664 | 0.367 | 0.471 | 0.876 |
| <b>APP</b> | 370345   | 6516727 | 2830104 |  | 413 | 0.790 | 0.226 | 0.567 | 0.931 | 0.922 |
| <b>APP</b> | 370345   | 6516727 | 2830104 |  | 231 | 0.319 | 0.608 | 0.337 | 0.469 | 0.434 |
| <b>APP</b> | 370345   | 6516727 | 2830104 |  | 211 | 0.701 | 0.377 | 0.806 | 0.910 | 0.103 |
| <b>APP</b> | 370345   | 6516727 | 2830104 |  | 411 | 0.562 | 0.718 | 0.219 | 0.456 | 0.832 |
| <b>APP</b> | 6516727  | 2830104 | 462281  |  | 113 | 0.728 | 0.408 | 0.846 | 0.858 | 0.098 |
| <b>APP</b> | 6516727  | 2830104 | 462281  |  | 131 | 0.790 | 0.226 | 0.567 | 0.931 | 0.922 |
| <b>APP</b> | 6516727  | 2830104 | 462281  |  | 311 | 0.319 | 0.608 | 0.337 | 0.469 | 0.434 |
| <b>APP</b> | 6516727  | 2830104 | 462281  |  | 111 | 0.569 | 0.707 | 0.225 | 0.468 | 0.837 |
| <b>APP</b> | 2830104  | 462281  | 466448  |  | 133 | 0.727 | 0.397 | 0.823 | 0.872 | 0.098 |
| <b>APP</b> | 2830104  | 462281  | 466448  |  | 313 | 0.484 | 0.106 | 0.598 | 0.935 | 0.904 |
| <b>APP</b> | 2830104  | 462281  | 466448  |  | 113 | 0.458 | 0.976 | 0.856 | 0.999 | 0.328 |
| <b>APP</b> | 2830104  | 462281  | 466448  |  | 111 | 0.735 | 0.408 | 0.617 | 0.953 | 0.693 |
| <b>APP</b> | 462281   | 466448  | 438031  |  | 132 | 0.307 | 0.100 | 0.718 | 0.913 | 0.960 |
| <b>APP</b> | 462281   | 466448  | 438031  |  | 334 | 0.727 | 0.397 | 0.823 | 0.872 | 0.098 |
| <b>APP</b> | 462281   | 466448  | 438031  |  | 134 | 0.305 | 0.916 | 0.768 | 0.884 | 0.343 |
| <b>APP</b> | 462281   | 466448  | 438031  |  | 114 | 0.746 | 0.405 | 0.555 | 0.991 | 0.707 |
| <b>APP</b> | 466448   | 438031  | 2156079 |  | 341 | 0.175 | 0.832 | 0.744 | 0.821 | 0.145 |
| <b>APP</b> | 466448   | 438031  | 2156079 |  | 323 | 0.330 | 0.104 | 0.747 | 0.855 | 0.929 |
| <b>APP</b> | 466448   | 438031  | 2156079 |  | 343 | 0.615 | 0.705 | 0.918 | 0.433 | 0.015 |
| <b>APP</b> | 466448   | 438031  | 2156079 |  | 143 | 0.746 | 0.405 | 0.555 | 0.991 | 0.707 |

**Table S6.** Haplotype analyses of Cognitive Phenotypes in *APOE*  $\epsilon$ 4 negative samples from the LBC1936 dataset. Results shown are p values and were considered significant if  $p < 0.00056$ . \* indicates a p value significant at corrected threshold level  $p \leq 0.00056$ . The following abbreviations are used: GCA11, general cognitive ability at age 11 (MHT adjusted for age); GCA70, general cognitive ability at age 70 (MHT adjusted for age); LM, logical memory; MR, matrix reasoning; VF, verbal fluency.

| Cohort  | Sample                     | Gene 1        | dbSNP ID (rs) | Gene 2     | dbSNP ID (rs) | p value  |
|---------|----------------------------|---------------|---------------|------------|---------------|----------|
| LBC1936 | Overall                    | <i>BIN1</i>   | rs744373      | <i>CLU</i> | rs11136000    | 0.000013 |
|         | APOE $\epsilon$ 4 positive | <i>PICALM</i> | rs10898427    | <i>APP</i> | rs466448      | 0.000034 |
|         |                            | <i>PICALM</i> | rs10792821    | <i>APP</i> | rs466448      | 0.000037 |

**Table S7.** Pairwise interaction analyses of genotype with general cognitive ability at age 11 (MHT adjusted for age) from the LBC1936 dataset. Results with  $p \leq 0.0001$  are shown.

| Cohort  | Samples                    | Gene 1       | dbSNP ID (rs) | Gene 2     | dbSNP ID (rs) | p value   |
|---------|----------------------------|--------------|---------------|------------|---------------|-----------|
| LBC1936 | APOE $\epsilon$ 4 positive | <i>BIN1</i>  | rs4663098     | <i>APP</i> | rs2830038     | 0.000022  |
|         | APOE $\epsilon$ 4 negative | <i>MARK4</i> | rs10445572    | <i>APP</i> | rs12482753    | 0.000024  |
|         |                            | <i>MARK4</i> | rs344807      | <i>APP</i> | rs12482753    | 0.000012* |

**Table S8.** Pairwise interaction analyses of genotype with general cognitive ability at age 70 (MHT adjusted for age) from the LBC1936 dataset. Results with  $p \leq 0.0001$  are shown. \* indicates a p value significant at corrected threshold level,  $p \leq 0.0000127$ .

| Cohort  | Sample                     | Gene 1      | dbSNP ID (rs) | Gene 2        | dbSNP ID (rs) | p value   |
|---------|----------------------------|-------------|---------------|---------------|---------------|-----------|
| LBC1936 | APOE $\epsilon$ 4 positive | <i>BIN1</i> | rs2276575     | <i>PICALM</i> | rs10898427    | 0.000098  |
|         |                            | <i>BIN1</i> | rs2276575     | <i>PICALM</i> | rs11234495    | 0.000071  |
|         |                            | <i>BIN1</i> | rs13430599    | <i>PICALM</i> | rs10898427    | 0.000098  |
|         |                            | <i>BIN1</i> | rs13430599    | <i>PICALM</i> | rs11234495    | 0.000071  |
|         |                            | <i>BIN1</i> | rs13426725    | <i>PICALM</i> | rs11234495    | 0.000082  |
|         | APOE $\epsilon$ 4 negative | <i>PS1</i>  | rs214260      | <i>APP</i>    | rs2829997     | 0.000088  |
|         |                            | <i>PS1</i>  | rs214260      | <i>APP</i>    | rs440666      | 0.000012* |
|         |                            | <i>PS1</i>  | rs362346      | <i>APP</i>    | rs440666      | 0.000099  |

**Table S9.** Pairwise interaction analyses of genotype with measures of verbal fluency from the LBC1936 dataset. Results with  $p \leq 0.0001$  are shown. \* indicates a p value significant at corrected threshold level,  $p \leq 0.0000127$ .

| Cohort  | Sample                     | Gene 1      | dbSNP ID (rs) | Gene 2     | dbSNP ID (rs) | p value  |
|---------|----------------------------|-------------|---------------|------------|---------------|----------|
| LBC1936 | Overall                    | <i>BIN1</i> | rs17014873    | <i>APP</i> | rs2830052     | 0.000054 |
|         | APOE $\epsilon$ 4 positive | <i>PS2</i>  | rs12126925    | <i>CLU</i> | rs9314349     | 0.000067 |

**Table S10.** Pairwise interaction analyses of genotype with measures of matrix reasoning from the LBC1936 dataset. Results with  $p \leq 0.0001$  are shown.

| Cohort  | Sample           | Gene 1      | dbSNP ID (rs) | Gene 2        | dbSNP ID (rs) | p value   |
|---------|------------------|-------------|---------------|---------------|---------------|-----------|
| LBC1936 | Overall          | <i>BIN1</i> | rs10200967    | <i>APP</i>    | rs2830036     | 0.000097  |
|         |                  | <i>BIN1</i> | rs4663098     | <i>APP</i>    | rs2830028     | 0.000090  |
|         | APOE ε4 positive | <i>BIN1</i> | rs10200967    | <i>APP</i>    | rs2830036     | 0.000011* |
|         |                  | <i>BIN1</i> | rs10200967    | <i>APP</i>    | rs466609      | 0.000092  |
|         |                  | <i>BIN1</i> | rs4663098     | <i>APP</i>    | rs2830028     | 0.000073  |
|         |                  | <i>BIN1</i> | rs4663098     | <i>APP</i>    | rs2830036     | 0.000021  |
|         |                  | <i>BIN1</i> | rs4663098     | <i>APP</i>    | rs2830038     | 0.000082  |
|         |                  | <i>PS2</i>  | rs1150895     | <i>PICALM</i> | rs3851179     | 0.000048* |
|         | APOE ε4 negative | <i>PS2</i>  | rs1150895     | <i>PICALM</i> | rs3851179     | 0.000048* |

**Table S11.** Pairwise interaction analyses of genotype with measures of logical memory from the LBC1936 dataset. Results with  $p \leq 0.0001$  are shown. \* indicates a p value significant at corrected threshold level,  $p \leq 0.000127$ .
